# Supplementary material for: Early correction of synaptic long-term depression improves abnormal anxiety-like behavior in adult GluN2B-C456Y-mutant mice
Source: PLoS Biol. 2020 Apr 30;18(4):e3000717. doi: 10.1371/journal.pbio.3000717 (PMC7217483; doi:10.1371/journal.pbio.3000717)
Supplement: S3 Data — (XLSX) [file pbio.3000717.s015.xlsx]

## Sheet: Fig1
B
Expression level (% of WT)
HT-E20
	GluN1			GluN2A			GluN2B
	WT	HT		WT	HT		WT	HT
1	1.35037	0.852887	1	1.59268	1.39328	1	1.12802	0.894297
2	0.830879	0.568247	2	0.711887	1.1609	2	0.893443	0.573022
3	1.07436	0.579781	3	0.973184	0.918745	3	1.13328	0.710827
4	0.744392	0.862949	4	0.722253	0.843676	4	0.845262	0.727788
Homo-E20
	GluN1			GluN2A			GluN2B
	WT	Homo		WT	Homo		WT	Homo
1	1.06353	0.475271	1	1.11589	1.24997	1	1.11749	0.408059
2	0.947723	0.408297	2	1.07858	0.98039	2	0.971649	0.323512
3	1.01456	0.468307	3	0.942169	1.11183	3	1.07407	0.272781
4	0.974182	0.437996	4	0.863355	1.21747	4	0.836791	0.378027
HT-P14
	GluN1			GluN2A			GluN2B
	WT	HT		WT	HT		WT	HT
1	1.16662	0.80495	1	1.02103	0.922378	1	0.964353	0.618754
2	0.86534	0.651036	2	0.968122	0.915658	2	1.12532	0.532463
3	0.975322	0.634483	3	1.04112	0.879406	3	0.898805	0.465788
4	0.992717	0.777614	4	0.969725	1.06801	4	1.01153	0.538292
HT-P21
	GluN1			GluN2A			GluN2B
	WT	HT		WT	HT		WT	HT
1	1.07763	0.892031	1	0.904028	1.0663	1	1.09765	0.611462
2	0.997099	0.810913	2	1.02916	1.17506	2	0.935351	0.464163
3	0.890364	0.631917	3	1.04055	1.05641	3	0.834952	0.574185
4	1.0349	0.624626	4	1.02626	0.843108	4	1.13205	0.747279
HT-P28
	GluN1			GluN2A			GluN2B
	WT	HT		WT	HT		WT	HT
1	1.1308	0.782308	1	1.09828	1.05087	1	1.05287	0.562606
2	0.970022	0.936019	2	1.01358	1.50793	2	1.01098	0.694499
3	1.11024	1.00488	3	1.14451	1.57119	3	1.00803	0.603178
4	0.788935	0.738766	4	0.743623	0.970169	4	0.92812	0.415192
HT-P56
	GluN1			GluN2A			GluN2B
	WT	HT		WT	HT		WT	HT
1	0.787783	0.568859	1	0.74094	0.956202	1	0.870049	0.536774
2	0.834692	0.637852	2	0.875093	1.05656	2	0.838463	0.562983
3	0.854385	0.694915	3	1.15297	0.994742	3	0.971731	0.628014
4	1.52314	0.921503	4	1.231	1.21276	4	1.31976	0.730554
C
	NMDA/AMPA ratio			Tau (ms)
	WT	HT		WT	HT
1	0.293321	0.233128	1	95.3836	79.3809
2	0.469338	0.160329	2	87.1618	67.9734
3	0.380306	0.238537	3	93.6542	59.3656
4	0.387247	0.139028	4	92.6268	58.0705
5	0.39084	0.292115	5	100.39	71.3329
6	0.381804	0.183944	6	84.3706	64.9484
7	0.177603	0.338889	7	64.5628	83.0037
8	0.284459	0.354715	8	88.3434	86.3702
9	0.354599	0.309046	9	91.4348	90.4942
10	0.393911		10	125.607
D
	NMDAR-EPSC (% of baseline)											Ifenprodil-sensitivity GluN2B component (%)
	WT											WT	HT
	1	2	3	4	5	6	7	8	9	10	1	44.4597	26.6835
0	94.159	97.7824	97.1339	103.337	104.635	101.07	93.9058	101.119	97.3049	96.5726	2	25.6337	23.5398
1	106.513	106.243	101.045	106.851	97.1136	105.179	95.097	100.61	103.598	100.674	3	27.111	8.29038
2	95.1036	102.151	107.091	104.159	97.2241	100.375	99.0097	100.583	105.102	103.329	4	34.7717	31.8311
3	98.0793	87.2943	101.463	88.9738	102.605	96.598	107.583	102.912	95.849	99.0186	5	16.0973	0.143999
4	106.145	106.53	93.2677	96.6794	98.4221	96.7781	104.404	94.7754	98.1461	100.406	6	39.5005	17.5691
5	96.6337	93.1308	91.6679	115.789	94.3828	106.847	104.098	103.18	111.072	86.6991	7	50.5422	28.6551
6	95.6083	91.2577	92.0287	113.118	93.6967	101.788	98.1791	99.4772	97.8064	85.6103	8	36.3435	19.3205
7	98.7091	89.701	95.8103	96.4739	95.2946	97.9013	94.85	99.1203	91.465	83.3731	9	16.8921	13.5041
8	92.9871	74.7674	93.8324	80.3641	80.2747	81.3265	89.5391	105.41	87.356	81.7176	10	35.2225	6.93694
9	87.8942	83.9933	87.4011	94.8712	81.2243	73.9308	79.6041	95.3063	86.7089	76.3185
10	78.0292	81.0861	80.3976	102.721	78.6571	76.4261	69.3552	87.7451	94.1989	77.8248
11	76.2051	75.2937	80.7583	84.2683	99.1749	69.6692	72.3311	79.7825	86.1589	74.1558
12	71.5594	71.1095	74.6504	93.0013	79.4417	59.5404	68.4264	90.4886	94.4901	78.6451
13	68.6329	71.2383	81.5296	90.4944	79.3038	67.3777	64.7507	86.6522	94.3445	70.8149
14	66.8535	65.5931	76.8398	98.015	82.8161	67.7892	63.2268	82.682	90.2517	66.6836
15	66.1365	64.5148	78.9173	84.5354	74.3149	66.4366	55.424	75.8569	83.7809	67.5039
16	61.4615	73.4132	77.8599	64.5009	75.1858	62.9746	56.4443	75.79	80.3837	67.6083
17	56.3424	75.0397	82.0023	60.494	77.556	65.0025	53.0302	84.8902	86.6766	61.9705
18	58.3484	73.1261	72.3989	64.3365	74.012	62.7237	50.4925	68.2066	85.803	60.315
19	55.8444	70.9843	72.1625	58.2337	83.7248	58.8759	44.4948	70.1024	81.4029	58.391
20	55.3448	69.7736	76.5786	62.1378	81.8135	60.2157	55.3193	77.0614	86.8869	64.0586
21	56.8944	75.2274	72.5979	61.357	76.9124	62.6144	42.2318	61.3145	88.1972	63.0146
22	61.6265	72.2135	68.1818	60.8638	84.3246	59.6647	55.4894	58.5265	84.4927	66.609
23	52.4538	71.6615	72.3864	61.994	89.8664	60.9595	43.5334	62.9204	78.6204	63.3427
24	51.3821	82.9555	74.7002	79.7888	86.5965	59.0431	50.7148	58.4596	77.3424	66.8625
	HT
	1	2	3	4	5	6	7	8	9	10
0	87.8269	91.09	97.4229	105.588	91.9537	106.508	110.043	100.218	102.54	101.462
1	105.489	108.721	93.1029	101.177	105.443	101.117	97.5988	93.3606	103.24	99.5052
2	100.917	96.1317	105.298	103.865	100.496	101.216	93.0123	102.13	103.065	100.377
3	104.662	100.112	100.828	96.5868	97.3806	96.6401	96.4185	100.954	92.2791	98.3237
4	101.105	103.945	103.348	92.7832	104.727	94.5186	102.927	103.338	98.8761	100.332
5	105.692	108.028	104.671	104.166	114.734	101.463	108.323	105.701	96.3486	98.7003
6	100.137	100.289	105.327	105.854	98.4679	105.287	101.497	95.91	103.248	93.6125
7	95.9402	105.817	111.942	96.9584	119.147	93.7539	85.8222	98.866	94.2105	99.0622
8	98.265	92.4463	113.973	95.7226	116.502	94.5926	88.6011	98.4814	115.663	97.5927
9	95.1133	102.5	111.677	91.5536	114.034	91.4103	94.5636	96.5034	107.015	93.066
10	91.8523	96.4855	108.83	90.6709	129.991	82.4432	82.5577	99.8989	106.721	95.754
11	86.1262	91.2079	109.503	85.6873	118.755	89.7945	73.0878	91.1848	111.554	104.305
12	84.644	89.7043	111.303	91.4886	109.028	83.9233	70.6866	87.8003	100.617	87.3357
13	87.3588	85.3407	116.095	92.2102	97.6892	89.0421	78.16	91.1738	105.879	97.4524
14	84.0979	91.9303	106.213	83.4355	103.292	90.5222	73.4386	84.5915	96.4599	89.9941
15	83.8482	86.063	93.4825	77.3648	113.607	87.3523	77.5934	88.6794	102.262	87.7861
16	79.8384	80.9476	98.8553	75.8812	96.2884	87.5866	73.1148	84.9981	95.4266	98.3237
17	80.4937	78.3678	95.2428	75.9215	92.5072	83.7136	72.899	83.8553	96.5393	98.464
18	78.1377	83.3505	93.1546	77.2378	98.9136	92.7301	74.7875	82.3718	103.081	93.9891
19	72.3023	78.9575	89.2775	72.9078	106.471	83.3066	78.0791	81.7674	97.8031	87.5868
20	77.8724	84.7363	95.9618	73.1339	97.6402	86.1682	76.2444	76.1522	87.3512	87.3062
21	76.3122	77.8223	93.2409	71.4087	103.454	78.2125	71.8198	83.13	94.0197	90.9171
22	70.3832	72.1172	83.5078	67.3914	107.941	88.1787	70.0931	79.5697	84.4342	93.7158
23	72.4427	72.3973	95.0472	65.2233	105.041	79.0512	68.1236	80.207	82.0974	90.4888
24	69.5719	75.2278	90.7904	63.687	85.2043	80.5437	70.4438	84.3388	84.5772	102.887
E
	fEPSP slope (mV/ms)
	WT
	1	2	3	4	5	6	7	8	9	10
0.05	0.153411	0.140865	0.188079	0.158174	0.128196	0.186615	0.136652	0.117774	0.15887	0.12935
0.1	0.263302	0.282702	0.298034	0.307772	0.28691	0.387013	0.276669	0.255355	0.311259	0.278488
0.15	0.367233	0.424926	0.403363	0.450689	0.440935	0.563576	0.407398	0.371144	0.446551	0.398951
0.2	0.476448	0.569113	0.523674	0.591106	0.586041	0.729093	0.536469	0.474438	0.565692	0.54061
0.25	0.580415	0.704335	0.628657	0.726133	0.719935	0.88363	0.65851	0.600466	0.711421	0.667792
0.3	0.675692	0.845957	0.745003	0.853483	0.86172	1.02755	0.773267	0.702393	0.833312	0.808068
	HT
	1	2	3	4	5	6	7	8	9	10
0.05	0.106196	0.194311	0.0946885	0.181231	0.148236	0.15494	0.105199	0.120778	0.12674	0.125342
0.1	0.267387	0.370898	0.248965	0.347385	0.285075	0.312003	0.253349	0.245011	0.24885	0.246207
0.15	0.406152	0.557561	0.404904	0.501285	0.435002	0.474279	0.415735	0.36591	0.37455	0.373731
0.2	0.554098	0.735094	0.548029	0.665982	0.592752	0.642269	0.568335	0.472047	0.493195	0.499226
0.25	0.70271	0.909213	0.706245	0.805122	0.743385	0.780354	0.714976	0.58523	0.607419	0.609785
0.3	0.841986	1.0932	0.855871	0.948057	0.889843	0.92484	0.868913	0.699125	0.71646	0.733336
F
	Paired-pulse ratio
	WT
	1	2	3	4	5	6	7	8	9	10
25	2.07178	1.97865	1.95816	2.2839	1.8173	1.94818	2.09625	1.7656	1.77556	1.76871
50	2.07484	2.04956	2.06211	2.19445	1.92194	2.04553	2.02545	1.945	1.76494	1.96061
75	1.99606	1.87238	1.79171	1.95201	1.79228	1.97979	2.22255	1.9828	1.81433	1.82568
100	1.75199	1.87697	2.01517	2.02485	1.91339	1.80234	2.13937	1.70637	1.74827	1.78508
200	1.51164	1.64652	1.54433	1.5357	1.50712	1.46221	1.59022	1.58186	1.45819	1.51867
300	1.24393	1.38946	1.36839	1.28949	1.23812	1.29515	1.28517	1.23323	1.34191	1.30146
	HT
	1	2	3	4	5	6	7	8	9	10
25	1.8326	1.66548	1.90911	1.82892	2.04722	2.12708	1.67663	1.72534	1.87272	1.66845
50	1.9638	1.7778	2.0413	1.86214	2.08297	2.23412	1.99078	1.80163	2.01228	1.83251
75	1.79726	1.66536	1.80308	2.00185	1.82144	2.15803	1.76747	1.94859	1.90748	1.85064
100	1.85187	1.65306	1.78086	1.71854	1.80035	1.97308	1.71162	1.64369	1.78421	1.8439
200	1.36879	1.28215	1.47285	1.40475	1.49949	1.54169	1.48102	1.53002	1.46177	1.47524
300	1.22336	1.18361	1.26918	1.26764	1.11308	1.2416	1.31204	1.36787	1.18394	1.38066

## Sheet: Fig2
A
	Long term depression (LTD), fEPSP slope (% of baseline)										fEPSP slope last 5 min (% of baseline)
	WT										WT	HT
	1	2	3	4	5	6	7	8	9	1	75.4468	86.4559
-20	102.585	103.171	94.3437	98.1608	99.5787	99.9817	98.1706	100.011	99.4918	2	74.3458	95.6833
-19	107.422	96.067	100.194	99.2517	104.21	102.909	97.3088	102.742	96.9207	3	89.1502	84.2882
-18	99.5164	101.395	95.2314	102.956	103.503	100.201	100.159	100.99	92.827	4	75.765	81.9792
-17	99.7023	99.2072	100.921	99.0362	106.03	98.3714	96.4471	98.033	92.647	5	68.9932	93.6337
-16	106.213	97.1607	101.829	98.0259	102.1	102.763	97.7724	101.626	99.6201	6	83.3083	96.1895
-15	102.213	102.023	99.9325	101.07	100.894	96.3953	104.203	99.6289	99.4478	7	79.7818	81.3995
-14	98.4933	103.344	101.99	102.174	98.3453	97.3467	100.888	100.147	97.9617	8	67.9852	96.4275
-13	98.6794	103.322	104.28	101.542	100.034	102.763	101.153	100.138	107.076	9	68.0034	85.9787
-12	95.1451	95.0275	99.6602	104.559	100.79	100.348	97.9054	99.7268	97.4808
-11	101.097	102.413	100.376	100.693	99.0249	101.08	101.551	99.8932	97.7888
-10	96.9122	101.611	100.982	103.117	100.28	101.885	102.214	98.1505	101.057
-9	99.2373	109.603	100.074	102.188	102.012	102.104	99.4963	95.2432	98.1917
-8	105.469	98.8608	103.716	102.215	96.4923	100.055	99.7615	97.2698	100.949
-7	97.7493	105.076	104.069	97.0428	98.016	99.7621	100.557	102.693	100.964
-6	96.9122	90.3065	100.962	98.7131	99.1343	99.4693	98.0376	102.253	109.59
-5	99.5164	98.471	98.0964	101.165	97.6653	100.567	101.949	99.2863	104.792
-4	97.0982	97.1499	98.833	94.9822	98.8492	99.323	99.894	101.842	99.2185
-3	97.5632	101.124	99.8921	97.7837	95.8451	96.3952	99.7614	101.528	100.684
-2	98.2143	99.9007	97.6925	95.7632	97.3582	97.9323	99.8277	99.1005	101.546
-1	100.26	94.7676	96.9262	99.5617	99.8359	100.348	102.943	99.6976	101.747
0
16	72.1726	40.6708	35.7526	38.3659	42.457	57.5316	47.518	45.0613	56.0935
17	72.4517	46.3882	43.7928	44.6088	46.8154	60.8767	58.8723	50.4653	62.9376
18	76.8229	44.3847	46.9958	49.498	56.9457	67.432	65.8879	56.7113	61.6449
19	73.1957	49.9828	53.3462	57.0539	58.7657	75.2425	70.1964	57.9447	69.171
20	84.9144	55.3969	57.825	60.5288	65.0808	76.8531	75.9632	61.4201	70.1769
21	80.5432	55.7758	61.4971	64.0845	68.5015	83.1473	71.3899	65.845	76.9992
22	83.5193	61.8066	67.9536	68.5561	70.7162	85.8555	82.3266	67.5874	70.7006
23	81.4732	60.2799	71.1809	70.0377	73.5887	88.4172	81.2661	70.4559	78.3785
24	86.6815	60.876	72.9363	69.6337	75.9135	85.3431	80.4047	74.0093	77.6021
25	85.8445	65.7483	75.7306	77.1226	75.8692	87.0997	81.266	71.327	74.6721
26	80.9151	67.4375	78.3834	75.964	74.6467	88.71	83.8512	74.3226	75.2326
27	83.0543	67.4593	75.6702	81.0825	77.0973	88.4904	81.9289	72.2865	75.4335
28	78.125	70.6642	76.6085	77.9576	79.224	90.9058	83.586	71.1312	71.0742
29	87.3327	70.2961	79.7957	80.2339	79.0162	89.5883	85.0443	73.5982	76.0149
30	74.5908	70.3394	86.9279	83.8166	76.8065	90.1738	82.3934	73.794	85.9331
31	80.9152	70.8591	81.4306	77.1629	78.7855	91.5645	85.2432	75.7519	83.1613
32	79.8922	69.9496	80.4219	76.7454	81.3291	93.1748	88.6238	76.1826	84.5401
33	78.311	71.5522	84.5976	81.5539	79.8163	89.8079	90.7448	75.4386	85.5024
34	79.2411	72.072	84.608	81.271	76.7359	89.5883	83.9841	75.8106	87.7722
35	81.6596	73.0681	83.1852	82.2138	74.4769	91.7109	91.7392	75.6148	82.3708
36	79.5201	73.5012	83.1453	83.9109	74.3894	88.4904	89.9495	74.2443	83.4483
37	81.4732	77.2912	81.9246	82.8737	77.799	91.7109	88.4249	74.2249	76.1522
38	71.8006	73.7178	82.4794	82.9409	77.2018	88.0512	92.2031	77.3965	76.7262
39	75.3348	70.7293	83.0447	83.6953	72.6683	89.5883	92.0042	76.1829	79.6637
40	78.2179	77.6159	86.7161	80.6514	75.8636	89.5883	91.6729	74.9883	79.3693
41	71.894	75.9701	80.6236	81.7421	75.656	91.7841	86.238	77.2399	87.9732
42	76.916	77.4426	85.748	84.4361	74.9488	92.3696	90.7448	78.1994	82.0692
43	78.497	75.6669	83.529	82.254	73.5178	90.7593	87.9609	75.4975	83.9653
44	78.032	75.0172	85.0223	83.3452	76.023	90.3202	91.01	75.1449	78.4285
45	72.9167	78.5906	85.95	80.4492	70.3383	90.613	91.2752	76.6134	80.6335
46	77.66	73.6311	88.4519	80.9073	70.7161	90.4666	90.3472	74.5967	75.2759
47	72.5447	74.9305	90.8825	81.8093	70.3545	89.8811	87.1655	74.6163	80.9207
48	70.7776	77.356	86.0506	82.0656	72.6184	89.8811	90.546	74.7533	79.2761
49	75.801	74.3025	85.183	79.3179	69.8502	89.076	86.5689	73.559	76.3961
50	70.1265	76.6197	85.0825	80.2331	71.38	88.0513	87.8283	72.4626	78.9238
51	73.0096	77.7677	89.8437	79.9506	67.6796	89.5151	86.569	72.5213	82.1705
52	74.1261	75.3637	88.472	77.2435	72.1859	88.0512	84.0501	74.0291	82.1841
53	71.2426	77.4427	90.3885	79.1964	71.1992	86.5142	84.4483	72.7563	78.7949
54	73.8468	80.7344	86.4242	77.4725	71.0895	86.8801	86.3037	72.443	76.2376
55	76.5439	76.2948	88.8453	79.8568	71.5939	84.8307	84.5803	71.8361	75.8928
56	74.3121	74.205	88.8453	79.7892	72.0541	85.5627	82.1278	71.3661	77.7889
57	70.9635	75.7324	87.0399	78.927	71.3746	86.2947	81.9952	72.3748	78.7808
58	76.9159	81.2978	89.1686	81.7418	72.0105	84.538	84.1826	72.0909	75.1176
59	77.66	78.2333	87.8672	81.3651	71.2211	84.3916	82.5918	70.0545	79.5988
60	73.4484	74.6706	87.4839	81.9983	71.1334	86.7338	81.2665	70.9847	78.9525
61	73.9408	75.4503	91.8314	84.5705	71.7035	86.5874	84.8469	67.1958	80.8915
62	77.3812	74.2376	91.3576	80.4224	74.9488	89.2955	83.0563	59.1095	69.5733
63	73.1957	74.7358	89.5619	78.146	70.1247	87.3925	80.7276	69.0759	74.1698
64	77.1019	72.375	92.0539	78.1461	71.2211	84.9771	81.5983	67.9009	63.1245
65	72.7307	76.1001	90.8331	78.5637	70.936	86.807	73.909	69.4084	69.8314
66	78.3114	77.9193	92.5787	78.6311	70.9799	84.538	77.3478	66.4322	70.7438
67	78.7364	72.8515	91.9427	78.8196	71.7693	86.5874	77.1584	70.3776	69.7168
68	73.8075	75.2665	91.7006	76.5433	72.142	86.5874	74.9232	67.519	70.5499
69	77.195	73.3714	92.1547	75.1427	71.5281	87.0997	81.8653	66.6967	70.3058
70	77.3809	72.5917	89.8244	74.1056	67.1425	83.4401	79.4216	66.4325	70.3632
71	74.5908	74.6706	88.2608	75.5198	67.7565	82.0494	79.4788	69.0759	68.6827
72	72.2664	73.7178	90.3691	74.4827	69.9931	81.3175	81.0034	67.8424	64.1441
73	72.824	72.635	91.0146	75.9912	68.0197	83.5865	79.8667	67.7052	69.0347
74	81.2877	75.2121	85.6478	75.237	70.5852	84.3916	79.2137	66.364	67.3039
75	76.2649	75.4936	90.459	77.5941	68.6117	85.1967	79.3462	68.9388	70.8515
	HT
	1	2	3	4	5	6	7	8	9
-20	100.819	98.833	98.8644	100.201	100.579	102.069	100.802	93.4196	97.2939
-19	100.448	98.1137	101.482	99.3953	99.3526	100.473	100.568	97.2241	99.9408
-18	101.629	103.56	102.231	97.0939	98.9098	100.323	100.234	93.5291	101.73
-17	103.476	101.865	101.758	91.4384	106.919	103.423	103.177	102.305	106.451
-16	99.0744	101.916	100.785	105.297	102.928	100.641	104.782	105.461	102.771
-15	101.851	98.6788	97.4037	100.587	99.625	101.593	99.7655	100.457	99.393
-14	99.4523	101.993	98.7979	99.182	104.025	97.1311	101.304	95.6845	99.5026
-13	101.791	100.94	104.534	100.053	102.485	99.614	99.5249	97.1482	97.011
-12	101.863	101.287	104.073	97.6527	100.163	98.0085	100.776	96.0149	99.6486
-11	99.938	101.659	93.8777	98.6062	99.9245	99.3899	101.752	110.696	94.4088
-10	96.3161	97.1374	96.0754	106.251	101.103	101.126	101.023	98.6097	103.885
-9	98.9125	99.2954	103.889	100.661	98.2967	103.329	97.6184	99.5334	101.877
-8	96.6818	99.5523	93.865	103.226	98.0579	99.7634	100.294	106.078	101.21
-7	98.8406	99.0901	103.429	100.349	98.7528	97.0751	97.4311	106.538	103.428
-6	99.8119	95.2169	103.508	98.1786	100.36	100.659	98.4411	95.4211	97.3126
-5	100.79	96.8804	99.9036	107.007	98.2895	97.8032	99.6987	96.5428	101.986
-4	99.698	97.7797	107.573	101.943	98.5689	101.593	99.5784	107.847	99.5305
-3	100.418	99.366	95.7854	97.6856	97.1656	97.7098	97.5247	98.9176	94.5645
-2	99.758	102.635	97.2459	96.0584	96.1983	98.6059	99.8124	96.0374	100.58
-1	98.4327	104.202	94.9175	99.1325	98.2964	99.67	95.8927	102.536	97.476
0
16	29.5269	47.5606	35.1564	46.286	44.9858	36.2787	39.7325	47.255	42.3204
17	35.9672	50.9262	48.6821	48.3328	49.8359	48.6868	45.3045	59.8469	56.4924
18	45.1481	56.7581	49.4057	53.5444	56.4026	55.1598	50.9099	66.5002	64.7219
19	50.9767	59.9246	54.4778	54.8263	62.4516	64.6479	53.9936	70.7562	69.2774
20	56.5055	65.4288	58.9777	63.2114	63.6505	67.8776	58.6626	78.8943	74.4164
21	58.7964	71.7291	59.9779	63.2933	64.2772	71.0322	64.8834	79.4761	77.7845
22	62.5143	72.6026	68.1157	64.3126	68.2826	75.6996	69.4654	79.0913	82.3672
23	66.5919	79.9502	67.7738	66.2196	68.4188	79.1021	67.1576	85.6465	83.1157
24	72.1865	81.0292	67.6679	65.8743	68.95	81.6361	72.5088	86.9991	81.8925
25	74.2675	83.0331	77.6676	69.6886	71.1981	82.051	74.6828	79.6526	84.1481
26	73.2182	86.7004	74.7594	69.4422	72.5876	84.5484	79.8596	83.5017	84.878
27	77.8355	88.5694	73.8653	71.1185	71.8996	89.2755	75.9537	88.0765	87.9451
28	74.8072	90.6825	74.9441	73.2397	73.5004	86.5732	78.9834	90.6837	80.6244
29	76.8461	90.8046	75.1017	70.6255	75.9664	87.9363	78.8498	78.3221	87.0145
30	75.0271	87.6702	77.2723	75.2616	75.2852	89.794	76.4418	84.194	86.2843
31	78.9149	94.4912	82.7461	73.2559	76.7293	90.0549	77.9535	85.4697	86.7407
32	74.4475	93.1039	76.2076	70.9544	78.6366	89.0844	78.7297	86.8113	82.9432
33	80.8038	90.9136	78.6147	74.3081	78.9636	93.9378	79.6257	87.4826	92.4629
34	78.825	94.6453	78.2463	79.2237	77.8465	92.3975	80.3414	83.0616	87.507
35	80.5939	94.8701	81.3909	78.8784	78.8547	90.541	81.0706	86.151	87.6526
36	84.6114	90.098	82.1408	80.1938	79.0998	97.1576	80.9033	89.4406	85.1244
37	82.1531	89.2824	81.6544	78.0893	78.9703	95.1424	81.5583	87.2406	85.8821
38	83.3761	89.5649	91.5482	71.7102	74.3928	95.4696	80.2478	86.3169	88.6567
39	79.9943	92.0506	81.1938	78.8127	77.0084	94.0695	81.5786	87.2511	85.5722
40	80.2941	91.4341	83.9955	79.306	79.7129	92.6321	81.3646	93.6089	83.9838
41	85.283	93.0012	82.5755	75.0807	82.3696	93.0889	82.2278	84.8318	86.4563
42	82.0032	92.8984	88.7847	75.5246	83.9567	91.6141	81.175	89.9245	88.6388
43	85.2288	95.9557	85.8126	76.9053	83.7727	91.9128	83.8328	82.9847	89.1406
44	85.8942	96.5465	82.7596	82.8736	83.405	95.7678	81.0373	96.1598	87.1327
45	88.1729	88.351	87.6796	77.1768	83.9771	85.3701	80.8094	92.7502	89.4783
46	84.4613	94.6389	87.2989	81.246	85.6665	94.9837	78.8497	92.1019	90.0809
47	90.2357	94.7738	87.2195	76.8729	82.9963	91.2879	82.5684	86.8448	85.645
48	87.3516	96.1931	83.1676	78.6155	83.1869	94.3117	81.8663	96.1269	86.4841
49	88.029	97.375	83.4969	78.0237	87.7101	94.8713	83.1776	91.1881	92.3351
50	88.6526	97.8438	86.2064	83.2186	86.811	92.5195	85.0837	89.2971	86.0189
51	87.4176	95.0563	86.9704	86.5726	83.3504	94.4611	82.7292	91.2986	89.3412
52	87.2319	96.3602	88.2199	82.7257	83.4321	91.6883	84.3611	90.0004	88.0454
53	89.1865	96.5722	86.1678	83.8432	86.4567	95.7201	84.6489	94.9177	88.7663
54	88.6286	99.6037	86.4174	81.5253	87.1651	88.1041	82.5218	94.9282	84.8783
55	85.457	96.5079	87.4446	83.4652	85.7483	88.1879	84.2808	94.9176	87.0322
56	87.6094	99.9377	87.1547	74.9	86.7223	84.5473	81.8866	87.8675	87.8624
57	87.4176	97.2721	86.181	72.7954	88.1188	88.0572	83.1509	93.453	87.3881
58	86.6618	95.005	92.3767	78.632	90.5234	89.1209	81.3377	101.384	82.7056
59	85.1209	95.8656	93.9166	77.4318	89.0725	88.5053	84.0667	94.2904	85.4073
60	84.8211	95.1849	86.7599	80.3987	87.4375	91.2771	82.1676	92.6298	87.7897
61	85.7386	99.7449	90.5347	81.3611	86.6815	92.2762	82.5954	90.9133	84.7643
62	85.781	97.0089	83.4706	82.0519	92.2332	92.4629	86.6422	100.383	88.9216
63	84.875	98.165	89.9567	72.9272	89.2499	95.1321	85.2108	94.4223	86.6579
64	85.1813	97.7538	90.2856	76.8725	88.2551	90.0358	83.3512	90.9022	86.2106
65	84.7851	94.9407	95.1397	80.572	90.6529	94.0778	80.6692	96.0059	89.0951
66	85.6486	99.4945	88.1405	80.72	89.9511	94.6192	83.4454	98.2818	83.3258
67	85.9546	102.738	83.9171	79.1084	90.7073	89.7753	81.1306	97.655	84.5393
68	86.53	99.4626	90.615	85.7339	90.5166	94.0685	82.0065	96.3682	86.6578
69	84.5694	99.1926	89.061	81.542	90.9798	91.3154	78.5753	102.978	87.3242
70	88.6286	94.3434	88.2726	80.7364	90.7618	93.2565	81.0371	94.8393	86.3657
71	87.022	96.341	87.5221	78.6649	92.8598	95.3753	82.7022	95.8395	83.7916
72	85.1214	98.7046	86.4823	85.9646	92.8326	93.3503	79.4379	98.3049	89.1405
73	86.8056	94.1316	82.5223	82.5282	94.6583	94.6669	83.2447	96.0269	86.9316
74	86.8841	95.4418	80.4445	84.0737	93.5138	99.5196	80.2211	100.052	82.8331
75	86.4461	93.7976	84.4696	78.6648	94.304	98.0355	81.3914	91.914	87.1967
B
	mPFC PrL layer1 Long term depression (LTD), fEPSP slope (% of baseline)										fEPSP slope last 5 min (% of baseline)
	WT										WT	HT
	1	2	3	4	5	6	7	8	9	1	75.7332	97.4241
-20	103.722	95.2042	94.4296	101.329	100.857	96.8385	100.799	98.6232	104.383	2	95.7055	114.196
-19	101.915	99.8496	99.549	99.6141	98.4911	96.4985	100.455	102.994	101.22	3	71.9868	79.5153
-18	100.241	100.652	97.6701	98.0001	102.441	100.492	99.9475	95.0244	100.026	4	86.0162	132.261
-17	101.993	101.43	98.3005	100.472	102.15	99.9141	100.652	100.512	99.8241	5	90.9822	66.2491
-16	97.0957	101.861	106.728	100.724	98.1902	104.391	98.457	100.482	102.864	6	76.8284	103.661
-15	99.5052	103.133	98.9308	100.119	97.4979	99.9144	102.184	102.603	102.042	7	91.5255	92.8591
-14	92.3657	102.837	100.315	101.279	96.4856	94.9206	102.208	102.851	102.305	8	80.8816	103.728
-13	96.4487	102.002	104.207	100.421	95.2221	98.3086	101.643	104.455	99.0332	9	76.6143	87.8021
-12	99.9961	101.854	104.286	102.691	96.796	97.9957	100.685	99.1025	99.2812	10		95.3779
-11	104.369	103.364	102.958	100.169	98.9614	98.2813	100.242	103.308	101.421
-10	95.6232	100.691	102.8	100.472	100.897	105.317	98.9156	100.842	101.375
-9	99.5722	99.5474	98.1761	100.774	102.13	102.513	99.2679	97.7458	97.6064
-8	112.178	99.8687	97.6131	102.237	102.201	94.6346	97.9985	97.2436	94.8925
-7	108.664	97.9026	97.2084	100.572	103.033	99.1254	98.9975	99.6651	101.825
-6	83.2965	95.5511	103.34	100.32	99.4623	99.0636	100.906	99.4253	97.7614
-5	96.0471	100.876	100.246	102.489	99.2326	98.7444	98.0966	96.3142	96.5911
-4	102.74	96.5594	93.236	98.9585	98.9819	105.806	100.627	94.5897	96.4743
-3	100.253	99.3414	98.8733	98.4037	100.957	104.759	100.152	99.5971	102.725
-2	102.316	101.243	100.629	94.5704	102.2	99.6556	97.9819	101.261	100.833
-1	101.658	96.2322	100.505	96.3862	103.814	102.826	99.7837	103.361	97.5178
0
31	72.1184	57.5642	47.5753	50.3373	54.4004	69.0908	60.0473	54.8201	37.0211
32	76.2801	68.4643	53.1683	58.5587	63.5653	71.894	71.9299	55.1055	48.9584
33	75.1531	70.0701	54.4285	66.4775	68.1476	71.86	77.4494	56.2071	52.8238
34	78.5165	73.4753	59.2336	68.495	71.4166	72.9014	74.2317	64.1148	57.984
35	82.3483	76.3922	55.0586	72.9336	73.5224	80.8756	78.474	65.374	60.031
36	85.6057	79.3863	61.36	73.9922	71.7575	81.0733	83.2732	69.2194	64.125
37	83.5531	80.5685	65.0621	76.8678	71.938	87.4075	81.5042	62.8589	66.1101
38	86.0911	81.5708	66.5587	72.6809	75.9089	82.2572	82.0775	65.696	66.0402
39	80.8423	82.4317	65.0621	76.9182	81.1943	84.1009	86.1311	69.9759	65.8502
40	84.9419	82.6116	66.5587	78.8853	77.413	86.9315	85.943	73.349	67.6026
41	86.632	80.1444	69.6306	75.6573	82.0463	83.7473	87.1551	72.929	74.0423
42	91.8976	80.26	67.1101	78.2794	79.3183	78.324	87.5975	73.9639	71.5843
43	86.7214	84.372	70.8909	78.9859	80.9829	81.6992	86.107	74.5935	71.4369
44	80.7866	85.143	70.4183	77.7754	81.9255	78.8757	88.515	74.7128	70.9448
45	82.1755	86.6593	71.206	80.2973	81.2139	85.7062	89.6287	73.1983	72.86
46	84.6798	84.372	73.4903	79.8427	78.2759	86.8838	89.2109	76.0769	75.2521
47	85.7955	86.5051	69.6306	77.4728	85.034	87.8021	87.106	76.0769	78.4157
48	82.2814	90.0126	67.6051	77.7754	83.2291	85.4893	87.8922	76.0469	76.7876
49	83.3579	89.7432	70.1591	75.2034	84.4123	88.2652	90.2592	70.5301	76.4038
50	81.5064	89.3761	74.9081	76.7165	85.1744	88.5715	90.2922	78.8576	76.4966
51	80.9652	89.165	71.8361	74.194	84.3025	87.5304	92.8879	75.417	80.0983
52	81.7684	95.1644	71.9149	75.3039	84.4524	88.3603	90.3327	82.3209	77.171
53	81.7014	91.8368	72.1512	74.4969	91.0305	83.2509	91.25	80.9189	78.9934
54	81.456	88.4197	76.3258	74.8497	91.9932	86.5505	89.1946	76.2868	76.7137
55	82.1699	85.4257	73.9628	77.0191	89.8272	87.0811	89.4238	77.3207	78.5437
56	83.9102	89.6533	74.5142	75.4051	90.088	88.449	92.8719	76.7963	78.0053
57	80.134	89.7175	75.6957	75.203	92.2138	89.5984	93.4452	80.9268	78.249
58	87.636	92.4022	77.1136	76.5652	91.7717	81.9444	91.3241	82.1336	78.2839
59	79.1188	92.1259	75.9321	75.7077	91.6723	83.2986	94.7638	79.5926	80.0055
60	81.7403	90.7841	77.2711	77.7757	92.8155	82.6793	93.8301	79.825	79.3966
61	78.5052	90.4371	73.8053	76.4643	90.7288	82.7474	92.4706	77.7633	83.7429
62	83.8766	88.5225	76.2471	74.4972	92.2338	82.4067	92.012	80.844	78.334
63	80.1506	91.9263	77.2711	78.1792	93.7275	83.3595	90.8981	77.0358	79.2803
64	83.9602	89.5368	78.1375	74.3964	93.6578	85.4146	90.2757	78.0557	77.7954
65	86.883	92.5702	81.0519	74.1441	93.7074	78.4808	93.355	80.5965	80.4664
66	81.166	91.735	79.1616	69.1003	96.3648	81.7332	92.3638	77.4556	77.652
67	84.8974	90.9956	77.8224	76.2116	95.4623	82.298	92.4621	80.6266	76.5506
68	83.553	95.6344	78.5314	75.9599	93.4768	79.0116	89.3255	79.2999	77.4928
69	80.5189	90.79	78.6102	73.2362	92.2338	82.8765	91.0535	79.5473	79.1676
70	88.2328	96.2888	78.9252	74.699	89.4461	82.6586	92.0609	82.2164	79.8233
71	77.9196	92.8454	80.5794	71.5718	87.8417	77.0318	89.7267	81.6838	78.7217
72	82.2144	96.5586	74.8293	75.8083	89.5865	81.5427	90.644	77.2008	80.1368
73	79.5428	96.8735	66.6929	75.96	90.1882	79.2091	91.5121	79.7646	81.0368
74	80.1172	90.0442	71.9937	76.5147	89.5665	81.2093	94.0839	82.8751	76.6088
75	78.4216	96.1539	63.4075	73.9419	88.7442	84.1285	93.6172	80.2818	78.6946
76	76.9882	98.2676	69.7429	79.0861	88.2629	79.9641	93.4697	84.8993	76.5506
77	78.8567	101.416	72.7026	78.6827	92.7754	77.3785	92.872	75.8217	78.9546
78	73.318	99.1221	69.9793	82.415	92.1737	80.7944	94.0185	80.567	76.0466
79	83.754	99.7068	73.6478	81.3054	89.8472	81.0939	90.5215	79.1495	79.3614
80	77.8359	92.7491	70.4183	81.608	86.839	80.6382	92.5853	82.1786	80.5132
81	75.8001	94.3549	70.8909	78.3803	86.3175	79.7188	90.6362	76.6011	80.1368
82	75.5212	95.1841	70.0242	80.5488	89.406	76.8072	91.4467	83.2579	81.1722
83	74.1826	96.1538	74.9646	81.5575	88.3632	74.0102	90.0707	76.1964	77.4811
84	81.1101	98.8073	74.3567	84.0794	89.1453	78.9705	90.8244	81.4663	78.2371
85	78.0312	100.112	71.3183	84.2812	86.5582	74.6225	89.7762	80.672	77.2914
86	78.0311	92.0295	70.0354	89.1231	89.0851	78.1679	91.0948	84.7874	76.9577
87	73.2121	99.5269	77.1923	84.7352	88.7241	79.5551	92.012	83.063	76.2211
88	73.7866	92.0612	72.2301	83.6255	92.4138	75.8271	91.4141	80.2894	75.4731
89	73.2846	96.2827	69.5854	85.5421	92.815	78.5348	93.1013	75.8666	78.179
90	80.3516	98.6274	70.8909	87.0553	91.8728	72.0573	90.0055	80.4017	76.2405
	HT
	1	2	3	4	5	6	7	8	9	10
-20	98.4024	96.4817	96.3712	95.5651	101.09	105.747	103.167	99.8433	96.6827	98.4985
-19	96.4771	103.178	99.2509	98.9442	102.987	104.215	101.344	99.3708	97.174	101.211
-18	97.1015	98.2064	103.33	94.6356	100.95	106.112	98.9819	98.7414	93.0266	102.038
-17	97.9341	97.4962	106.07	93.9014	102.103	97.8912	96.3088	94.1002	94.1462	98.8855
-16	96.2689	102.163	107.993	96.6578	99.8125	100.569	101.255	100.708	94.7403	99.3572
-15	105.636	99.9311	101.874	106.35	98.416	105.82	102.754	94.1784	97.0481	101.231
-14	101.369	100.337	99.9503	103.773	101.23	101.954	102.604	100.394	100.498	102.331
-13	105.011	97.902	101.524	106.982	105.165	101.517	95.2096	101.495	101.16	98.2991
-12	102.357	96.9889	101.116	107.512	101.898	101.225	95.909	104.012	101.88	100.006
-11	99.0789	101.468	99.8919	95.0709	101.974	93.984	101.03	100.078	98.7387	103.577
-10	103.034	99.4238	95.472	90.9921	99.7205	98.0894	95.0346	99.4489	101.96	103.577
-9	99.2871	103.482	95.7883	97.477	96.5404	99.61	96.733	102.989	102.395	92.0688
-8	99.079	102.975	100.475	106.932	97.5427	93.4949	96.7085	103.619	105.079	101.011
-7	103.242	102.67	99.892	98.33	93.3921	94.5159	97.2331	97.0099	103.239	98.3835
-6	99.9636	101.047	105.079	102.58	101.057	98.3811	101.38	95.3577	105.125	103.096
-5	96.2689	95.8734	97.5779	99.1493	95.7425	97.0783	101.604	100.865	104.954	102.991
-4	103.762	98.8151	98.9012	107.034	101.359	98.1623	97.3081	101.338	101.161	101.808
-3	99.131	101.757	97.3531	90.9753	97.1114	98.2352	105.852	101.022	97.2764	101.231
-2	98.7667	99.4676	96.046	101.744	104.68	102.392	105.877	104.012	102.978	99.2525
-1	97.83	100.337	96.0455	105.395	97.23	101.006	103.704	101.416	100.738	91.148
0
31	68.9504	70.8165	59.3222	69.1139	43.9793	66.8008	56.6108	74.0375	56.5732	60.4034
32	77.4315	79.1362	64.8174	82.0147	48.6639	75.8441	62.3817	79.7019	69.4948	66.3506
33	81.4383	83.9042	71.4031	84.7798	52.055	82.6992	72.7619	84.737	64.9125	65.1038
34	85.6533	86.2377	67.5399	80.7277	49.2245	84.3349	77.2223	88.3567	68.2256	66.0992
35	82.9474	90.9046	73.3515	80.787	58.7561	82.3455	81.6192	92.2902	69.8193	72.863
36	88.9318	94.4551	74.1507	91.9987	56.4858	80.5332	78.2463	94.8856	75.6742	79.0205
37	85.2892	92.8894	76.7483	80.0192	54.481	82.3255	87.2034	97.0099	74.1083	79.6802
38	87.1117	93.483	80.6869	93.3816	56.3999	86.4204	89.8515	96.8525	77.6384	85.4712
39	89.0887	93.4387	79.8622	89.1831	56.5796	87.2747	89.1147	97.7967	79.5919	83.4089
40	89.6611	95.8731	80.062	92.7162	59.0145	91.5988	83.1314	97.8754	79.3129	89.6495
41	88.152	97.0908	78.197	97.6821	66.8695	89.3262	89.0147	96.3023	84.9266	89.1363
42	90.7543	102.468	82.8347	104.168	59.0307	90.3997	88.3026	97.1668	81.5679	94.3409
43	89.6095	97.6992	77.4644	110.738	60.8743	89.7755	87.4405	99.7637	80.403	97.6712
44	89.1932	104.497	81.0778	109.219	59.7314	92.6197	92.6002	93.6263	85.4758	97.326
45	88.1004	103.989	79.7292	102.357	61.9958	90.8164	89.6892	97.4815	82.6307	101.158
46	88.0472	109.163	85.1498	96.7345	60.5995	90.6498	91.9251	102.045	78.8268	98.0696
47	91.8979	109.555	82.0938	113.62	61.9418	93.0256	89.6392	101.81	85.8983	100.258
48	94.0834	109.772	80.8782	109.918	63.1979	91.3686	84.5984	98.583	84.2879	98.6143
49	95.6966	111.294	81.7109	114.748	66.373	91.7749	86.4911	102.517	87.4292	99.0326
50	96.8935	112.004	77.7514	114.322	71.2469	92.66	88.515	99.6845	86.8241	103.504
51	99.6514	110.106	78.4968	111.539	71.742	94.9535	84.6674	99.8418	80.5407	98.907
52	98.7147	109.366	77.6475	110.021	66.4273	94.5159	87.8397	97.1663	84.128	98.1526
53	94.2915	112.816	79.3294	111.471	65.2302	91.5258	92.6002	95.3567	85.5217	99.8598
54	94.916	115.352	78.0139	122.462	65.241	91.6082	87.9152	95.8288	88.949	101.891
55	98.3504	110.178	76.2321	105.737	63.4185	96.1709	96.5723	102.202	86.4128	95.6505
56	98.5065	107.236	77.8969	119.1	61.6023	98.765	91.0885	104.799	88.195	93.7446
57	98.6626	103.729	77.6969	128.571	63.9041	94.5561	92.912	99.9205	83.968	96.771
58	98.0902	107.54	81.6023	128.299	68.7665	91.8062	89.614	96.4587	89.7943	99.1901
59	95.9567	109.163	80.8032	116.471	64.9493	96.0463	89.6017	95.5927	90.8911	92.4465
60	97.3096	118.497	85.291	126.762	65.4999	100.348	90.4012	99.2124	86.8241	96.844
61	100.12	114.642	81.1438	122.393	63.5857	94.3591	96.7344	99.6058	82.7342	96.2998
62	100.588	115.961	81.6767	141.49	63.2409	94.9942	89.7142	99.3687	83.6253	93.7861
63	98.6626	115.352	79.5785	125.568	66.7721	96.224	92.0878	103.146	84.2651	97.9229
64	99.2871	114.236	79.5952	124.954	70.1679	95.1713	91.8377	103.933	87.5781	93.4514
65	99.183	110.584	76.881	117.376	71.9792	96.1615	89.9515	99.7626	83.3054	98.4986
66	97.3617	112.511	80.6442	125.243	67.6885	96.412	90.5319	103.068	88.423	99.2521
67	97.4657	112.004	81.3603	128.777	67.214	96.6308	93.4746	99.29	88.035	96.5616
68	98.5065	109.975	79.5786	122.487	69.5323	101.069	91.7256	101.651	82.163	94.4358
69	99.0789	114.135	80.894	122.547	67.9687	97.2555	87.7403	93.1532	91.0278	96.4146
70	96.4771	110.482	79.5789	116.864	63.9094	98.3811	88.7146	105.271	85.1333	93.849
71	97.4137	120.628	79.3953	132.36	68.9231	100.496	89.0394	101.495	88.2178	93.3467
72	97.3096	116.062	81.0272	129.203	67.4727	98.8187	87.5651	99.2144	86.7098	96.3102
73	98.6106	117.888	77.0808	133.725	68.4701	101.955	96.1722	100.552	87.738	98.9593
74	97.9341	114.845	76.9476	145.04	67.7961	101.152	94.5608	102.281	88.2178	94.687
75	101.473	114.439	80.511	129.424	66.6749	97.9014	93.6862	102.281	88.035	102.184
76	99.6513	121.845	77.4139	141.746	64.6857	100.496	93.2116	95.9069	85.179	92.7393
77	98.8188	119.106	79.9694	132.138	64.5401	102.59	95.4978	102.516	83.8538	96.4665
78	101.056	114.758	78.2963	131.847	64.7774	103.527	99.3951	96.3789	87.2353	95.3046
79	98.5065	116.569	76.9055	131.506	62.1412	99.4328	93.2493	98.7393	87.1439	99.6186
80	98.5065	111.744	76.0651	127.001	72.0654	101.079	90.1137	98.3465	84.2875	97.4726
81	97.882	117.744	79.2289	117.99	66.7986	101.444	88.6147	96.3002	88.5606	103.357
82	100.484	116.454	82.4925	126.25	66.0925	101.839	86.0911	99.7626	88.9261	98.6656
83	98.7667	118.7	81.9931	128.759	68.8307	95.5369	91.7503	102.674	87.2353	98.1739
84	100.484	120.526	77.6637	125.397	71.3327	101.079	93.2493	99.054	88.7433	96.9064
85	98.2463	115.656	82.2761	125.482	71.117	100.131	87.0285	104.405	87.2582	98.2259
86	99.8595	114.236	77.3139	136.712	64.9715	103.34	92.0873	107.395	85.9787	96.3731
87	96.0087	113.904	79.6285	131.575	66.7828	102.392	94.2354	103.618	86.6184	96.9068
88	99.7034	112.498	81.4602	139.169	64.3247	102.757	90.8874	101.572	89.3604	95.367
89	93.4589	117.484	79.5619	129.903	70.1898	105.966	98.1462	102.438	88.138	96.1
90	98.0902	112.86	79.6119	123.947	64.9768	103.851	88.9392	103.618	88.915	92.1425
C
	mGluR-Long term depression (mGluR LTD), fEPSP slope (% of baseline)									fEPSP slope last 5 min (% of baseline)
	WT									WT	HT
	1	2	3	4	5	6	7	8	1	70.2011	57.6649
-20	95.3663	97.2796	93.2688	104.744	103.746	95.2924	98.6441	95.8919	2	47.5464	99.1724
-19	96.0839	99.8645	100.66	98.5346	102.391	96.8713	98.1951	94.8414	3	80.3818	56.3134
-18	101.35	101.63	102.031	99.5901	96.6518	91.2684	96.2917	92.2591	4	34.6948	51.2817
-17	98.2913	98.7927	100.291	96.4591	93.5873	98.714	96.5001	98.7741	5	56.7033	53.1135
-16	98.0238	97.4057	98.7094	100.144	106.495	100.995	97.5607	97.5735	6	62.2161	84.574
-15	102.126	100.558	99.3923	96.815	101.248	95.4998	100.651	96.0871	7	44.0864	82.1316
-14	103.423	99.6753	102.822	97.9894	99.6327	91.6066	102.287	105.29	8	78.2424	56.2444
-13	97.0088	103.71	92.6506	99.7308	98.3237	104.067	101.486	99.8401
-12	100.014	101.377	98.0225	104.322	95.8533	93.9134	100.778	100.201
-11	100.071	101.441	98.8746	102.052	98.3787	101.434	100.058	100.38
-10	96.0677	97.1535	98.2861	103.741	97.8594	105.734	102.691	103.293
-9	99.7234	100.18	99.3929	102.158	102.734	109.068	100.728	102.227
-8	100.499	99.6123	106.723	102.29	99.5209	105.207	100.004	101.641
-7	100.285	100.054	98.97	103.565	97.5247	96.5587	100.955	107.391
-6	101.226	103.962	104.139	96.1953	96.9583	96.5086	101.213	101.867
-5	101.457	100.432	98.1791	102.932	106.217	100.995	101.359	101.747
-4	102.778	100.81	102.714	96.2481	101.954	104.417	93.5813	97.1983
-3	102.845	100.054	101.397	95.3504	99.6795	105.119	100.13	101.507
-2	101.846	98.6035	100.341	99.2555	97.8408	109.858	102.954	99.5398
-1	101.516	97.4056	103.136	97.8839	103.403	96.8714	103.933	102.452
0
1	105.048	98.2253	106.246	106.063	101.713	106.172	99.9811	103.713
2	103.265	96.0817	104.823	61.6059	56.1081	79.235	80.3263	106.971
3	57.8721	66.909	61.2188	20.453	17.5125	38.2081	26.9246	73.2845
4	30.3189	48.3371	44.8203	8.65669	19.5665	35.9769	11.605	66.3936
5	13.1856	30.0182	38.0179	8.55997	23.9682	21.1474	16.24	58.9032
6	12.257	16.1304	44.6096	17.3606	19.7662	23.3406	32.3598	58.4229
7	15.4303	15.2432	49.7238	10.977	19.2367	23.6293	19.036	60.8409
8	15.8759	16.5133	50.9742	11.7539	30.134	24.8576	22.7368	66.1999
9	14.8221	17.2922	51.6147	21.9159	26.9814	35.2749	19.4787	60.6607
10	18.86	20.0121	54.364	17.545	30.0878	40.8156	31.4624	76.7075
11	22.4629	23.2094	60.3751	21.863	29.8187	42.3952	18.4319	79.545
12	21.2219	24.182	60.8497	16.6963	30.8957	37.4805	17.8769	73.6606
13	24.617	27.9018	67.9682	23.1017	28.9178	36.4717	18.6743	80.0705
14	25.0918	31.6932	71.7116	31.1765	31.281	51.7707	26.1643	82.5923
15	31.1334	32.9092	77.3013	34.2986	49.9137	56.5718	38.8713	83.6279
16	31.2889	40.2406	86.1585	35.5473	54.7894	58.979	40.1691	96.2532
17	32.7718	38.9711	85.5776	35.1471	53.3178	65.1959	49.4453	100.456
18	35.3691	45.1586	87.9056	37.0248	60.6583	52.8232	46.8964	96.4627
19	37.262	48.2388	87.6862	41.1806	53.9132	59.4917	47.0173	93.8359
20	43.2419	51.8867	89.1861	46.4131	60.5279	63.6797	49.6958	94.4668
21	49.1515	55.4173	90.5873	50.085	44.6026	58.2142	48.6987	98.3552
22	48.0775	59.7674	90.3773	50.1095	59.92	54.9795	54.7296	98.9847
23	49.7503	61.2175	89.6391	47.996	45.5309	64.8445	52.9741	93.8367
24	50.3979	57.1195	88.109	50.832	46.5152	55.1934	54.3866	102.243
25	53.5359	57.6056	88.7955	43.7525	53.9816	63.6042	52.1432	89.1077
26	56.3204	55.9844	88.817	42.6533	53.0898	53.3252	47.5656	87.5319
27	55.2347	54.5977	94.3856	38.6664	49.9699	56.5851	46.4627	73.8411
28	56.0311	49.5352	94.332	38.0876	51.4464	62.0878	46.1153	87.3213
29	53.9512	51.7871	87.3185	35.4053	52.6537	57.1861	47.3164	87.6361
30	55.1108	54.1826	94.226	36.8358	48.5447	71.6037	47.4221	85.3244
31	54.756	55.2639	90.1066	36.1747	50.0999	59.5309	46.2362	91.3148
32	53.0474	51.2465	91.1687	36.119	41.2995	51.7201	43.9309	85.7448
33	53.526	53.057	89.7972	33.3238	52.5235	63.141	40.8806	82.4872
34	53.5096	51.9403	79.6738	33.3092	50.7681	54.0968	42.0438	83.9584
35	50.8106	52.3272	89.7982	31.6675	50.4434	56.3346	37.1908	92.3656
36	48.842	50.2197	89.8509	30.9786	54.4087	60.9599	37.4029	93.7307
37	52.1022	49.4272	78.8829	32.2906	52.2266	57.3239	39.0587	90.6834
38	51.5658	49.5173	87.0708	30.7807	46.5571	54.0523	34.7621	90.4737
39	51.9991	48.9949	91.9069	32.5924	51.0283	62.514	37.6099	87.0053
40	49.7499	49.5173	83.3648	33.0059	47.4067	66.6889	31.4385	89.9478
41	50.0594	51.0576	86.7398	31.6309	47.8154	58.8793	36.5599	83.6427
42	63.7322	48.2784	85.8962	30.6943	44.5375	55.4569	36.3861	85.8498
43	71.5614	48.184	85.6853	33.4849	47.1053	58.3394	37.912	95.6218
44	72.952	44.0413	87.1617	34.2545	46.7539	64.8208	38.3607	96.6724
45	74.9455	46.3916	83.3652	32.273	43.4135	61.7126	43.9776	88.4762
46	75.2629	45.3743	82.9433	35.1559	46.5061	61.1726	45.2617	93.9409
47	71.6852	47.027	84.3143	28.5382	48.1032	60.3832	46.9462	95.8322
48	72.944	47.009	83.1015	30.0699	48.6375	56.4092	46.138	91.5245
49	73.6242	49.9676	81.2257	34.1256	54.8451	67.1285	41.9457	92.5754
50	72.8488	48.1663	79.7414	31.2602	51.2792	62.828	44.8237	85.2205
51	73.5543	48.4812	85.1053	28.5676	53.0437	62.7148	48.096	86.3764
52	72.0149	48.0444	82.6793	29.8866	52.9969	60.7216	45.4204	85.2193
53	72.8408	48.0666	83.2896	27.6806	52.9785	66.6889	42.3007	90.6844
54	75.2138	46.7338	85.2706	28.6994	50.815	66.0368	39.6161	78.2844
55	76.1217	47.2022	80.4047	31.2279	47.936	62.5647	36.6037	85.8507
56	79.5343	46.1481	80.9924	30.4585	47.7689	59.6311	35.3362	84.4843
57	74.9907	47.1215	83.787	30.0406	38.9902	61.5995	36.8922	87.6366
58	75.1018	42.4648	77.9868	32.1469	53.0619	68.5316	37.0055	82.0674
59	72.6961	38.187	82.7848	37.5202	55.0121	71.1644	33.9403	79.9665
60	71.2971	38.5561	83.9298	32.4753	52.1522	62.7278	40.2838	81.0911
61	69.2297	42.9064	82.4161	34.1446	53.0437	66.8651	43.7888	76.4981
62	72.3456	37.8089	82.7325	33.9952	52.7604	65.0214	48.4041	85.4304
63	71.5614	46.1306	78.5669	28.3257	56.0803	57.3119	51.9166	76.2876
64	72.8821	41.609	79.6742	29.6141	57.1481	66.3632	52.1431	85.4299
65	71.4583	42.5908	78.423	34.6679	50.8336	64.0564	46.4748	87.6372
66	73.4676	46.563	83.207	35.0284	50.1881	59.2302	49.2426	85.5356
67	67.7853	37.2413	85.3689	34.5887	57.6124	59.8692	49.7487	79.1249
68	70.117	51.7869	81.8888	33.9468	59.8784	65.0214	43.464	72.6098
69	70.4472	49.5079	81.3155	34.7162	60.3517	56.4089	38.0403	76.3931
70	69.1885	52.6328	70.1289	35.1941	55.4859	70.5506	39.9364	77.5485
	HT
	1	2	3	4	5	6	7	8
-20	97.3508	102.118	94.8524	105.293	97.5509	97.1345	99.918	94.1397
-19	103.154	96.0211	97.842	98.2395	97.1698	94.1374	96.056	100.227
-18	101.466	102.186	93.5453	98.9385	98.2417	95.7718	103.696	99.8684
-17	103.197	97.7872	96.7994	95.2737	101.821	97.8375	93.9561	95.17
-16	102.777	102.976	103.666	98.2756	100.635	97.0809	98.1975	97.4487
-15	104.829	96.9298	103.985	92.6812	100.066	96.0896	93.1467	101.317
-14	100.152	89.2449	98.6918	98.9147	101.821	99.9186	101.512	98.4064
-13	108.59	99.5708	96.4976	95.6711	98.2151	97.8303	103.283	96.3862
-12	83.8719	106.05	101.096	97.1785	100.776	96.6342	98.0542	100.107
-11	97.6701	100.055	99.7154	98.8665	100.16	102.992	96.5113	98.8318
-10	96.0051	100.844	96.9181	101.483	101.63	102.099	99.1671	109.756
-9	96.4682	104.122	96.3331	103.569	98.5947	98.5566	99.8411	105.729
-8	103.923	104.852	104.57	104.992	100.588	106.14	103.635	95.6153
-7	90.7212	100.08	99.2403	96.7201	98.6412	101.13	100.86	98.5918
-6	101.828	103.349	102.421	107.404	103.482	98.3598	106.29	109.357
-5	97.7363	99.6383	103.619	93.5128	101.156	98.7837	103.397	98.7523
-4	96.8435	98.8232	100.356	97.2871	95.2715	102.931	105.876	99.5888
-3	104.256	97.8724	101.096	107.657	103.719	97.7241	100.312	101.981
-2	104.222	101.281	103.83	104.992	101.299	108.335	103.634	101.808
-1	104.939	96.1993	104.926	103.051	99.1635	110.514	92.6576	96.9182
0
1	108.071	107.459	109.936	104.956	98.6421	110.408	93.8638	98.1412
2	101.233	83.4284	58.9474	69.8786	100.682	104.528	85.356	86.5333
3	53.1147	29.5293	21.3787	23.8677	81.5882	102.159	66.1894	42.2966
4	39.9063	16.9658	24.4897	15.5607	34.4596	71.9196	57.1966	35.1548
5	25.1097	23.9331	19.7728	19.1226	15.5486	42.3437	57.7866	39.1551
6	19.8226	37.4939	22.7072	22.3624	13.5696	43.398	37.104	40.0325
7	24.7295	25.5267	25.6095	20.3426	16.7756	39.4726	45.2578	40.1388
8	19.8964	20.6131	23.3349	23.1263	20.1713	29.608	48.7484	44.7375
9	25.6777	18.3628	30.7881	23.715	21.1609	30.1561	51.4039	53.762
10	26.3341	18.4858	30.712	26.4382	24.6785	23.4841	57.0105	54.719
11	29.2623	24.0096	39.0061	30.3572	23.3569	24.2483	55.5354	55.7957
12	32.1358	29.9242	42.6352	31.1812	28.4538	21.7544	63.0302	47.2496
13	36.6635	24.0946	47.0323	31.7359	32.9273	23.8849	67.6354	57.0249
14	35.5385	24.3239	48.1844	42.5138	33.7207	24.6608	64.271	58.374
15	42.1123	34.3691	54.0258	45.2512	41.4341	26.6033	65.6874	53.1574
16	43.855	41.7822	61.2658	51.6342	47.4944	33.8943	78.7309	68.0631
17	47.6714	44.1428	64.7944	48.4207	54.8012	53.1908	84.3376	70.5619
18	50.5392	63.6904	68.2498	51.0817	61.3217	45.8967	87.6427	70.6816
19	58.0009	77.9689	72.4186	48.1675	64.0534	56.5556	87.1115	73.8715
20	61.2602	83.0337	63.3047	60.3224	65.0498	57.1424	93.3084	65.0525
21	51.5797	86.3838	72.8299	49.5621	55.8451	49.3214	89.2956	67.897
22	64.3487	101.625	70.206	48.8967	63.057	50.6271	85.341	62.4412
23	59.2917	94.3568	72.5463	54.5343	61.6336	54.8365	85.9901	70.0036
24	64.0393	101.774	73.9544	49.1922	60.0204	60.234	81.4457	62.0157
25	59.1372	93.5246	66.3119	52.8622	59.8306	59.6663	84.1606	66.4485
26	55.1885	98.7428	60.3746	47.2531	58.9085	57.7479	87.4656	63.6571
27	58.2768	92.0301	59.0538	43.5792	57.2207	52.8167	80.9735	64.2552
28	62.0323	89.3216	65.2149	53.3526	62.9337	53.4325	80.7379	69.4322
29	60.8688	93.7963	59.1632	46.2442	58.833	62.0302	84.6922	57.5035
30	54.1791	89.3643	56.7227	41.5472	58.3311	62.9576	79.7341	66.302
31	53.6882	98.6367	55.9639	45.9908	59.6864	80.4536	79.7936	71.9442
32	53.1147	95.6305	64.502	45.5206	58.6426	65.6568	76.6652	68.6612
33	57.036	102.848	65.5623	39.5919	56.6499	45.5625	76.4881	62.7201
34	62.4624	90.9309	62.8473	42.6387	55.1659	68.2667	81.1506	64.674
35	58.591	92.578	66.3575	44.6868	54.0889	64.9567	80.3248	69.9704
36	61.0177	88.6722	60.0409	43.4508	40.8109	70.304	77.7866	70.4489
37	57.7416	101.842	58.1167	38.4064	36.7712	68.0373	77.9636	65.4714
38	60.7363	93.4314	59.5884	43.5068	40.2075	76.0067	78.8493	59.4904
39	58.0725	94.0006	46.1413	44.4354	45.5488	70.3076	85.7541	66.7472
40	59.5837	97.3967	55.3744	38.7861	47.9689	76.4801	81.5641	69.2194
41	59.2362	101.575	56.2198	38.5369	51.48	75.1617	82.8625	59.6964
42	51.7303	100.216	53.9557	45.1246	53.8045	71.1564	83.0982	63.1988
43	54.405	101.906	45.2712	45.3718	48.9715	71.037	82.6678	73.2734
44	54.3389	87.9247	54.5286	53.0632	50.0902	78.694	76.7487	74.6822
45	59.534	93.754	55.877	38.7939	50.3412	66.9627	79.0584	64.315
46	57.6498	91.674	54.4983	49.0479	52.0493	67.4275	81.5709	60.7397
47	60.7014	102.615	57.0608	47.6611	52.3815	61.2038	79.2094	56.3804
48	56.6056	92.6505	60.2194	48.2517	52.8692	61.7775	75.5505	63.3581
49	56.9695	96.8453	53.5505	49.0055	55.0385	49.7059	78.004	62.8975
50	64.5968	85.9765	52.4168	46.1176	51.8519	77.4676	78.7793	66.5081
51	67.4701	90.3153	64.419	44.8696	56.3125	84.858	74.5812	65.684
52	62.0709	101.523	49.0621	44.3469	56.9838	88.5816	72.5576	66.6676
53	65.4737	96.4837	59.2273	43.3402	56.8745	68.4597	82.9195	64.7404
54	57.7197	98.3307	58.5739	50.6212	52.9497	77.6565	74.7493	66.8137
55	60.1996	95.4057	56.4636	43.9108	54.6858	80.5328	73.2402	64.1955
56	59.9751	103.391	56.503	44.7852	59.26	89.2852	71.0066	64.9463
57	60.2454	84.3843	42.4773	50.3079	55.1329	92.7217	71.7652	66.8602
58	59.1479	83.5644	38.0771	41.9031	57.7692	90.141	54.6498	64.8935
59	61.8558	98.9848	61.1335	41.0911	61.0623	91.3063	75.6349	62.3945
60	64.0398	95.4818	54.3913	46.3828	58.2631	91.7451	75.7285	62.7865
61	61.6297	100.772	43.7659	45.8924	57.0769	79.5546	77.9046	64.1557
62	62.0985	84.8466	53.5198	40.6472	55.9382	89.2214	79.7936	63.5309
63	55.4639	92.8542	46.9365	43.1391	56.5217	75.5906	81.5456	64.5676
64	54.1017	96.2293	58.1636	42.2349	55.4638	80.7974	82.6416	61.5371
65	58.4145	92.0471	52.106	45.3176	55.9724	88.2788	85.4754	55.9948
66	56.1148	104.313	59.8942	44.5982	56.5076	89.7473	81.7572	44.0331
67	60.3281	97.5665	52.4107	42.5946	53.9258	92.1241	83.7475	62.5607
68	57.6535	98.1738	57.1231	57.5487	51.6075	85.3887	78.4855	59.2225
69	55.7251	93.6735	56.8183	56.5117	51.2417	80.9906	84.1597	59.3708
70	58.5028	102.135	55.3206	55.1555	52.2849	74.6191	82.5081	56.0349
D
	Long term potentiation (LTP), fEPSP slope (% of baseline)										fEPSP slope last 5 min (% of baseline)
	WT										WT	HT
	1	2	3	4	5	6	7	8	9	1	125.051	119.5
-20	100.328	102.517	91.4447	101.909	93.8197	93.7863	101.666	94.3808	101.663	2	123.614	131.486
-19	95.4412	101.945	102.451	97.778	94.5661	96.2211	101.899	95.6055	99.1022	3	183.571	151.851
-18	99.7523	98.8937	103.715	100.118	88.8985	92.8787	103.607	93.9814	95.4934	4	121.716	132.133
-17	98.2548	98.8938	99.3858	94.5224	93.6712	100.308	98.1235	94.1145	95.5982	5	121.176	135.02
-16	102.286	98.5123	103.832	100.031	88.1531	101.155	97.9871	97.9484	95.9426	6	144.228	124.864
-15	98.7155	98.7984	106.523	100.686	82.9318	96.1182	98.4147	100.052	98.0241	7	127.373	127.916
-14	94.684	99.2752	98.3559	98.0408	100.83	95.0613	97.1333	95.7386	101.364	8	123.686	137.459
-13	97.2181	99.4659	100.673	101.605	100.979	100.273	97.2984	100.371	103.46	9	122.272	116.529
-12	98.8307	98.3215	99.9709	96.1827	104.112	99.2774	100.599	99.8385	96.6315	10		122.981
-11	96.0014	100.801	92.2366	95.6369	100.829	98.3848	101.278	100.398	104.029
-10	103.093	103.471	101.644	105.103	95.6098	92.2225	98.6573	104.418	102.621
-9	104.014	99.5614	86.9902	98.2376	107.392	98.7283	97.8809	99.2529	100.585
-8	99.1764	99.3705	100.579	98.4343	109.183	117.476	98.0265	104.125	98.7577
-7	105.051	96.5096	104.043	100.206	100.681	105.264	104.723	101.496	100.675
-6	101.365	98.0355	100.38	101.911	107.201	99.1287	100.356	102.581	100.3
-5	103.208	101.183	101.047	101.736	106.049	97.4119	99.9675	99.7053	99.8061
-4	100.559	96.4143	107.506	98.6096	107.243	106.385	98.5603	102.993	100.854
-3	99.0121	103.185	98.6247	118.023	98.1454	103.513	99.2882	104.072	103.714
-2	101.71	102.804	98.3793	96.4461	107.392	105.676	102.054	104.085	101.708
-1	101.299	102.041	102.217	94.7838	112.314	100.731	102.481	104.844	99.6713
0
1	178.214	174.846	176.784	174.223	182.519	199.879	191.218	158.612	212.366
2	160.145	169.083	164.51	163.818	159.383	171.796	173.097	157.606	184.913
3	157.545	150.351	150.879	151.708	134.4	158.873	160.335	154.045	159.493
4	157.495	146.863	148.671	147.991	133.185	147.659	159.568	139.942	156.948
5	145.5	145.623	158.192	143.27	133.494	149.166	158.442	140.807	151.919
6	149.037	140.882	155.477	144.45	130.724	147.742	158.782	137.466	149.639
7	149.152	135.624	151.358	141.694	130.884	152.161	146.116	140.66	145.654
8	140.3	138.375	142.863	137.957	144.234	155.797	145.34	135.921	146.091
9	139.774	134.274	148.597	135.268	132.078	151.348	143.835	139.049	143.021
10	140.613	131.032	148.913	137.279	132.024	147.109	145.097	131.788	144.469
11	143.459	135.991	159.397	134.875	127.912	143.751	144.903	132.54	141.062
12	137.108	131.604	150.785	130.218	127.165	152.355	141.069	133.585	145.667
13	137.881	133.703	146.83	129.541	128.839	146.655	141.661	133.685	142.148
14	136.68	131.795	153.137	134.35	125.45	146.724	142.166	127.528	141.262
15	140.234	129.697	142.863	134.744	130.97	142.012	143.156	129.492	141.758
16	140.596	124.657	153.441	130.983	133.101	144.171	138.06	134.496	145.704
17	145.597	125.978	143.566	159.794	130.085	144.915	146	126.563	138.928
18	134.935	132.558	153.09	126.699	121.456	150.673	142.768	127.402	137.031
19	141.368	129.887	144.818	129.759	130.16	137.322	140.875	125.851	136.719
20	137.255	128.266	149.58	128.885	126.485	142.58	143.253	126.603	137.393
21	136.696	127.789	142.454	129.759	119.697	146.46	141.749	125.937	138.105
22	133.026	128.552	149.72	131.421	123.618	146.792	141.535	126.703	136.732
23	133.652	120.202	164.276	122.72	128.775	150.295	140.487	127.701	136.532
24	138.061	118.854	154.869	123.026	124.62	146.27	141.069	131.734	135.958
25	142.487	120.925	144.701	125.627	128.914	143.656	145.068	130.464	138.055
26	146.749	120.951	179.346	125.3	125.856	146.941	141.943	128.293	134.311
27	134.573	122.941	157.583	119.988	128.062	139.707	136.944	127.096	135.521
28	137.93	119.97	155.618	121.955	121.669	142.347	133.742	126.929	135.097
29	132.155	117.573	162.732	123.944	121.84	145.888	133.79	124.766	133.038
30	133.125	126.742	152.669	126.545	131.79	146.35	135.246	126.896	129.349
31	133.816	122.832	159.83	123.507	124.312	144.721	135.537	122.616	133.774
32	138.209	127.982	163.69	121.496	119.069	141.52	134.761	127.408	132.938
33	126.444	128.268	164.089	126.698	122.947	142.721	132.917	128.12	133.612
34	128.32	125.407	161.421	127.77	125.292	142.168	136.061	123.368	135.908
35	129.142	124.74	161.327	118.961	128.317	144.427	139.109	125.511	134.473
36	129.077	129.89	161.187	131.442	131.417	139.459	127.19	120.174	136.881
37	127.3	127.315	166.007	124.097	121.53	139.288	128.161	127.821	135.534
38	134.079	126.647	171.951	122.873	122.52	140.127	136.653	124.633	131.64
39	141.104	130.557	171.53	122.72	121.733	141.764	135.586	124.646	127.447
40	130.738	131.892	157.068	126.459	121.721	139.078	132.616	124.367	130.904
41	129.718	123.309	168.347	121.802	123.022	142.092	138.701	128.047	130.567
42	134.539	124.263	168.301	124.25	119.41	142.512	134.149	125.232	132.049
43	137.418	128.554	170.781	124.709	127.412	137.475	127.676	124.127	130.08
44	127.217	125.598	169.565	127.923	117.578	138.982	128.743	125.106	124.278
45	132.762	126.266	168.768	117.081	119.165	138.143	137.362	123.934	125.485
46	132.465	129.031	164.93	122.873	120.336	141.729	135.197	124.886	118.335
47	134.884	124.263	174.198	125.015	133.846	140.581	132.402	124.806	122.67
48	135.46	124.93	177.333	121.955	117.951	139.478	133.024	125.784	122.815
49	128.451	124.93	163.175	126.24	121.296	142.34	137.643	124.945	126.998
50	123.317	123.404	166.732	123.179	125.845	142.767	142.05	126.749	129.097
51	121.507	123.405	178.129	124.754	123.692	135.338	131.412	123.415	130.582
52	129.751	123.881	176.07	128.12	126.868	143.675	132.771	124.28	126
53	131.083	126.742	174.478	118.48	125.909	147.777	132.5	124.466	121.851
54	129.125	117.11	162.871	124.885	116.501	146.918	128.618	124.406	127.023
55	130.046	119.685	169.892	113.868	122.02	150.466	129.442	123.395	122.538
56	120.025	120.353	183.113	120.098	120.54	148.921	128.792	129.524	123.991
57	124.287	123.023	184.773	123.224	118.675	141.691	125.968	120.373	120.978
58	120.043	121.306	183.206	123.704	125.227	142.607	127.375	125.837	123.661
59	133.041	127.029	182.48	123.727	121.207	145.297	127.734	121.039	122.832
60	127.858	126.361	184.282	117.825	120.23	142.626	126.996	121.658	119.899
	HT
	1	2	3	4	5	6	7	8	9	10
-20	100.133	99.2122	100.579	100.342	97.4608	100.165	96.7884	96.2338	99.8957	100.761
-19	99.8023	96.991	97.3667	100.454	97.3248	95.6662	101.307	102.115	100.249	99.5096
-18	103.547	97.3663	96.4596	93.5303	95.6106	101.65	95.748	99.1647	100.304	99.2876
-17	101.386	99.6496	102.166	97.6021	97.4063	95.1715	97.9476	98.051	99.1881	102.234
-16	100.133	99.806	102.205	98.3901	96.9982	101.209	98.4252	98.8884	103.596	100.727
-15	97.1452	102.277	101.184	93.7745	96.3792	96.3685	102.961	103.285	103.366	97.6331
-14	98.591	94.6614	99.6907	99.0097	97.876	94.5504	99.4741	98.9933	105.339	100.821
-13	97.7096	96.4905	97.4045	92.9492	99.8551	102.613	98.2636	97.6231	98.9976	97.0614
-12	102.542	99.0241	98.1604	98.9905	99.6102	100.076	98.9025	99.2501	98.4946	98.3259
-11	98.4946	98.7113	95.4012	100.436	100.018	105.384	97.4023	98.4887	94.2079	99.8931
-10	99.94	96.5532	103.527	105.652	102.875	99.6253	104.342	101.239	102.195	99.9468
-9	96.8562	98.5862	98.1983	99.7411	99.7463	99.9585	106.858	100.811	99.6911	100.915
-8	100.615	100.995	100.164	99.1404	102.522	101.812	100.275	101.353	94.1114	97.0144
-7	102.253	100.494	101.335	97.1336	101.433	97.9011	98.6812	99.6312	97.6504	102.718
-6	98.2054	103.809	99.8991	101.205	105.324	94.9556	107.429	99.8971	104.073	99.624
-5	99.3756	107.017	101.562	102.48	98.3859	100.984	102.714	102.219	99.3781	100.566
-4	101.289	99.2117	102.771	100.716	104.807	101.488	99.6529	101.725	100.399	102.234
-3	100.615	103.528	102.053	113.437	101.025	105.663	97.7431	100.544	102.971	97.8756
-2	101.041	103.559	96.6107	99.5531	100.971	101.416	99.039	98.7171	100.644	104.171
-1	100.326	102.058	103.263	105.464	104.372	103.342	96.0463	101.772	95.2481	98.6827
0
1	178.912	202.521	177.498	197.286	170.68	200.258	195.887	194.312	147.127	186.591
2	174.574	181.815	170.392	172.707	154.627	173.507	179.781	165.289	137.602	166.574
3	161.908	169.367	156.255	154.789	149.321	161.288	154.962	149.112	133.792	154.83
4	156.539	167.834	156.407	142.703	141.458	154.224	150.06	145.401	132.921	150.526
5	155.851	163.487	143.782	138.935	139.444	150.085	149.36	147.2	133.629	146.195
6	150.825	161.704	150.17	140.655	141.648	154.917	152.157	146.705	127.928	144.614
7	143.597	159.796	154.196	139.404	138.464	145.316	144.39	142.071	127.043	143.746
8	147.796	154.792	153.609	130.961	140.451	139.873	144.774	139.929	123.56	138.467
9	144.34	147.754	149.792	131.008	133.179	136.903	139.274	137.693	115.953	133.88
10	144.396	153.447	150.51	136.787	136.07	138.298	142.216	136.361	117.545	137.182
11	141.615	147.942	141.099	143.156	134.166	137.398	141.388	133.506	120.021	133.006
12	139.867	148.943	144.634	137.2	134.22	138.073	139.914	131.984	119.314	132.608
13	141.78	145.19	143.933	131.868	135.717	140.26	138.635	133.459	122.88	125.889
14	140.871	144.439	142.12	137.153	134.506	129.165	142.301	132.793	118.66	130.322
15	137.498	143.813	144.236	134.557	130.268	132.081	137.484	130.471	121.762	132.984
16	134.648	142.906	145.258	132.087	135.172	133.214	131.26	129.272	118.184	131.377
17	129.94	142.406	145.788	141.29	135.526	134.277	140.109	129.985	119.055	124.094
18	128.095	143.563	145.126	138.138	130.438	127.96	132.752	131.413	120.457	123.381
19	131.592	139.028	145.126	138.138	136.016	128.22	137.714	132.288	115.857	122.345
20	131.371	142.906	143.803	134.526	131.867	125.296	124.78	137.065	118.933	126.986
21	128.59	137.284	143.274	140.464	136.424	127.321	135.94	134.125	116.102	124.531
22	127.709	138.277	144.766	133.776	143.199	129.966	135.821	127.987	115.435	131.492
23	126.112	143.046	145.258	135.464	135.227	129.795	132.027	136.39	118.565	126.575
24	131.206	140.372	147.64	135.511	135.009	131.847	136.298	134.839	122.023	123.993
25	128.205	139.403	148.037	139.048	132.479	134.339	132.462	132.65	120.743	129.837
26	127.296	144.578	144.729	139.226	135.608	132.333	134.729	135.933	117.722	120.388
27	124.13	135.212	146.846	140.718	136.641	130.776	137.168	133.506	115.641	123.71
28	123.454	133.085	142.083	140.905	136.832	128.355	132.027	132.555	118.089	125.479
29	124.047	137.932	137.056	143.298	137.131	127.006	135.667	138.283	111.054	125.936
30	121.706	142.593	145.523	137.309	136.669	134.141	129.384	132.222	114.905	128.236
31	122.918	136.478	147.507	138.654	135.581	133.214	130.961	133.697	113.816	121.719
32	125.204	139.074	144.994	132.352	137.023	128.131	127.451	136.742	116.346	123.871
33	121.238	136.134	142.613	130.914	137.24	130.425	130.094	132.888	116.782	125.748
34	120.88	137.103	140.363	133.166	135.58	129.345	124.368	130.319	108.972	129.326
35	120.605	135.477	146.581	132.071	135.2	132.486	124.524	128.653	113.081	126.663
36	118.925	133.945	148.301	135.073	137.213	131.73	128.633	127.178	111.502	122.217
37	116.557	136.179	149.889	141.374	132.594	128.67	130.45	132.269	111.856	126.817
38	119.806	139.573	153.385	131.758	130.2	126.736	132.129	132.126	115.911	127.294
39	122.202	135.789	155.18	136.825	129.268	129.705	126.783	131.555	109.298	127.12
40	122.697	139.198	156.239	134.213	132.227	130.29	130.322	135.809	109.053	118.276
41	122.008	139.245	149.624	139.592	131.962	126.691	136.042	135.6	113.652	124.53
42	117.411	139.089	150.947	131.68	133.132	128.355	135.164	136.647	115.082	126.043
43	116.171	136.634	152.667	131.242	138.111	128.086	132.802	135.267	114.905	123.381
44	117.356	137.291	150.077	138.059	136.288	123.035	131.327	135.838	111.91	121.323
45	114.437	133.428	155.577	137.699	134.166	116.937	130.091	138.369	111.802	128.169
46	120.824	140.996	157.562	132.603	139.771	121.562	127.124	134.41	116.293	123.225
47	115.869	136.024	157.431	133.588	135.145	127.06	132.467	137.646	117.871	136.98
48	118.36	140.043	154.916	138.716	137.839	120.086	126.314	141.528	117.054	124.234
49	118.581	138.057	150.947	133.807	139.825	124.441	129.264	142.613	113.626	128.787
50	120.962	133.46	154.122	135.823	137.349	123.137	130.867	143.374	115.34	120.852
51	119.118	133.053	147.866	135.167	141.594	121.337	134.064	139.425	114.496	125.855
52	117.919	131.349	144.975	129.131	137.179	129.094	130.696	142.356	115.884	122.244
53	120.232	133.46	143.671	128.381	138.683	120.707	126.087	139.149	114.945	124.644
54	121.622	130.66	148.566	132.978	133.866	122.777	128.502	137.313	119.558	124.227
55	118.498	138.369	148.83	128.928	136.941	122.012	127.422	142.537	114.891	120.825
56	122.477	138.697	153.725	136.23	132.887	124.54	129.469	134.505	115.884	121.033
57	119.269	129.613	150.04	126.189	137.784	126.862	128.275	137.541	117.286	125.963
58	117.478	128.096	151.742	132.368	134.812	125.971	129.295	137.817	115.829	119.924
59	120.797	131.019	152.27	132.29	136.179	121.652	125.035	138.217	116.51	123.77
60	117.479	130.003	151.476	133.588	133.438	125.296	127.507	139.216	117.136	124.214
E
	TBS Long term potentiation (LTP), fEPSP slope (% of baseline)												fEPSP slope last 5 min (% of baseline)
	WT												WT	HT
	1	2	3	4	5	6	7	8	9	10	11	1	181.957	146.256
-20	99.845	95.9015	97.5311	104.022	93.906	102.682	102.284	99.858	97.4722	98.0071	105.711	2	186.058	144.395
-19	99.6952	95.4561	95.4034	99.5791	84.8937	97.4599	102.547	101.465	99.0363	104.113	103.57	3	175.492	164.305
-18	100.537	95.8789	94.5257	98.6164	90.102	105.478	95.8415	101.322	96.2133	105.438	103.959	4	152.251	164.22
-17	100.116	97.753	95.2438	97.7519	93.5502	98.2232	89.9382	99.9295	96.4139	101.379	101.185	5	183.52	162.52
-16	96.8065	99.6458	99.6589	99.2598	94.4923	103.378	99.2152	102.393	103.271	99.4881	105.468	6	130.65	159.777
-15	96.0998	99.8584	102.718	95.9993	100.714	103.351	103.514	104.267	98.2737	101.182	102.207	7	128.778	129.108
-14	101.122	99.9065	99.4727	97.9998	103.736	107.005	96.4222	103.107	104.091	100.605	97.8148	8	149.635	129.812
-13	102.281	97.7257	98.1428	103.676	98.545	103.282	96.5742	100.429	92.4945	97.1311	102.134	9	169.791	136.359
-12	95.227	99.2481	103.914	98.3691	98.5985	101.087	100.348	98.8584	98.6078	99.5373	98.0215	10	162.995
-11	105.243	101.257	105.67	98.2466	115.094	105.764	103.099	102.357	95.222	95.7023	98.7028	11	132.324
-10	97.5892	98.7269	98.3556	102.541	101.105	93.2594	101.123	98.1087	106.371	101.358	92.9235
-9	100.385	99.4674	101.069	102.639	96.3764	102.328	94.141	97.8588	101.707	99.9816	94.0756
-8	96.896	101.479	99.1532	97.6038	102.349	95.2639	96.546	99.8938	97.7305	99.3969	103.278
-7	101.934	104.055	98.4354	94.0492	103.718	97.0776	102.864	98.0729	99.9906	98.6173	95.6003
-6	99.1673	101.683	98.9939	104.886	109.281	103.091	97.1407	98.6085	102.814	98.4923	98.119
-5	100.521	102.889	97.9301	98.838	107.504	104.237	97.0304	99.3225	102.013	96.552	108.484
-4	103.077	100.427	101.388	99.0366	104.722	88.6776	112.348	97.5731	101.707	97.5081	92.3352
-3	103.829	102.965	105.111	103.257	101.22	101.087	104.509	99.7601	103.043	101.619	101.952
-2	100.19	102.54	103.861	98.7893	100.98	94.5003	102.284	96.7076	99.9143	100.376	95.1988
-1	99.4379	103.136	103.423	104.839	99.1136	92.769	102.229	100.108	103.615	103.515	99.2627
0
1	127.455	115.727	159.535	132.956	198.148	142.53	130.413	127.804	199.561	133.053	126.86
2	136.434	136.567	178.905	140.853	188.46	158.741	144.363	139.398	184.215	152.233	128.164
3	135.592	140.979	191.34	149.443	176.032	156.832	145.759	149.502	175.222	156.274	129.157
4	138.75	142.327	187.516	156.997	173.307	166.951	145.939	156.874	175.718	162.405	138.141
5	144.586	152.51	196.325	168.127	176.305	162.751	151.317	162.586	175.756	166.732	137.48
6	158.047	158.305	193.172	168.473	171.575	171.055	147.183	166.299	177.549	166.523	145.109
7	166.544	160.774	196.098	168.991	171.559	166.664	149.465	176.634	177.015	173.058	144.914
8	176.44	168.238	198.852	172.102	188.149	165.71	156.294	178.616	182.51	171.772	151.038
9	174.079	173.381	195.114	170.201	176.258	163.8	165.763	180.508	182.318	179.515	151.951
10	175.883	178.33	193.997	170.028	184.896	165.614	160.054	178.652	182.966	181.944	152.154
11	175.914	181.827	184.927	170.201	175.484	161.223	152.119	179.901	183.893	182.022	148.605
12	176.651	179.256	193.598	168.3	177.929	161.129	156.474	181.794	178.999	182.269	150.815
13	180.441	183.302	196.151	166.745	181.617	158.551	150.958	178.188	176.979	181.606	150.47
14	175.688	184.433	198.172	166.745	189.767	149.959	158.284	176.653	178.923	178.021	152.194
15	182.757	185.805	191.098	169.164	176.945	145.187	156.667	171.44	181.556	176.981	146.054
16	160.934	186.045	187.108	166.399	171.042	147.86	155.893	175.903	186.249	180.788	145.381
17	179.599	190.091	186.124	170.374	186.212	149.96	151.483	174.225	177.93	175.981	143.373
18	178.636	192.353	190.911	165.19	180.524	147.86	151.538	171.69	171.255	179.827	140.668
19	173.417	186.792	194.37	164.499	182.666	139.706	153.184	168.548	179.515	174.903	135.067
20	174.861	188.39	189.448	162.598	183.901	149.388	162.087	169.905	171.904	173.032	142.42
21	177.177	190.886	187.109	161.734	183.955	137.783	145.732	171.797	179.667	172.799	138.851
22	171.177	188.444	188.358	166.745	181.368	132.522	155.617	163.229	174.268	162.08	129.912
23	171.732	189.487	184.076	160.179	188.949	139.364	154.179	164.8	180.143	164.939	134.138
24	180.02	190.577	185.778	163.289	174.4	132.943	139.967	164.719	171.122	165.562	138.109
25	173.387	189.624	184.369	158.278	184.985	131.471	150.405	171.155	173.963	167.316	136.904
26	178.726	188.115	183.97	156.008	184.567	132.985	154.732	160.837	176.099	168.031	140.209
27	173.703	189.294	184.953	158.451	184.398	135.317	149.714	160.837	172.476	171.292	142.643
28	177.508	194.012	186.79	158.278	189.544	135.355	148.068	171.405	175.175	171.941	138.709
29	180.862	192.97	183.704	157.76	183.474	132.37	139.511	166.585	175.204	164.082	140.92
30	180.967	192.284	182.294	156.304	195.126	133.421	141.142	166.192	168.24	164.861	146.111
31	182.441	190.584	180.831	158.451	193.108	133.516	150.751	164.389	182.663	164.588	147.612
32	175.493	194.314	183.783	160.352	187.118	129.915	142.152	159.016	175.3	163.575	155.561
33	179.599	189.953	178.464	164.499	179.404	132.875	141.087	155.178	181.364	162.912	145.3
34	179.283	189.349	187.376	158.97	182.443	139.054	141.156	154.696	174.899	168.537	143.393
35	177.809	191.297	185.061	158.797	179.039	127.34	144.322	153.446	176.291	158.625	135.403
36	182.862	189.267	185.193	154.995	179.35	127.352	151.788	158.73	175.9	164.793	146.273
37	182.546	189.569	184.289	150.133	180.15	129.41	141.363	158.775	181.365	164.198	141.812
38	179.598	188.033	187.388	155.416	176.847	138.698	147.516	150.715	175.222	162.523	147.895
39	173.523	186.99	187.122	152.058	181.661	145.012	138.571	156.767	180.869	162.457	145.036
40	173.598	183.178	183.678	159.661	177.75	139.406	150.668	156.874	182.795	169.343	146.212
41	178.23	184.988	170.751	155.565	181.75	136.747	147.322	150.947	180.439	165.588	148.403
42	182.862	184.138	171.07	159.315	183.083	137.048	154.442	158.266	179.581	167.888	143.9
43	179.704	179.776	178.145	155.514	179.794	135.643	142.76	152.322	173.725	166.147	143.758
44	182.215	181.203	183.359	162.252	184.771	142.517	140.507	151.045	184.341	168.2	143.556
45	173.372	181.861	182.029	154.822	187.215	130.965	143.935	155.196	181.232	163.081	148.545
46	175.598	183.178	169.794	152.552	179.883	126.056	150.571	156.981	181.614	158.911	141.406
47	182.968	182.245	176.018	160.524	186.141	142.325	139.332	154.518	175.719	161.353	141.852
48	178.862	185.454	185.593	155.514	183.127	133.668	139.539	151.661	176.968	165.212	140.209
49	178.441	182.656	177.852	153.613	178.788	138.123	138.461	149.725	175.071	159.924	141.142
50	171.177	187.018	171.177	153.786	185.509	131.061	140.203	156.749	177.856	163.926	140.611
51	172.966	186.689	176.895	160.006	180.816	133.557	130.332	147.761	173.43	160.301	143.718
52	174.845	190.584	170.618	152.799	190.584	133.967	135.198	148.055	186.497	165.588	139.926
53	179.733	189.514	177.215	151.539	182.674	134.184	136.636	152.956	176.139	160.379	132.772
54	179.915	189.87	174.023	148.505	186.194	142.04	128.342	150.171	173.239	162.782	132.074
55	180.125	188.06	180.102	148.751	183.047	133.503	130.152	153.286	174.24	163.523	129.928
56	176.546	185.07	172.746	150.306	183.216	137.513	135.765	152.161	170.951	163.432	141.65
57	181.388	188.06	176.058	151.417	177.964	134.212	138.281	149.903	171.027	164.172	126.594
58	184.02	186.085	181.658	155.836	191.073	120.493	125.562	146.574	166.563	163.549	128.127
59	181.073	187.265	175.568	152.429	185.82	129.508	120.405	148.984	171.141	163.692	134.004
60	186.757	183.809	171.43	151.269	179.528	131.526	123.876	150.554	169.272	160.132	131.246
	HT
	1	2	3	4	5	6	7	8	9
-20	100.539	102.6	102.071	99.7759	101.648	103.624	97.5033	97.7756	99.5188
-19	99.0268	100.451	99.2058	95.7562	97.3178	102.31	99.3685	103.182	104.525
-18	97.4205	97.9803	100.951	99.5559	103.176	98.7152	97.5727	101.306	100.894
-17	95.5307	94.4344	103.073	88.4167	100.041	107.953	98.4954	102.186	101.246
-16	98.1764	98.41	101.347	97.6227	101.471	102.619	105.281	101.653	100.048
-15	98.6484	96.691	99.8924	98.0531	101.707	95.2753	99.6463	90.6622	101.387
-14	97.9874	94.5423	105.611	94.2983	99.3356	107.779	99.6066	97.7667	101.352
-13	102.24	95.939	91.8902	105.067	96.2299	93.6905	99.8837	96.433	98.2141
-12	100.822	99.377	103.753	103.739	100.326	99.4499	101.134	97.2066	101.211
-11	100.539	103.137	95.2054	102.152	101.177	89.4389	99.1308	102.115	99.9066
-10	104.318	99.3769	98.0945	103.264	100.962	111.181	102.921	98.5226	98.7432
-9	100.917	98.6249	98.7025	102.765	93.7115	102.6	100.619	99.0561	99.0958
-8	103.845	98.5174	108.774	106.381	94.574	93.6131	101.948	98.8783	101.775
-7	101.956	104.426	97.9985	100.429	101.805	102.349	93.3372	99.0738	98.0382
-6	100.539	102.707	95.4793	94.1048	97.0428	91.7577	100.837	106.383	96.1697
-5	93.7349	104.104	91.4799	104.105	99.6691	93.6801	101.85	98.6294	98.7433
-4	95.9086	98.1951	107.109	98.6056	98.3366	99.9713	100.281	99.3051	100.435
-3	100.066	102.922	103.201	96.7679	101.883	102.426	99.3289	106.632	99.131
-2	103.657	104.856	98.3719	105.196	103.059	100.745	98.2776	103.467	98.9195
-1	104.129	102.707	97.7901	103.947	106.527	100.822	102.979	99.7675	100.647
0
1	167.719	140.193	157.144	175.877	152.022	191.778	157.505	145.543	99.521
2	155.811	156.193	181.968	174.046	152.17	190.28	153.418	138.004	120.177
3	162.142	155.593	184.1	185.926	157.774	172.268	170.305	143.268	134.49
4	156.851	164.74	179.291	185.425	166.319	185.314	164.669	138.928	138.315
5	160.063	160.366	180.861	183.852	172.952	191.46	162.368	142.272	151.888
6	155.244	167.272	188.067	209.991	178.527	182.357	157.864	146.184	161.142
7	161.953	163.696	185.141	203.185	180.487	182.279	164.035	147.074	161.335
8	159.591	159.629	190.595	209.926	183.622	186.647	156.098	148.496	161.44
9	159.024	159.307	185.141	201.606	189.462	193.759	172.925	152.551	157.12
10	154.299	158.908	175.952	194.204	188.56	190.357	163.857	149.314	162.867
11	152.504	158.601	173.242	203.156	185.425	188.154	160.047	148.745	170.359
12	154.488	157.771	176.382	189.955	188.756	183.903	166.953	147.714	160.716
13	152.504	154.072	172.564	194.85	189.619	180.037	177.509	145.971	162.549
14	149.292	151.018	168.102	203.875	190.952	180.192	162.845	146.22	169.725
15	147.118	152.677	173.969	196.365	187.032	173.833	155.702	140.387	163.925
16	145.984	150.129	173.638	195.404	179.507	181.882	164.453	135.941	161.581
17	149.764	148.917	167.771	197.6	175.94	174.24	161.675	137.684	157.684
18	145.795	147.735	172.928	182.137	176.097	174.702	157.169	137.897	160.03
19	149.386	146.692	169.771	193.825	169.512	183.671	161.375	135.905	152.89
20	153.827	144.85	173.655	186.589	165.25	167.523	158.241	133.451	153.278
21	152.693	141.873	161.557	191.843	169.062	172.501	156.415	132.526	153.595
22	146.457	141.719	167.027	188.139	166.377	185.604	156.513	132.882	155.976
23	150.331	142.886	159.788	184.492	164.457	164.268	153.34	131.601	149.189
24	147.307	146.815	168.168	182.798	171.884	162.972	154.57	135.443	155.834
25	147.78	145.679	167.854	182.798	170.796	169.95	152.248	133.415	154.83
26	140.882	141.535	164.151	192.676	169.768	161.484	152.665	134.02	148.202
27	146.362	151.589	161.292	184.291	174.608	165.822	157.704	129.325	146.227
28	141.732	146.692	160.3	185.741	168.219	163.648	150.997	133.984	154.407
29	144.567	151.573	162.549	180.759	173.393	156.14	151.95	132.668	146.086
30	149.481	143.268	161.375	190.12	172.648	157.136	147.843	133.273	142.173
31	147.874	138.204	165.573	184.636	168.073	163.686	147.624	132.597	149.031
32	143.055	143.285	161.689	178.922	161.88	171.997	147.346	132.882	147.109
33	146.74	141.443	154.681	186.675	158.921	159.59	144.211	130.392	150.865
34	149.575	147.307	164.466	183.185	158.646	171.022	147.248	128.4	151.482
35	142.299	136.316	169.771	176.15	155.687	167.262	154.251	133.202	149.613
36	143.15	145.787	167.672	186.186	158.617	163.223	147.624	131.53	144.888
37	147.307	140.031	164.945	193.221	160.812	160.749	154.846	131.281	145.699
38	142.677	143.039	173.592	179.898	160.381	162.798	150.283	136.474	152.169
39	141.071	141.412	159.094	182.776	162.301	158.14	150.164	132.526	151.888
40	143.055	144.666	168.3	182.274	158.813	161.609	131.83	131.317	138.895
41	146.362	144.881	163.772	192.963	161.086	156.14	142.426	128.507	143.761
42	145.134	143.76	168.565	186.158	163.241	162.334	138.854	129.041	148.767
43	141.827	143.346	160.351	178.878	164.496	169.814	146.989	130.748	151.641
44	136.347	139.677	174.382	178.606	161.791	168.75	136.304	130.392	142.967
45	139.465	143.499	172.515	179.553	166.455	173.581	131.116	130.57	150.654
46	140.032	143.361	171.275	171.03	158.421	154.42	131.404	127.902	135.123
47	137.292	145.141	174.548	176.502	162.026	159.174	139.707	130.463	143.338
48	139.37	145.096	175.143	162.344	160.576	152.787	127.763	131.352	142.739
49	136.063	146.462	169.523	156.781	163.526	156.13	133.298	132.597	137.292
50	136.158	141.594	169.804	166.724	165.867	167.049	142.505	128.258	139.09
51	140.976	144.112	165.745	173.845	162.595	158.681	132.445	125.484	144.361
52	133.89	139.983	170.449	175.849	162.34	154.951	125.947	130.001	145.102
53	143.623	140.412	165.527	161.814	161.674	153.976	139.568	125.084	143.991
54	150.054	144.727	169.672	174.873	166.142	158.672	125.292	127.84	144.978
55	153.172	146.537	176.415	165.504	161.478	157.348	128.209	127.76	146.089
56	144.007	143.299	164.697	158.117	162.026	158.923	136.126	132.668	142.757
57	145.235	142.346	172.151	167.923	164.065	159.271	124.439	130.642	135.494
58	147.881	140.797	164.036	163.027	162.497	163.107	132.038	127.227	137.698
59	150.906	149.761	161.18	168.239	164.065	153.821	128.378	130.197	130.242
60	143.251	145.771	159.458	163.795	159.949	163.764	124.558	128.329	135.601
F
	PSD density			PSD length (µm)			PSD thickness (µm)			Perforated PSD (%)
	WT	HT		WT	HT		WT	HT		WT	HT
1	539.07	530.94	1	0.172	0.171	1	0.01	0.011	1	2.63	3.46
2	524.83	524.83	2	0.17	0.173	2	0.011	0.011	2	1.56	3.1
3	528.9	535.01	3	0.173	0.173	3	0.011	0.01	3	4.3	4.33

## Sheet: Fig3
A
	Distance moved in open field (m)
	WT
	1	2	3	4	5	6	7	8	9	10	11	12	13	14	15	16	17	18	19	20	21	22	23	24	25	26	27	28
10	48.0362	52.3316	82.6608	66.9398	55.6756	58.9986	77.9156	77.0873	65.8606	58.4616	62.6989	66.6152	67.439	71.7885	94.5745	86.2904	55.256	71.9964	70.1951	64.741	60.6499	70.5741	67.4717	58.6178	66.4806	66.1723	81.1122	65.6883
20	31.8728	37.0522	65.6863	43.1853	45.6488	47.4851	59.6987	55.4943	48.7961	47.0612	46.2465	53.1324	53.5872	61.5701	79.455	81.4822	42.7803	53.6871	49.202	46.1224	51.2537	60.3367	55.3444	47.0464	61.4563	56.5474	56.6053	56.1898
30	32.3264	36.5876	78.7994	43.5964	41.5605	41.4803	60.1027	48.6859	40.3444	43.1877	41.2389	56.3518	56.9795	58.0543	70.5808	66.5748	39.039	64.5345	42.0889	39.2172	40.2316	54.493	46.2551	52.8081	52.3057	52.6252	49.7549	43.0815
40	31.2601	34.9171	74.8074	39.9572	39.5644	40.4301	57.3377	41.9886	40.1306	41.1727	38.1995	51.1595	46.015	51.2248	62.4725	50.8106	39.6956	56.4906	43.2639	34.9733	29.1632	56.5334	43.4101	38.7909	52.7627	47.0869	50.3307	49.4238
50	27.5662	28.018	64.4212	33.8033	42.5643	33.0544	60.5407	34.7822	36.7649	36.4407	43.5886	43.6934	40.2166	60.2159	82.9274	55.4638	37.9839	52.76	45.6867	39.3608	36.1158	54.0937	37.3562	45.2814	45.4563	52.4043	48.4777	40.0339
60	34.8717	29.2945	43.941	35.3661	40.2437	35.8927	53.9653	40.2708	39.3208	37.735	33.7917	40.2349	39.0163	58.6471	42.2223	83.2216	38.9546	52.1348	41.687	34.6834	27.6823	50.4325	41.9074	41.4163	32.2115	46.0978	40.8181	45.451
	HT
	1	2	3	4	5	6	7	8	9	10	11	12	13	14	15	16	17	18	19	20	21	22	23	24	25	26	27	28
10	58.933	41.5065	67.0853	99.6991	47.1187	47.6916	50.2963	31.3078	71.7797	39.8113	63.8975	64.242	46.5351	46.5658	42.9376	54.0396	52.6812	35.0856	61.2951	86.7427	44.2501	37.4954	52.8116	39.855	56.7259	66.8048	44.3567	46.9727
20	38.7401	33.4779	65.1159	60.182	35.2039	41.7216	41.3121	25.8128	79.1052	36.396	56.6095	64.7476	36.4354	39.1293	32.9669	45.8749	40.341	29.2845	36.1498	44.691	36.2128	29.1805	34.7612	29.6485	35.1656	39.8548	31.6069	33.8329
30	35.0506	31.6656	46.9828	57.8176	37.3621	31.7078	33.8934	32.9948	77.8388	45.2288	51.2	55.2162	31.3794	40.7522	30.3151	39.3149	35.3157	21.3114	33.3136	36.6978	33.8082	25.3215	32.7736	29.6228	26.201	35.3995	27.9687	37.21
40	35.1463	27.1743	46.6073	61.9213	33.4859	27.0363	28.3617	31.1238	78.2673	44.1594	61.3153	60.8606	34.4604	38.1081	28.8716	37.3012	31.086	22.0096	34.4546	29.6189	32.783	26.4273	37.3216	27.4281	17.6795	35.6034	26.9967	32.4697
50	30.8314	28.781	39.4667	70.4583	32.1827	37.2367	26.4606	29.31	56.7993	36.2611	63.5905	46.8803	28.8891	26.4774	30.0445	39.0364	35.2616	22.8851	32.8923	27.2802	32.8004	24.8345	23.9966	24.8837	20.7674	34.0426	28.7537	27.2137
60	33.7004	25.9817	40.2155	52.985	41.9195	29.6833	29.7359	33.7376	84.9462	50.9816	72.9999	67.7771	40.929	34.2959	25.3025	29.8394	30.7736	18.5743	23.266	31.1716	28.6726	20.9534	33.2633	26.7211	27.3152	23.3922	24.1814	21.82
B
	Total distance moved (m)
	WT	HT
1	205.933	232.402
2	218.201	188.587
3	410.316	305.474
4	262.848	403.063
5	265.257	227.273
6	257.341	215.077
7	369.561	210.06
8	298.309	184.287
9	271.217	448.737
10	264.059	252.838
11	265.764	369.613
12	311.187	359.724
13	303.254	218.628
14	361.501	225.329
15	432.233	190.438
16	423.843	245.406
17	253.709	225.459
18	351.603	149.15
19	292.124	221.371
20	259.098	256.202
21	245.097	208.527
22	346.463	164.213
23	291.745	214.928
24	283.961	178.159
25	310.673	183.855
26	320.934	235.097
27	327.099	183.864
28	299.868	199.519
C
	Center time in open field (s)
	WT
	1	2	3	4	5	6	7	8	9	10	11	12	13	14	15	16	17	18	19	20	21	22	23	24	25	26	27	28
10	53.419	131.662	63.2619	74.2394	54.2197	72.4376	82.1805	64.7634	53.7526	73.3177	77.6093	55.521	94.5718	75.6407	69.7349	91.6898	67.366	54.0863	62.5612	81.6926	106.571	66.098	60.7595	92.8242	100.344	106.438	119.951	95.4935
20	47.2463	62.7948	44.0098	31.5976	72.1039	60.4258	120.084	103.627	105.036	118.128	185.281	79.0441	83.0688	83.1732	92.9577	43.6427	61.6604	95.9191	83.7487	98.2421	135.433	107.639	101.199	103.702	127.012	86.4179	116.114	112.844
30	55.6545	107.376	51.2502	49.8822	101.7	83.4861	104.536	131.708	107.576	110.183	99.5975	82.2138	114.646	46.9208	76.4081	52.6515	78.6103	90.2299	182.612	169.507	96.6613	113.678	84.9498	127.296	104.703	106.104	79.8782	110.308
40	63.4621	92.4364	105.57	85.2835	115.346	78.1388	114.979	130.323	89.0828	128.926	185.682	83.9155	111.543	41.4072	79.4778	39.7723	169.833	98.2629	132.496	166.396	292.403	126.224	103.868	112.005	137.034	88.6535	82.3807	115.68
50	22.9224	171.584	107.806	122.754	81.7801	33.6329	83.3483	75.9039	72.3709	73.1716	126.987	111.806	201.697	110.742	124.088	42.575	87.5524	107.839	154.351	158.251	206.682	158.422	49.0147	150.481	72.6711	87.4523	50.4828	74.7732
60	112.41	57.7565	35.0343	116.547	97.4287	87.3522	91.0892	118.186	47.68	65.9646	82.4512	59.2952	150.957	153.526	117.081	65.9646	106.313	71.2698	147.344	137.038	120.522	105.646	81.4464	128.034	79.0862	92.6574	69.101	126.924
	HT
	1	2	3	4	5	6	7	8	9	10	11	12	13	14	15	16	17	18	19	20	21	22	23	24	25	26	27	28
10	70.4356	194.757	103.802	67.1658	77.2423	144.208	50.3159	250.745	151.648	137.948	120.898	101.299	141.605	148.178	113.978	137.902	252.247	186.382	117.482	43.943	123.321	220.85	182.712	84.3159	120.084	58.4239	58.2237	171.935
20	99.0221	105.937	37.6035	38.6378	44.944	123.254	70.469	300.594	31.9646	43.6301	156.908	48.3391	88.9871	51.5838	102	71.4366	282.535	193.756	139.97	50.3827	62.3277	126.357	168.632	23.6231	40.3729	22.7556	16.5495	79.6113
30	75.6155	75.1736	53.9862	25.4916	100.999	93.258	100.465	117.649	47.5132	33.6663	45.3778	40.6146	81.9469	124.956	195.091	91.0936	171.009	161.425	175.51	18.6182	67.7707	115.913	119.083	43.8429	24.1236	45.7114	23.2561	50.049
40	55.8213	160.757	51.2835	47.8802	31.2639	32.5986	141.923	60.3925	52.3513	47.2129	109.174	61.1932	74.8733	50.3663	46.4121	57.0848	289.2	122.504	63.2242	9.34248	36.131	266.077	151.682	22.5554	21.3712	70.7359	21.154	70.7693
50	29.1285	124.655	64.2296	125.122	37.5367	114.412	112.093	115.046	127.254	90.6888	63.996	66.9656	64.4631	46.1949	37.4367	22.9558	217.592	312.756	128.726	6.7733	64.2629	110.424	365.621	27.894	137.518	40.6398	51.05	132.53
60	39.1383	75.1069	96.9616	64.2629	25.892	102.701	49.1815	42.6417	103.839	39.2051	72.204	102.334	67.9665	92.2236	108.506	40.8066	317.181	63.4955	182.788	23.2895	97.1952	54.6535	180.881	18.0598	56.5887	12.0118	19.8528	88.8958
D
	Center time in open field (min)
	WT	HT
1	5.91857	6.15269
2	10.3935	12.2731
3	6.7822	6.79777
4	8.00506	6.14267
5	8.70964	5.29796
6	6.92456	10.1739
7	9.93695	8.74079
8	10.4085	14.7845
9	7.92497	8.57617
10	9.49485	6.53919
11	12.6268	9.47596
12	7.86326	7.01243
13	12.6081	8.66403
14	8.5235	8.55838
15	9.32912	10.0571
16	5.60493	7.02132
17	9.52225	25.4961
18	8.62678	17.3386
19	12.7186	13.4617
20	13.5188	2.53915
21	15.9712	7.51681
22	11.2951	14.9046
23	8.02062	19.4768
24	11.9057	3.67152
25	10.3475	6.66764
26	9.46205	4.17131
27	8.6318	3.1681
28	10.6004	9.89651
E			F			G			H				I
	Closed-arm entry number			Time in closed arm (s)			Open-arm entry number			Time in open arm (s)				Time in light chamber (s)
	WT	HT		WT	HT		WT	HT		WT	HT			WT	HT
1	28	27	1	202.398	236.632	1	9	9	1	64.1295	40.3061		1	115.78	153.083
2	20	24	2	274.602	184.714	2	11	15	2	88.2197	45.9116		2	76.2747	90.2884
3	32	13	3	161.091	68.467	3	43	51	3	110.708	110.575		3	86.8183	218.881
4	28	18	4	207.003	216.879	4	19	31	4	58.8576	104.035		4	66.4651	599.921
5	30	17	5	250.245	260.388	5	13	19	5	42.0412	102.3		5	71.0028	105.437
6	13	26	6	179.643	281.209	6	32	18	6	143.941	92.0234		6	149.279	173.436
7	42	9	7	293.954	74.4062	7	26	15	7	88.7536	299.56		7	117.982	82.3473
8	29	17	8	297.224	267.862	8	12	18	8	51.5171	112.844		8	96.2275	145.409
9	39	33	9	295.222	262.791	9	14	16	9	43.9097	65.9312		9	134.932	75.6741
10	37	25	10	308.769	112.71	10	19	26	10	56.3218	138.869		10	90.2884	72.4042
11	25	34	11	335.128	277.071	11	9	8	11	45.2443	66.5985		11	144.475	105.103
12	32	24	12	305.032	150.748	12	24	36	12	75.0735	116.914		12	74.0725	81.3463
													13	75.8743	57.7899
													14	99.0303	137.601
													15	182.912	75.1402
													16		161.625
J											K											L
	Number of calls											Duration of calls (ms)											Latency to first calls (s)
	P4		P6		P8		P10		P12			P4		P6		P8		P10		P12			P4		P6		P8		P10		P12
	WT	HT	WT	HT	WT	HT	WT	HT	WT	HT		WT	HT	WT	HT	WT	HT	WT	HT	WT	HT		WT	HT	WT	HT	WT	HT	WT	HT	WT	HT
1	50	72	33	440	39	484	3	124	64	349	1	0.02325	0.00603	0.01194	0.03249	0.00825	0.02934	0.00686	0.0187	0.00775	0.02377	1	19.076	0.0522	26.7056	0.0824	38.094	0.3806	9.4955	13.848	2.4033	0.0199
2	169	437	367	145	235	313	149	398	217	295	2	0.03972	0.02208	0.04548	0.03319	0.03498	0.05272	0.02253	0.05183	0.01372	0.03375	2	0.7306	23.1068	0.1546	3.0108	5.7441	22.0203	17.8183	0.4198	0.0819	0.0729
3	93	324	125	322	155	319	88	297	229	378	3	0.01351	0.02196	0.0195	0.03691	0.02791	0.04506	0.01208	0.03551	0.01776	0.02716	3	17.7871	0.1149	8.4915	0.9502	23.4836	5.9571	13.2835	5.5344	0.0765	0.1873
4	51	146	173	85	114	74	134	114	243	185	4	0.02126	0.01501	0.02645	0.01026	0.03388	0.0055	0.02281	0.01163	0.0325	0.01014	4	0.6543	0.7098	2.937	25.6798	23.191	54.1665	2.0416	23.9695	1.2308	0.0488
5	60	190	121	123	301	312	171	322	320	243	5	0.01466	0.03494	0.02952	0.03662	0.03356	0.03625	0.01419	0.05478	0.02903	0.02666	5	9.9729	56.8417	3.0584	36.9802	8.0209	27.3315	0.0606	11.7089	0.0002	1.3816
6	73	182	99	203	55	178	275	281	114	29	6	0.02594	0.02425	0.02097	0.02198	0.01918	0.03313	0.02231	0.04958	0.0185	0.00961	6	9.5308	1.6353	0.0716	18.6577	21.3224	28.034	1.4942	10.4053	4.3087	0.9446
7	30	233	37	332	316	308	101	178	84	58	7	0.01861	0.0233	0.01095	0.02581	0.04014	0.02897	0.033	0.02139	0.01065	0.00727	7	2.4345	0.0023	8.3624	26.3063	19.3123	17.0954	65.0468	16.8537	1.8053	8.6773
8	36	285	146	328	67	327	86	328	88	230	8	0.00853	0.02887	0.02428	0.02562	0.01519	0.03094	0.03206	0.04067	0.01173	0.03865	8	5.9717	0.2388	7.1664	5.2912	13.0439	12.7559	13.8406	35.374	0.1684	2.4066
9	92	190	388	27	319	99	109	92	173	109	9	0.02833	0.03348	0.03916	0.01069	0.0271	0.01265	0.02025	0.03082	0.02689	0.0192	9	5.8734	0.0087	0.0081	16.1866	1.1545	15.9936	13.622	44.2746	0.46	31.8748
10	173	71	46	245	98	341	100	156	178	323	10	0.02918	0.01225	0.02403	0.01472	0.02481	0.03503	0.02421	0.021	0.02035	0.01796	10	0.0401	19.1083	5.6424	1.4295	7.9342	21.4988	10.4002	28.6259	5.9581	0.0494
11	50	149	45	275	50	206	49	245	81	333	11	0.01817	0.02544	0.02753	0.0442	0.0264	0.04925	0.01342	0.03305	0.02075	0.04357	11	11.2522	15.0425	11.6679	3.5957	26.371	16.2383	21.869	1.6271	8.0642	0.0174
12	178	110	373	10	219	114	106	337	241	540	12	0.03492	0.02457	0.03513	0.00543	0.03758	0.00637	0.01811	0.02978	0.01587	0.03148	12	13.5866	33.1371	4.9943	65.1742	0.8432	11.1462	5.976	0.0007	0.1034	0.5565
13	111	63	37	250	157	346	224	530	156	419	13	0.01803	0.00524	0.0044	0.01465	0.0278	0.04105	0.01342	0.03877	0.02243	0.02999	13	0.3287	37.2052	8.5253	33.454	39.6671	0.8296	8.2823	7.0005	5.1573	0.0302
14	241	11	6	29	141	182	41	81	81	366	14	0.02583	0.0086	0.00525	0.01027	0.01024	0.03394	0.01882	0.04088	0.01948	0.0322	14	5.2254	38.1296	0.0081	34.0584	3.6779	20.4037	23.7749	59.927	0.6594	0.0768
15	91	258	0	20	68	231	16	288	241	446	15	0.03127	0.01877	0	0.01091	0.00333	0.02887	0.00466	0.02121	0.02181	0.02037	15	7.553	0.0629	180	49.2436	22.8549	0.4904	0.7836	0.0002	1.0176	0.0289
16	317	162	78	29	46	97	200	273	357	345	16	0.03618	0.0201	0.0287	0.00611	0.03083	0.01664	0.0297	0.02153	0.03025	0.02634	16	19.4122	30.3313	22.4053	6.7532	1.5065	2.3644	2.1089	4.6804	3.8809	0.0744
17	13	211	121	2	120	5	107	221	2	493	17	0.02475	0.01808	0.01119	0.00275	0.0204	0.00666	0.02319	0.01746	0.0061	0.01817	17	11.8359	1.8967	10.4296	0.1354	29.0191	66.7297	44.4193	17.131	26.9501	10.3096
18	253	68	129	13	116	175	75	253	194	239	18	0.02879	0.00949	0.03698	0.00486	0.0257	0.0054	0.01935	0.01011	0.02193	0.01311	18	19.3917	30.4015	27.84	2.1847	12.6379	7.4114	23.1449	18.4281	0.1297	3.2491
19	145	326	170	7	29	7	205	480	98	340	19	0.0429	0.02937	0.04202	0.0092	0.02116	0.02985	0.02167	0.04182	0.02269	0.02402	19	17.5562	0.024	37.3977	41.1363	4.078	45.8516	10.6142	0.2823	13.0795	0.8896
20	181	96	49	162	152	49	108	19	123	31	20	0.03353	0.03261	0.03686	0.02908	0.03146	0.03877	0.0405	0.02226	0.01998	0.01526	20	26.2676	26.4189	40.4951	7.8827	27.1912	93.6355	12.8906	40.0919	0.1697	24.0512
21	193	246	176	13	129	269	188	299	165	50	21	0.03676	0.03427	0.03102	0.00983	0.02772	0.03442	0.03726	0.03398	0.02533	0.01657	21	17.3314	1.4192	17.9952	111.561	3.8568	7.2345	14.5172	4.6118	1.8288	0.6781
22	74	81	190	132	111	69	221	404	31	108	22	0.03471	0.01383	0.01952	0.0121	0.0159	0.02869	0.02721	0.03883	0.01812	0.02456	22	81.2428	13.7024	18.8497	26.969	21.8979	2.0966	5.4568	0.7782	13.7369	30.3265
23	220	101	77	12	102	76	291	369	203	133	23	0.02735	0.01975	0.02434	0.01081	0.03084	0.0186	0.03638	0.01849	0.028	0.01385	23	0.075	36.6881	2.6752	80.1902	3.6656	15.8881	10.2417	0.0076	4.9118	0.2826
24	258	60	29	0	76	44	48	38	0	86	24	0.03116	0.01654	0.02263	0	0.02508	0.00456	0.02746	0.00845	0	0.00851	24	0.8015	4.0258	30.6874	180	1.9427	26.721	5.42	27.5645	180	1.1704
25	197	175	20	5	16	73	57	219	89	311	25	0.02405	0.02321	0.00318	0.00246	0.00423	0.00779	0.01163	0.00909	0.00854	0.03414	25	8.4531	11.3011	11.8912	75.4818	3.8858	43.6531	10.8467	2.2952	6.1644	23.3681
26	379	22	134	9	132	149	212	258	160	430	26	0.02868	0.01992	0.02431	0.02914	0.01727	0.0196	0.00932	0.01273	0.01667	0.01967	26	2.7829	13.8649	21.2638	19.7007	13.0621	9.6494	4.4249	17.0414	1.4553	0.2365
27	366	166	99	7	40	92	87	137	86	318	27	0.02143	0.02619	0.01952	0.00265	0.01005	0.01764	0.0259	0.01286	0.02072	0.02095	27	0.7749	1.4551	27.0494	155.364	16.9761	33.6998	44.0872	6.6137	21.0869	0.0573
28	423	17	46	77	29	337	75	194	2	628	28	0.02917	0.01357	0.03128	0.01129	0.00814	0.02323	0.02451	0.02332	0.00545	0.03095	28	0.9495	26.5013	39.9848	81.7103	21.9678	31.1623	27.8592	8.5542	12.3622	0.2119
29	250	71	231	71	166	347	141	408	73	354	29	0.02405	0.01267	0.03082	0.03058	0.03105	0.04136	0.03412	0.02669	0.03037	0.03984	29	11.4897	18.4276	0.7828	0.0002	0.4344	11.0999	31.4606	3.0097	2.7312	0.0002
30	16	136	135	191	261	228	196	521	38	130	30	0.01638	0.02113	0.02224	0.01461	0.0323	0.02411	0.02836	0.03426	0.01062	0.03964	30	31.9992	23.5002	17.261	29.4159	13.4164	1.1404	12.1185	0.8532	6.5776	0.0015
31	145	136	77	11	259	197	56	343	299	232	31	0.04736	0.01852	0.02725	0.00764	0.03407	0.02542	0.02683	0.02251	0.03902	0.01987	31	1.4917	39.4626	13.9737	26.8216	22.5121	4.5012	1.4256	2.5656	0.0532	3.1157
32	96	147	63	116	120	249	75	72	75	521	32	0.02072	0.0266	0.00538	0.02398	0.00872	0.0183	0.00935	0.02653	0.01642	0.03426	32	0.1984	30.1575	0.5757	0.0834	10.5139	5.9448	9.4581	35.5834	1.0319	0.0624
33	3	43	6	19	162	321	79	148	122	104	33	0.0033	0.01624	0.0028	0.03466	0.01734	0.02608	0.00745	0.02589	0.00911	0.02059	33	13.8242	38.2881	4.4285	47.0732	34.8556	0.5506	1.1338	16.6021	2.3907	40.7626
34	217	30	20	226	115	319	282	329	30	172	34	0.01906	0.0119	0.00802	0.01805	0.01392	0.02345	0.0194	0.02714	0.00895	0.02677	34	28.7457	32.9057	61.8483	27.821	8.6394	2.8523	0.3041	21.6194	6.8165	13.4983
35	8	11	58	131	331	488	143	461	38	140	35	0.00507	0.00675	0.01035	0.01608	0.02177	0.02523	0.02118	0.02319	0.01566	0.01275	35	24.5882	143.886	52.1382	18.0705	0.268	0.8	3.7194	0.3179	17.8792	34.6682
36	11	67	161	16	245	28	121	195	14	417	36	0.0081	0.01831	0.01566	0.00672	0.02495	0.0194	0.01731	0.03012	0.00807	0.04041	36	29.4556	0.7129	30.3482	1.849	0.5032	0.1315	13.078	42.7873	0.418	7.1503
37	186	85	14	173	93	208	28	417	40	303	37	0.02279	0.02663	0.00563	0.01256	0.0162	0.04149	0.01662	0.03655	0.01098	0.04234	37	30.424	1.6967	37.6757	0.1077	21.4128	0.0002	8.3878	3.7483	4.9571	66.1125
38	260		52		91		16		105		38	0.02406		0.0147		0.02749		0.01765		0.00999		38	0.0509		1.453		38.6552		70.1396		7.8379
39	75		66		129		121		130		39	0.02383		0.01924		0.01903		0.02315		0.0112		39	0.962		0.4538		5.4727		35.8868		73.4159
40	197		5		167		72		130		40	0.01606		0.00394		0.01654		0.01034		0.00967		40	0.5255		26.7084		7.9882		22.9056		8.3947
41	141		17		121		216		86		41	0.03674		0.01875		0.02582		0.03423		0.02635		41	12.641		3.1439		1.9013		11.7404		2.9775
42	56		31		24		78		6		42	0.03298		0.0339		0.0252		0.02511		0.01153		42	19.7841		1.9376		23.0415		4.3192		0.6617
43	63		17		14		30		251		43	0.01558		0.00372		0.00614		0.01025		0.00997		43	1.506		95.4017		65.4481		13.0803		17.676
44	186		44		26		219		363		44	0.03077		0.0153		0.01367		0.02483		0.02143		44	3.1966		1.8286		70.0252		4.2117		9.2367
45	68		2		0		13		257		45	0.01844		0.00455		0		0.00493		0.02099		45	1.1804		146.466		180		18.1429		29.9957
46	71		8		1		4		356		46	0.03396		0.00317		0.012		0.00712		0.03067		46	0.3235		174.82		93.7909		38.8761		0.3837
47	59		16		52		119		19		47	0.00946		0.00873		0.01299		0.03614		0.0162		47	22.3237		31.5018		13.8181		54.9332		96.8232
48	291		206		76		127		130		48	0.03361		0.01633		0.01069		0.02064		0.02938		48	0.0028		2.0234		3.6687		3.5607		12.4544
49	67		174		100		263		58		49	0.02728		0.0313		0.03547		0.02357		0.0215		49	9.7507		35.2954		51.1452		17.2464		15.6851
50	21		247		174		78		126		50	0.01187		0.03487		0.01775		0.02253		0.01514		50	3.6096		26.8175		2.2755		18.1818		0.6778
51	204		1		86		138		97		51	0.03287		0.0084		0.02745		0.01112		0.01945		51	40.4382		90.5571		3.7089		17.6691		65.2119
52	66		49		61		206		33		52	0.04568		0.03414		0.03521		0.03165		0.03179		52	7.212		0.3939		1.5216		7.3205		0.4761
53	143		133		88		163		72		53	0.02309		0.02288		0.02214		0.02653		0.02757		53	34.0756		35.9029		12.8304		11.0236		4.0284
54	1		108		103		124		51		54	0.0343		0.0245		0.02261		0.01237		0.01756		54	29.24		0.1287		40.6143		9.0268		95.0389
55	139		72		170		311		197		55	0.04676		0.0422		0.03294		0.03489		0.03512		55	37.9151		34.4038		1.3155		2.1122		1.0068
56	58		29		267		264		127		56	0.01444		0.02225		0.02078		0.01493		0.00826		56	1.9404		56.1387		2.4053		1.0455		0.7825
57	96		7		42		215		118		57	0.02235		0.01305		0.01071		0.01431		0.0157		57	0.2296		132.431		30.4294		2.5515		20.7641
58	56		122		284		199		116		58	0.03634		0.0216		0.01459		0.01607		0.01643		58	38.8774		6.3057		0.9492		29.5137		54.0659
59	25		44		317		338		236		59	0.0122		0.01274		0.02587		0.02097		0.02089		59	24.951		14.8572		0.5834		0.8852		1.6327
60	1		57		351		413		216		60	0.0273		0.02838		0.02447		0.03159		0.0216		60	37.3972		41.3132		6.7351		9.122		24.4725
61	74		115		217		174		417		61	0.02249		0.02763		0.02781		0.02349		0.0295		61	25.9008		13.4103		8.3276		0.7439		0.14
62	107		35		291		332		488		62	0.02656		0.02086		0.02891		0.03148		0.03489		62	32.7769		3.84		0.1402		8.5775		1.0657
M
	Distance moved in open field (m)
	WT
	1	2	3	4	5	6	7	8	9	10	11	12	13	14	15	16	17	18	19	20	21	22	23	24
4	20.0481	9.27602	13.6417	12.5309	10.3488	11.8136	10.2544	9.85581	22.0887	9.70725	11.991	13.0593	11.2947	16.6458	15.5576	10.5879	11.2719	9.234	11.7156	13.9293	18.8158	17.8166	11.3954	12.6793
8	19.7699	7.32297	11.7674	5.27183	12.5709	23.1923	18.6312	9.73782	22.0202	13.3748	23.8221	6.36609	16.6681	15.1151	15.088	20.4974	14.0351	11.0497	13.9823	11.8542	13.307	15.3511	7.99703	10.5748
12	19.1526	14.3573	16.9925	11.011	12.0714	15.406	14.898	4.69562	17.0702	11.0884	13.3385	12.409	11.5513	13.4639	10.8358	9.66861	13.3157	13.2536	6.75148	15.3323	14.7815	10.5601	4.42787	9.62061
16	6.02998	9.20403	12.7745	6.59616	9.53487	20.7439	15.1566	10.5873	9.28438	12.489	15.4745	6.42195	16.3297	12.4472	14.4603	15.7517	6.80275	12.9854	11.6894	11.2365	4.59407	9.89113	11.0214	13.9542
20	17.6432	13.7889	4.65593	13.8541	12.7449	5.48704	12.2436	8.35839	13.1115	10.2483	12.3477	13.4342	12.2221	10.5831	8.9191	13.441	14.8524	10.6827	10.3992	6.65451	14.5672	11.4683	8.01368	6.83305
	HT
	1	2	3	4	5	6	7	8	9	10	11	12	13	14	15	16	17	18	19	20
4	8.11826	9.36589	8.93746	15.4137	13.4348	10.7566	9.60613	14.1953	11.0812	8.6459	10.7744	6.97284	7.77805	4.57091	9.37004	9.38022	9.86541	17.1008	11.7854	13.2215
8	8.97416	11.1934	10.1984	10.5223	12.4533	7.31314	8.86437	9.09352	5.31125	16.3803	7.89614	8.2507	15.9718	13.569	24.5556	9.13779	10.5074	16.8934	6.57955	10.6306
12	9.44871	10.0964	9.49143	12.1163	16.5661	10.3888	3.78717	11.4948	6.96338	3.48257	6.92744	11.9102	5.68969	10.4345	19.4556	13.0284	12.9453	11.6148	10.4165	8.18902
16	9.10318	8.39264	13.9659	9.66496	11.5159	15.1294	6.73583	4.45897	13.5111	11.8679	12.3871	10.3035	15.4494	10.069	7.9053	9.17806	12.9033	10.4193	11.3036	5.28984
20	7.95742	10.9822	4.52798	18.8754	6.82503	13.4812	8.37581	16.3398	3.8115	2.12723	10.8655	8.30132	10.7668	8.04008	9.33283	11.9653	9.41819	7.80082	7.80364	24.4797
N
	Total distance moved (m)
	WT	HT
1	82.6439	43.6017
2	53.9492	50.0305
3	59.832	47.1212
4	49.2639	66.5926
5	57.271	60.7951
6	76.6428	57.0691
7	71.1838	37.3693
8	43.235	55.5824
9	83.5749	40.6784
10	56.9077	42.504
11	76.9738	48.8506
12	51.6905	45.7385
13	68.0659	55.6558
14	68.2551	46.6836
15	64.8607	70.6194
16	69.9466	52.6898
17	60.2779	55.6396
18	57.2054	63.8292
19	54.5379	47.8886
20	59.0069	61.8106
21	66.0657
22	65.0872
23	42.8554
24	53.6621
O
	Center time in open field (s)
	WT
	1	2	3	4	5	6	7	8	9	10	11	12	13	14	15	16	17	18	19	20	21	22	23	24
4	27.3935	5.70558	10.3435	9.94307	3.73699	21.421	7.30715	1.50147	7.07195	8.07457	4.7046	10.9107	5.37192	11.6114	13.8469	8.74189	6.70657	10.5103	2.50245	3.57016	5.37192	4.63787	1.93523	8.30813
8	30.0628	4.20412	11.0441	18.4514	14.4141	21.9549	17.0167	12.6457	34.3019	9.34248	22.2218	3.70363	20.2198	10.0765	16.2159	21.3543	16.1491	7.80764	9.40922	6.47301	1.63494	8.30814	10.4436	2.83611
12	34	15.0481	17.684	6.07261	8.70852	25.0912	22.8841	1.6683	35.2678	3.73699	19.3856	10.4436	17.7507	8.77525	15.7487	29.8625	45.7733	34.5004	2.50245	10.6771	10.6438	7.37388	1.60157	4.90481
16	3.00294	11.4779	25.7919	5.17173	21.9882	26.0922	15.3199	10.9774	30.997	10.21	21.8213	0.700686	14.9146	16.049	27.6271	19.9195	4.67615	15.5819	4.8047	13.7468	0	6.00588	8.10794	5.97251
20	14.2806	27.4936	0	15.3818	14.6477	98.0545	23.2813	8.67516	56.9809	16.1825	7.87438	20.3867	13.0795	12.9126	8.94209	33.3994	27.6938	38.7713	10.2434	2.40235	16.1158	14.5809	9.64277	0
	HT
	1	2	3	4	5	6	7	8	9	10	11	12	13	14	15	16	17	18	19	20
4	4.90481	2.03532	19.6859	78.3083	29.1269	5.80568	5.40529	11.6431	37.5367	13.4799	27.3601	5.23846	12.4122	0.50049	4.77134	3.16977	34.065	37.7036	7.54072	11.9784
8	9.14228	13.1796	11.5113	38.8397	13.4148	8.00784	18.4847	6.00752	3.60353	26.7262	53.9195	3.67026	26.7563	31.0971	22.3886	4.93817	15.35	37.6035	4.10402	12.3454
12	30.9637	15.4151	11.3778	61.5937	41.3739	12.7458	0	9.44258	38.1039	0	11.7115	18.1845	206.138	30.1295	16.9833	11.8783	41.3739	18.6133	6.6732	1.70167
16	14.4141	10.2434	37.47	22.2885	116.247	28.2544	2.13542	0.360474	8.00784	24.3571	32.9322	2.93621	58.891	25.3915	31.3307	7.40725	56.5553	16.8816	20.9539	74.6999
20	12.4455	11.211	0	54.6536	22.0883	42.6483	12.0785	20.56	188.176	0	30.8302	91.5147	17.4756	95.6937	90.5805	29.2286	11.9116	52.7582	81.3129	29.8691
P
	Center time in open field (s)
	WT	HT
1	108.74	71.8704
2	63.9293	52.0844
3	64.8635	80.045
4	55.0206	255.684
5	63.4955	222.251
6	192.614	97.4621
7	85.8091	38.1039
8	35.4681	48.0136
9	164.619	275.428
10	47.5465	64.5632
11	76.0077	156.754
12	46.1452	121.544
13	71.3365	321.673
14	59.4248	182.812
15	82.3807	166.054
16	113.278	56.6221
17	100.999	159.256
18	107.172	163.56
19	29.4622	120.585
20	36.8694	130.595
21	33.7664
22	40.9067
23	31.7311
24	22.0216
C
	Distance moved in Laboras (m)																										Total distance moved in Laboras (m)
	WT																										WT	KO-H
	1	2	3	4	5	6	7	8	9	10	11	12	13	14	15	16	17	18	19	20	21	22				1	267.169	239.8
14:00	23.361	16.366	18.407	10.447	9.7	16.898	15.975	22.577	13.007	19.093	14.466	11.574	28.491	33.029	10.098	15.195	22.89	10.577	12.895	14.064	9.582	13.132				2	193.976	129.212
16:00	23.699	11.016	18.947	8.495	9.945	12.707	13.404	23.922	10.351	25.675	18.07	8.422	34.741	20.562	13.35	15.507	18.289	10.255	16.086	10.779	14.65	18.239				3	218.286	191.716
18:00	17.274	11.138	14.764	8.38	9.278	21.276	12.14	26.606	10.437	33.126	20.652	13.217	24.402	12.297	9.572	14.643	17.414	8.119	15.6	9.022	14.741	21.759				4	137.387	227.747
20:00	25.713	21.081	18.19	12.645	5.873	15.085	22.991	13.375	13.108	12.18	19.638	7.102	29.731	30.224	9.252	19.162	9.951	7.865	19.977	19.324	19.864	24.597				5	137.146	217.109
22:00	10.336	5.411	7.982	9.174	14.449	17.345	1.526	5.358	10.763	5.666	1.017	4.275	11.141	5.649	9.457	15.089	2.676	11.25	2.459	6.427	12.401	6.774				6	226.237	268.088
0:00	21.91	20.28	16.855	9.914	8.687	15.896	12.226	7.34	12.524	11.406	20.296	15.094	15.858	24.93	11.526	16.305	18.58	6.954	14.844	15.606	8.309	17.433				7	241.332	290.63
2:00	1.754	5.043	2.379	0.672	0.984	4.43	14.155	3.202	2.053	5.844	8.403	0.32	9.283	0	0	0	3.871	3.517	0.446	0.024	1.821	0.923				8	198.718	269.839
4:00	7.653	1.171	0.738	0	0.143	4.285	7.516	0	3.671	3.826	5.94	9.527	4.496	6.852	7.83	0	3.563	0	3.41	1.244	3.532	4.601				9	133.678	200.316
6:00	1.033	2.694	2.504	3.562	1.6	1.729	2.19	2.125	1.096	0.017	1.222	0	0.876	0	2.58	4.215	1.303	3.478	2.73	0	0.946	0.012				10	236.988	227.521
8:00	0.729	1.711	0	1.824	3.069	4.059	2.735	1.275	0.085	4.118	2.133	5.806	0.933	9.04	1.559	3.474	3.182	0	0	6.543	1.624	4.235				11	231.404	265.251
10:00	0.697	1.728	1.353	2.097	2.158	0	4.365	1.671	2.448	0.749	1.69	0	0	0	1.378	0.028	0.937	4.62	3.352	0	1.865	2.263				12	182.46	305.307
12:00	6.67	5.42	2.571	5.194	2.007	4.019	6.241	2.665	2.09	3.571	7.518	6.655	1.6	7.438	5.701	4.1	3.704	1.7	4.524	10.386	7.633	8.992				13	299.647	303.019
14:00	19.459	14.817	18.205	7.33	11.028	19.832	11.012	12.284	8.32	12.693	13.045	13.89	17.483	12.022	5.403	18.186	19.605	7.349	7.835	22.749	16.481	12.558				14	255.167	262.654
16:00	19.678	17.563	12.006	7.58	9.683	15.218	13.455	20.19	6.152	25.613	18.497	15.025	21.871	7.132	14.5	17.528	13.341	7.402	11.275	15.371	11.31	13.868				15	141.975	203.396
18:00	27.284	20.112	21.285	9.547	6.971	17.19	24.979	19.35	8.007	38.749	20.143	19.991	26.164	8.304	10.191	17.301	15.148	8.017	14.959	12.282	14.114	13.798				16	208.032	255.388
20:00	11.257	5.087	21.503	12.618	12.763	12.507	14.555	11.049	9.987	7.261	18.741	8.127	25.784	30.164	6.81	19.67	12.384	15.855	15.818	6.878	14.598	7.688				17	217.521	290.651
22:00	9.452	10.556	4.32	8.75	1.247	19.924	13.807	11.336	0.121	2.828	1.397	10.254	19.135	5.856	4.181	4.664	14.99	3.588	6.132	23.776	13.639	14.753				18	139.736	285.178
0:00	19.084	10.456	23.376	5.22	11.583	14.915	12.446	7.548	11.591	14.169	19.645	14.19	11.047	9.375	9.874	11.85	17.989	5.636	4.77	2.799	8.52	6.295				19	172.6	206.544
2:00	6.679	0.887	1.83	4.451	0.618	0.4	0	0.647	0	2.99	1.085	0	6.831	8.119	0	0	4.314	0.605	2.604	1.641	1.984	1.653				20	196.613	241.897
4:00	4.27	3.118	4.39	0	3.979	3.172	10.506	0	0	0.197	4.594	3.595	4.23	7.165	3.046	0	2.348	4.838	0.907	3.471	0	3.249				21	190.9	307.294
6:00	0	0	0.756	0	3.264	0	6.558	2.649	3.793	2.926	0	6.372	0.525	0	0	5.766	3.455	0.057	3.044	0	1.99	0				22	209.956	304.875
8:00	0.629	2.884	2.302	2.974	0.071	0	2.037	0.877	0	0	3.913	0	1.182	4.218	1.991	0	0.196	5.511	0.449	4.752	1.108	6.489				23		182.642
10:00	0	2.078	0	1.937	0.651	1.965	6.636	1.414	2.658	3.555	3.953	2.941	1.624	4.954	1.472	2.24	4.689	3.403	3.697	1.829	0	2.232				24		233.873
12:00	8.548	3.358	3.621	4.576	7.395	3.385	9.875	1.257	1.416	0.736	5.348	6.084	2.219	7.836	2.205	3.108	2.701	9.14	4.785	7.648	10.187	4.413				25		226.003
	KO-H
	1	2	3	4	5	6	7	8	9	10	11	12	13	14	15	16	17	18	19	20	21	22	23	24	25
14:00	16.336	24.64	17.365	15.02	13.235	12.059	28.896	18.546	26.384	18.612	23.522	38.91	16.957	16.367	17.752	20.789	7.817	7.422	17.959	5.548	16.401	17.621	10.267	14.376	15.064
16:00	22.686	24.295	9.6	9.529	12.545	9.831	22.341	13.18	9.31	20.774	19.464	8.635	28.253	19.165	16.3	21.836	12.029	31.097	22.994	5.576	5.133	24.755	9.176	18.769	17.76
18:00	13.03	27.415	10.405	17.596	12.631	4.479	31.776	16.667	14.233	19.523	16.254	27.77	18.899	23.957	12.922	30.203	23.861	15.258	23.15	6.569	22.3	32.145	11.449	16.12	20.654
20:00	17.975	5.51	14.653	12.795	16.277	7.699	15.652	17.646	19.202	9.972	4.648	22.677	13.836	11.908	12.756	19.059	22.864	22.622	17.017	9.409	13.72	15.784	6.979	26.288	20.051
22:00	22.708	14.613	4.033	10.532	13.753	5.758	14.015	12.792	19.664	14.505	19.524	13.117	7.597	8.893	4.829	9.404	5.659	12.034	25.441	10.042	22.093	10.071	12.245	21.397	14.734
0:00	17.292	21.401	14.574	9.411	15.438	25.844	15.605	19.888	23.263	4.217	11.288	13.174	7.807	12.402	12.707	12.413	27.687	6.467	2.762	8.362	24.254	9.996	10.781	12.053	2.742
2:00	0	0	0.916	0	1.607	1.054	2.394	5.807	1.39	0	3.112	0	0	0	3.6	2.834	0	0	0	9.667	0	2.775	0.065	0	0.794
4:00	10.957	0	0	0	2.069	0.483	2.076	0	0.198	2.505	1.983	5.531	4.987	1.897	0.651	0	3.046	0.079	0.099	1.691	3.547	1.105	0	1.014	0
6:00	0	1.444	1.698	5.235	7.527	0.132	0.192	3.617	0	0.024	2.77	0.472	5.93	4.557	1.003	5.905	2.167	10.912	0	0	0	0	0.991	0	0.479
8:00	3.322	0	0.183	0	0.077	0.535	0	0	1.381	2.327	0	8.778	3.631	0	0.837	0.228	0	10.258	1.318	1.011	0	4.412	0	3.838	7.744
10:00	0	1.77	0.286	5.141	9.168	0	2.884	0.171	1.06	0.501	2.963	0.973	3.519	0	0.618	0.016	4.779	0.444	0	9.851	7.826	7.045	3.126	4.236	5.151
12:00	4.156	19.12	2.068	6.586	0.872	1.461	8.676	6.149	9.258	3.046	9.918	1.629	8.578	4.188	1.957	1.732	14.511	10.762	16.045	27.181	9.217	14.779	15.773	20.13	12.225
14:00	25.282	16.244	10.501	15.723	9.935	19.947	19.066	18.98	11.814	16.04	20.144	15.651	27.657	14.167	18.718	19.287	32.343	15.942	24.679	21.986	20.494	11.999	31.74	13.917	12.944
16:00	16.306	19.083	5.662	21.663	22.825	10.62	27.532	20.341	19.734	21.252	25.483	31.879	37.849	43.196	18.078	19.492	27.777	25.038	3.386	18.977	31.256	28.493	23.263	13.042	23.7
18:00	24.27	14.671	12.989	6.326	20.405	12.281	16.072	33.91	19.883	5.107	19.382	34.861	34.378	32.864	22.176	19.654	21.766	35.892	4.295	15.402	16.648	35.822	10.261	18.895	9.632
20:00	6.741	11.951	3.248	18.969	12.103	17.399	9.368	17.797	33.621	27.92	19.528	15.893	9.682	18.047	8.873	24.841	21.423	16.128	3.163	7.239	25.274	26.968	12.401	12.985	33.578
22:00	22.26	14.61	6.316	15.853	14.861	27.722	13.14	32.139	14.943	11.123	13.372	24.186	19.477	13.976	19.968	10.933	9.824	11.657	2.64	32.734	14.859	14.421	12.945	17.151	10.247
0:00	12.296	6.196	5.296	10.281	22.498	28.989	15.184	36.304	25.617	4.599	6.637	13.83	26.185	6.209	14.922	17.063	24.522	6.631	1.299	5.057	20.936	12.124	5.328	9.536	1.689
2:00	18.088	0.707	0	2.032	0	0.625	0.655	3.119	0.011	0	0	1.241	1.11	0.806	1.255	0	0	0	0	3.367	13.213	1.904	0	0.647	1.07
4:00	0.319	1.435	2.03	1.597	3.375	2.449	2.431	1.069	0	0.055	0.742	1.1	0	3.203	0	3.695	1.473	0.369	1.83	0	0	0	0	0.486	0
6:00	1.154	0	0.077	0	0	2.141	0	1.387	8.949	6.783	4.437	8.171	2.424	1.465	7.591	0	19.061	0	0	1.118	13.89	7.081	0.172	0	5.9
8:00	0	0	1.487	0	8.02	0	2.896	0	0.422	4.396	0	1.954	13.311	17.372	0	0	0.837	18.167	0.059	0	0	7.76	0.013	2.88	7.124
10:00	0	0	0	0.209	0	0	0.305	0	0	0.187	0.17	0	2.322	0	0.323	4.633	0	8.386	12.889	10.55	15.184	0.564	0.272	1.501	0.34
12:00	10.073	14.695	5.823	7.218	8.525	25.602	16.932	11.121	9.502	6.849	2.18	14.877	8.629	8.014	5.561	11.371	7.206	19.615	25.519	30.558	11.048	17.252	5.395	4.612	2.38
D
	Rearing (sec)			Climbing (sec)
	WT	KO-H		WT	KO-H
1	1944.8	2360.06	1	31052.5	30708.1
2	1633.5	1410.93	2	30310.7	22129.2
3	2790.79	2364.7	3	49554.3	34537.4
4	1213.65	2839.93	4	49665.5	29770.1
5	1542.44	3236.32	5	35859.2	15630.4
6	2344.92	2489.46	6	23369.8	34217.8
7	1981.32	4936.58	7	40403.5	26044.8
8	1856.47	3332.99	8	27656.9	14670.5
9	1062.95	1792.92	9	37027.4	20234.2
10	3278.44	3628.48	10	25145.9	31009.8
11	1596.02	4207.29	11	44260.1	36099
12	1613.03	6003.48	12	27586.9	20261.8
13	2480.01	3815.01	13	37312.8	29587.1
14	2381.9	4185.09	14	34723.4	9631.35
15	1778.48	3210.39	15	29562.7	11163.8
16	3035.65	3837.54	16	13279.2	17496.4
17	2157.33	5902.79	17	16268.9	31098.7
18	2069.58	6800.09	18	45020.7	21174.5
19	1826.29	12636.5	19	38672.5	20437.7
20	3299.2	9916.89	20	29660	32735.2
21	2431.53	8350.08	21	36309.5	24398.7
22	2862.16	6769.13	22	46677.4	27983.5
23		4537.38	23		19442.5
24		5776.59	24		33742.3
25		5471.25	25		26700.2
E
	Distance moved in Laboras (m)														Total distance moved in Laboras (m)
	WT														WT	KO-B
	1	2	3	4	5	6	7	8	9	10	11	12	13	1	261.87	407.769
14:00	21.374	10.046	10.312	7.398	4.046	3.548	15.259	6.826	9.331	11.188	19.994	8.667	23.505	2	294.907	258.028
16:00	22.1	23.77	7.756	31.667	16.591	17.413	27.355	33.105	6.05	17.405	24.762	7.423	24.588	3	227.872	406.138
18:00	28.563	14.019	19.006	18.727	14.43	14.713	14.759	29.957	11.925	15.761	15.688	15.807	30.829	4	245.278	238.353
20:00	29.451	24.574	33.68	16.202	4.003	28.531	8.495	20.785	14.38	17.208	5.376	35.781	26.173	5	229.886	446.026
22:00	17.304	14.541	5.604	19.022	16.692	17.321	9.399	2.522	26.474	18.153	10.744	18.182	46.565	6	320.675	368.739
0:00	18.057	11.88	8.332	21.139	25.426	10.75	8.986	13.26	47.571	13.591	8.089	16.835	22.131	7	280.798	322.025
2:00	16.431	22.99	6.688	0.656	0.294	13.135	3.585	9.926	8.099	0.244	4.294	10.245	0	8	213.005	282.619
4:00	4.899	0	5.273	5.286	8.49	5.077	3.948	3.814	15.819	2.809	4.185	0.531	0	9	439.938
6:00	7.596	2.801	3.456	1.253	0.915	4.966	0.643	1.251	2.292	4.044	3.99	0.151	7.831	10	207.055
8:00	0.012	9.579	2.016	3.529	17.929	0.6	2.54	2.247	24.263	3.14	0.862	10.68	5.525	11	216.254
10:00	2.46	18.923	3.448	14.256	8.708	7.144	6.116	1.259	17.509	4.735	2.192	3.188	3.246	12	335.517
12:00	3.942	1.5	1.428	3.921	31.34	5.426	0.849	4.798	0	4.604	7.315	0	3.315	13	414.048
14:00	5.498	17.095	6.331	12.401	13.937	5.139	5.263	9.768	29.715	17.437	24.815	24.35	24.209
16:00	18.02	30.673	24.086	27.089	49.945	14.756	25.248	21.189	33.322	21.209	15.884	31.335	33.282
18:00	25.163	13.323	23.744	24.147	22.28	19.853	33.539	20.83	31.133	9.455	9.424	20.211	44.663
20:00	12.266	17.041	21.838	6.411	6.042	15.536	8.715	19.89	27.814	7.8	12.624	52.756	38.37
22:00	13.692	7.244	5.396	7.164	31.231	17.625	9.658	8.72	27.399	8.028	9.583	43.189	35.243
0:00	17.326	8.165	6.338	6.458	2.199	12.494	20.918	18.25	55.419	2.979	13.911	23.721	14.9
2:00	0.645	12.382	6.631	8.976	9.367	4.098	8.233	8.321	8.653	1.445	0.012	0.049	0
4:00	12.169	1.519	0.367	3.946	3.468	4.194	3.244	3.476	2.217	4.744	7.345	0.947	5.244
6:00	15	0	5.274	0	0.194	0.807	1.071	0	0	0.093	5.056	0.013	10.466
8:00	8.601	0.267	0	8.231	6.423	3.09	3.118	2.295	5.87	3.5	4.026	0.798	1.874
10:00	9.295	8.646	4.799	10.573	0.216	2.291	2.783	1.307	10.295	6.512	2.466	0	5.615
12:00	10.813	9.819	1.204	3.416	0.742	1.38	4.147	1.481	24.388	10.97	3.618	10.658	6.475
	KO-B
	1	2	3	4	5	6	7	8
14:00	14.19	6.366	11.166	15.88	2.497	4.28	18.137	2.85
16:00	28.458	44.469	13.884	24.455	7.678	42.664	36.884	10.453
18:00	36.993	42.297	14.686	18.752	32.623	29.43	29.605	8.949
20:00	12.447	6.368	26.463	8.968	56.329	29.975	16.954	9.388
22:00	14.011	54.728	24.825	24.033	21.067	44.038	4.963	18.306
0:00	23.569	50.892	23.622	12.498	39.923	49.912	15.498	19.67
2:00	20.151	0.196	7.826	7.269	6.188	4.091	20.226	2.479
4:00	2.532	1.019	3.391	7.683	10.981	0	0	1.652
6:00	4.961	3.959	7.483	4.658	13.69	4.131	6.352	13.368
8:00	8.366	14.233	5.331	5.727	7.482	8.515	4.809	0.524
10:00	7.201	18.333	8.604	5.567	1.912	0.12	14.659	0.38
12:00	5.807	0.057	8.725	3.981	11.568	0.49	6.539	0.151
14:00	14.338	9.187	2.829	18.748	32.339	26.297	15.306	47.394
16:00	45.497	47.874	17.666	23.645	44.083	15.925	28.255	19.8
18:00	47.64	48.463	10.59	20.111	6.947	10.197	20.718	25.601
20:00	32.13	11.475	7.104	6.731	24.341	24.868	26.766	18.024
22:00	37.025	27.269	18.44	7.092	51.369	33.589	4.519	30.373
0:00	14.986	13.163	16.447	2.738	41.9	34.97	8.118	22.844
2:00	7.455	6.564	3.493	3.829	9.172	0.887	0	0
4:00	1.77	0	3.324	2.689	16.128	1.175	8.242	5.035
6:00	0	0	5.344	4.101	0	0	8.631	3.723
8:00	6.044	0	1.612	3.603	4.352	0.791	8.825	18.717
10:00	12.486	0.858	15.129	2.847	3.4	2.393	10.806	0.11
12:00	8.081	0	0.046	2.749	0.055	0	7.211	2.826
F
	Rearing (sec)			Climbing (sec)
	WT	KO-B		WT	KO-B
1	3315.29	4696.66	1	21846.2	10832
2	2981.71	4550	2	16918.8	4226.05
3	1860.93	7222.93	3	15261.7	1020.9
4	2028.2	3245.48	4	18070.5	17366.3
5	2349.1	8206.69	5	22246.4	2362.67
6	3516.31	7578.73	6	30342.1	4155.26
7	4122.14	3073.79	7	11948.9	14538.4
8	3632.79	5801.61	8	9041.51	5561.58
9	7967.48		9	5081.13
10	2828.1		10	11868.9
11	2112.97		11	17686.7
12	6353.56		12	665.99
13	5378.61		13	19956.8

## Sheet: Fig4
A
	Long term depression (LTD) with DCS bath application, fEPSP slope (% of baseline)												fEPSP slope last 5 min (% of baseline)
	WT-V												WT-V	WT-D	HT-V	HT-D
	1	2	3	4	5	6	7	8	9	10	11	1	84.9185	85.4228	100.624	85.7374
-20	99.3289	101.595	100.955	97.9066	104.395	96.2475	112.366	102.569	100.985	99.9064	101.57	2	63.6648	79.6787	92.334	76.082
-19	102.287	103.285	101.143	104.888	104.146	102.778	96.5746	98.49	100.877	98.2512	103.246	3	68.6001	78.6941	83.6817	69.485
-18	101.005	102.414	100.955	102.965	102.86	89.1894	104.119	98.6258	100.853	97.8442	97.7966	4	66.767	80.6012	86.2404	90.0708
-17	98.176	100.323	104.027	102.126	106.883	103.647	109.775	101.979	96.093	97.0302	102.552	5	57.9043	59.7985	102.757	58.9377
-16	91.8554	103.473	99.3881	98.0447	100.001	102.54	100.148	103.611	94.2808	100.476	95.9952	6	73.5546	73.3659	81.8952	72.785
-15	92.5781	107.843	102.679	101.926	101.884	105.828	107.989	102.5	100.542	98.0341	102.689	7	69.7591	68.3601	88.441	59.7501
-14	100.871	95.1331	102.115	104.785	105.015	101.654	103.814	94.6446	98.1504	100.476	98.3259	8	60.3677	77.1714	88.528	75.9977
-13	98.8664	101.847	101.582	98.3206	99.0026	97.5444	96.9636	103.119	94.7293	99.9606	106.547	9	72.2708	71.8695	87.4749	76.6561
-12	98.4715	94.3753	96.5672	104.315	95.7275	93.4025	100.11	104.661	103.963	103.108	103.909	10	74.1951	59.8312		73.5
-11	105.563	95.0987	100.266	96.8631	97.5503	89.3231	91.3164	101.623	104.765	102.81	96.5245	11	67.2441	71.5213
-10	101.777	94.2922	97.3195	99.0161	97.0362	87.584	99.8886	99.4466	100.555	100.883	101.46	12		62.3793
-9	97.4115	99.1589	102.616	101.819	98.2463	96.0901	98.6019	98.4335	96.4759	102.186	102.646
-8	97.4596	99.5385	103.619	98.1265	102.663	101.814	99.7587	100.272	102.445	100.205	99.5813
-7	103.665	99.6781	101.652	101.487	106.058	96.9749	94.2878	102.298	103.354	101.752	99.7431
-6	109.225	97.8131	96.0973	97.753	95.3723	109.528	98.6108	102.542	105.087	100.259	104.363
-5	97.4022	107.068	99.0356	104.008	101.385	108.026	95.084	97.6268	102.289	97.5729	100.845
-4	105.553	104.035	98.087	101.062	97.3387	108.041	93.2414	100.628	101.116	98.9567	95.0394
-3	98.1892	96.6801	100.705	97.85	101.839	104.374	91.8345	95.5635	99.0487	101.1	97.5322
-2	99.5794	100.279	96.5825	90.5059	102.557	103.189	104.424	96.6657	99.9932	100.015	91.7268
-1	100.736	96.0702	94.6079	96.2337	80.0413	102.225	101.091	94.7005	94.3957	99.1738	97.9079
0
16	43.7982	26.8539	42.9346	40.1921	26.9375	52.3612	54.9895	37.2387	46.1204	45.9917	54.6732
17	44.6074	30.9023	53.322	46.8811	19.9139	59.4752	59.1091	45.31	44.9665	50.0076	58.8056
18	57.2329	35.9083	53.1968	52.5087	25.7603	56.6609	58.0629	53.8082	51.0961	55.7602	64.3037
19	58.463	39.7764	60.4607	58.3818	34.5034	59.4905	73.6898	60.2663	59.2059	62.1368	64.6111
20	64.0482	42.8033	64.943	64.2891	40.8613	67.4908	71.0975	64.0606	67.8416	67.0482	65.6271
21	67.4139	44.7075	63.4381	65.6189	53.0483	68.107	70.0236	65.6786	62.6266	67.9435	71.7484
22	75.4728	45.9596	66.8076	65.0304	56.6359	75.0798	74.2452	67.9298	65.7783	68.7304	77.8954
23	72.3894	49.0996	70.4903	70.5285	60.5436	77.6247	69.9035	71.438	73.0326	74.578	79.364
24	83.3348	49.913	71.9323	71.2035	59.0811	78.1301	75.7267	74.9836	70.5985	73.8113	72.2607
25	79.4419	50.9152	79.4545	74.6763	62.0941	80.2019	76.2078	73.8768	67.0043	78.7565	76.3586
26	85.7915	49.0997	73.5929	71.1116	59.8273	81.0869	74.3192	78.1166	67.71	73.6414	76.5635
27	83.0229	50.712	78.8899	74.0728	62.3588	74.6204	65.1546	74.6834	69.6895	75.7038	79.1593
28	89.511	53.4498	77.8242	77.6376	57.7703	76.0431	59.7577	75.1337	71.5135	76.0837	71.5094
29	89.4463	56.2312	79.7988	72.9476	65.3235	73.6796	77.7356	77.9477	73.4632	74.8084	69.836
30	88.0171	55.8827	75.8183	75.0599	59.2804	77.8694	74.0418	76.3156	78.415	75.7581	77.588
31	90.7928	50.9515	72.4333	74.9525	59.5349	81.1972	65.525	77.1647	72.5664	77.3047	75.607
32	91.8231	55.2943	73.781	75.4946	61.083	81.4506	70.4867	78.0039	78.1641	76.5723	75.9826
33	92.8833	53.8056	71.3364	78.4462	61.34	71.3319	60.4521	80.3302	80.2808	75.9885	78.0662
34	89.2801	56.0061	73.4989	72.4873	59.787	66.288	76.2726	76.0155	76.0706	80.3032	75.3683
35	92.7581	55.8753	72.5273	72.0321	53.3331	70.2254	77.7537	76.8033	79.5392	81.2664	74.2756
36	89.1063	52.6727	71.0855	77.0037	55.3325	74.6205	71.727	77.4833	78.7258	81.3889	75.2658
37	96.1789	53.4862	71.783	73.725	58.6905	73.6242	65.8582	78.3416	77.3385	76.1922	73.7974
38	99.4737	54.9313	78.7018	72.2316	62.8124	71.5846	70.8015	80.2366	77.3624	78.0105	77.8271
39	96.3909	52.1571	71.6811	74.7735	56.9004	73.8297	77.7352	75.6404	78.5824	76.6944	72.4571
40	94.9741	55.0547	78.5138	71.9912	64.8544	77.4661	65.7471	77.61	71.5076	77.0878	72.9181
41	95.0511	55.4033	73.5303	73.2903	61.4207	69.0867	75.6522	71.3069	71.1069	76.0296	71.5435
42	91.8234	56.2749	74.4471	72.9581	60.1275	74.0198	68.3112	77.1594	79.4678	78.3901	79.0743
43	84.5808	54.2921	79.4854	72.5336	54.4171	77.1812	80.3367	76.0627	75.8373	78.5532	70.5874
44	87.1981	54.9676	74.3765	70.9174	63.7578	78.9201	74.0969	78.135	70.5148	78.6885	76.9733
45	90.6868	53.9581	76.6959	76.0631	60.1401	77.8925	78.9108	76.4796	75.7597	74.9983	67.3431
46	89.6069	58.1556	73.3735	70.048	60.1906	77.1188	65.6916	77.3474	72.4229	74.5642	70.1774
47	91.4284	58.2864	72.9661	68.5648	69.3167	73.1503	64.7932	77.1877	72.9368	78.7431	66.1479
48	86.0419	55.5268	70.0749	68.0738	65.6865	66.5256	77.4577	74.1016	70.3653	76.3821	74.5312
49	93.6733	56.9211	70.8898	69.8331	63.6445	70.1695	73.8937	75.4901	70.9036	76.7078	69.034
50	87.6513	56.3982	73.7809	66.6316	67.7663	73.8609	73.7639	70.7814	74.2047	80.059	68.3335
51	88.8362	56.3691	73.9687	68.9384	65.2705	79.6316	65.5771	70.2934	70.7601	76.0022	70.4166
52	84.3752	57.0592	76.8839	69.4344	57.9342	73.2846	73.8006	73.4641	71.5255	77.332	73.2848
53	88.0653	62.3605	65.4594	68.2426	59.4468	69.1899	74.5412	70.8189	72.0043	77.4541	71.0477
54	101.854	55.8535	64.0647	67.2913	59.8503	74.8093	73.5601	73.1263	75.6284	77.1421	67.1209
55	86.4182	61.7286	63.908	66.9744	61.4006	83.6473	64.4974	68.8634	73.3675	76.5178	64.9353
56	99.5225	59.5283	64.4331	67.6853	62.6889	82.9677	67.8764	65.3597	68.8164	71.9523	69.0848
57	86.0167	56.5274	65.3264	68.1868	59.3712	71.3316	79.0686	67.4046	72.6259	76.8845	68.5724
58	82.0149	59.0126	67.5595	68.6364	58.3098	77.1499	72.3291	68.9804	69.0802	79.041	61.8792
59	85.6185	60.2398	70.5526	71.7463	58.2064	71.8062	77.5408	66.1664	72.8651	73.6145	63.3477
60	91.6785	61.2276	70.2393	72.0329	56.5853	73.7351	75.9485	66.5228	71.8365	77.7119	64.7819
61	91.1686	64.7135	66.4782	71.9355	54.0893	74.051	61.8312	65.9601	73.4038	76.9114	67.309
62	89.8867	67.4804	67.011	70.2736	56.6987	71.2055	59.7914	65.416	74.1444	76.6265	66.4548
63	89.7033	68.2574	70.6153	71.992	54.7121	79.0142	63.6021	68.0987	70.3055	78.2001	67.5478
64	91.9197	67.0809	66.9796	71.0609	55.4509	69.4271	69.3571	63.5775	70.6644	73.6416	63.8258
65	89.9415	66.6234	64.7543	73.3219	55.3249	69.7665	65.7469	65.9225	69.6836	76.4364	68.129
66	80.9352	63.0722	66.5174	72.3602	50.4842	69.6716	64.4787	65.5848	67.5309	76.6264	67.5139
67	86.9866	66.8268	78.7646	71.4396	54.4298	70.1223	68.6448	62.3581	69.3251	76.9791	64.2014
68	99.3203	63.3046	73.9064	68.2481	51.876	71.7428	68.8204	62.3769	67.6743	76.3279	60.2058
69	88.1331	60.3417	69.4871	67.0411	56.9735	75.2995	65.4325	59.1269	66.8967	75.7852	65.6694
70	88.8364	61.8158	67.5277	67.4041	55.2113	68.5488	71.283	65.1721	74.3722	71.1996	67.5818
71	86.0491	60.8354	73.9852	71.399	56.1341	71.5534	67.58	63.7934	72.1235	73.913	63.211
72	83.364	60.9007	67.6693	70.3962	56.0055	79.1253	66.4782	64.4123	69.457	74.0486	64.8335
73	83.3544	63.399	68.2333	66.2433	58.7786	71.3953	66.4505	60.1537	73.822	72.2578	71.3557
74	86.8709	65.89	66.3214	64.0952	56.9255	69.2451	78.1704	57.9213	70.8859	75.4596	68.6067
75	84.954	67.2989	66.7915	61.7014	61.6779	76.4539	70.1162	55.5576	75.0659	75.2968	68.2136
	WT-D
	1	2	3	4	5	6	7	8	9	10	11	12
-20	104.899	98.3564	100.764	99.4361	104.99	98.8346	99.9472	109.342	100.245	106.768	103.327	94.95
-19	98.5698	100.884	98.8107	96.8778	102.421	112.894	100.937	109.701	99.2967	103.086	102.735	97.4455
-18	95.1089	102.514	99.9232	100.288	104.171	93.0581	104.071	102.2	97.1671	102.91	101.311	99.4532
-17	102.592	100.682	100.844	100.716	103.748	109.431	104.677	100.475	97.5829	104.608	96.7642	99.1771
-16	103.779	98.532	102.701	99.5787	95.6158	100.749	99.1224	91.7098	97.6797	97.2844	89.232	97.2066
-15	99.5593	95.9092	100.36	97.091	104.294	106.555	105.611	105.992	103.75	100.491	94.9912	106.863
-14	96.0931	96.6933	100.328	100.929	95.964	98.4939	99.7833	109.366	102.83	96.3063	94.2634	103.421
-13	99.295	97.2882	102.701	102.209	97.6205	97.7069	97.0339	103.054	103.033	102.135	104.297	101.213
-12	100.03	99.0054	99.055	99.0101	104.633	90.3332	96.7591	103.898	105.415	97.0402	105.888	101.386
-11	96.5547	100.452	99.0872	105.833	102.975	98.1878	107.646	96.6024	101.03	104.771	104.584	101.018
-10	98.372	95.8551	98.4961	98.5125	94.6841	94.9964	96.2092	106	98.4736	103.154	108.313	100.585
-9	104.174	106.36	97.2136	99.2944	102.995	105.532	93.6248	92.3601	103.479	95.8713	101.69	99.0851
-8	103.713	99.9381	97.4484	100.076	95.0794	93.1604	97.6936	84.361	97.2056	95.1104	89.8988	102.571
-7	102.196	100.127	97.1178	101	103.795	101.44	99.398	93.3596	99.6745	94.7028	98.674	97.6833
-6	100.086	99.938	99.1514	99.5077	96.9147	108.592	102.367	101.272	99.6844	95.8171	106.509	98.0733
-5	100.877	101.317	100.429	99.1522	99.6815	92.9125	97.0889	108.092	98.7349	89.9745	102.584	98.9176
-4	99.6248	102.453	100.408	100.005	89.6209	95.2148	100.772	91.2507	104.592	96.0889	97.3252	98.6362
-3	100.416	100.263	100.365	102.066	100.783	100.286	98.8476	92.1613	98.0572	104.065	97.0829	102.252
-2	98.7212	105.333	102.824	97.8419	101.884	100.505	98.1334	99.1148	98.6771	104.146	99.8561	97.9651
-1	95.3394	98.0993	101.972	100.574	98.129	101.117	100.278	99.6876	93.3908	105.668	100.674	102.1
0
16	45.2305	40.3003	49.7938	45.3207	40.7072	51.6729	53.7137	37.9408	39.8457	53.6153	54.936	34.7205
17	52.2008	46.6368	51.1031	58.6976	50.8441	68.9761	63.7201	62.6932	50.4898	62.3242	58.9819	43.5066
18	61.7329	50.8278	59.2894	61.8962	54.5037	68.8534	53.5487	65.6623	56.1678	68.5333	70.5444	54.2594
19	63.56	57.9457	63.8349	68.1714	58.4725	75.4109	68.4478	72.0929	64.0479	71.0473	70.6204	60.0776
20	67.4407	63.4888	67.5714	71.3507	62.4117	73.5957	71.3616	67.4214	63.5352	75.7623	68.3174	63.785
21	68.9854	64.6785	70.9195	72.3555	70.2708	69.9468	78.0686	73.3351	70.244	81.7137	77.6517	64.3353
22	70.4359	66.4361	72.6545	75.1782	68.9531	74.7	78.2885	82.8688	68.5594	85.3145	72.7118	68.196
23	73.3181	68.8426	76.6732	77.1184	69.7107	71.302	78.0681	84.3337	74.1312	84.2683	86.3507	69.91
24	79.2899	73.169	78.6958	78.3872	70.7273	84.7314	76.9141	66.8563	78.1242	84.9747	65.8145	69.6573
25	84.5176	72.9391	79.6539	80.6617	70.1434	76.2856	77.9036	87.9084	75.6068	73.6025	73.6833	71.7412
26	84.0559	76.2244	81.1442	86.0025	71.0846	84.2156	81.7525	85.4726	78.5215	73.1135	73.1373	76.4228
27	83.9052	73.4665	79.2815	83.0177	71.0094	88.9632	78.8936	85.7987	79.1693	74.7306	86.2457	75.6651
28	85.591	80.4968	83.8322	81.5962	68.3313	86.8125	75.3205	80.3972	75.065	78.1546	74.3114	75.4486
29	84.1778	79.2799	82.7676	80.6719	76.916	83.9972	72.6261	74.0167	78.3862	75.8042	72.8341	77.2617
30	86.26	81.4431	84.6415	78.5193	75.4707	84.9327	71.9114	86.0932	78.5985	67.7397	72.4019	74.3391
31	86.0054	78.1306	87.3185	79.8286	76.8875	80.7448	73.6707	79.0332	78.7343	73.2362	70.3257	72.3906
32	85.5248	80.5779	84.6572	80.0326	79.2311	76.0959	79.2789	75.0542	79.0926	70.2196	77.6834	79.4537
33	88.5109	83.4443	84.737	82.5503	76.9814	81.9687	76.9698	88.4655	82.8105	72.8284	74.3951	75.5298
34	86.3919	84.742	87.1589	83.4442	78.0307	77.2475	70.207	78.397	77.9495	74.3773	79.9107	75.2216
35	84.3756	81.5378	83.433	84.4393	72.2562	80.5873	69.9556	75.1494	76.6914	69.5946	75.5315	71.2719
36	84.1687	84.823	84.391	83.3731	74.7268	72.0596	72.2421	73.9582	79.49	70.1652	68.4016	71.9305
37	86.2597	84.5526	84.4975	86.2162	79.9041	88.3773	68.5027	84.573	80.3032	67.2169	77.0178	73.5112
38	85.0915	84.12	85.8548	84.155	72.2421	80.9982	68.6131	87.7249	82.4907	68.7793	66.4391	72.8455
39	85.1194	84.5256	83.2733	84.6525	74.9059	76.0671	67.8437	76.4075	78.8982	71.4697	61.8162	70.4692
40	84.592	81.6053	83.8588	84.7947	71.5503	77.3931	68.998	78.9858	73.962	67.5289	74.5016	73.1213
41	84.5261	82.6937	82.3152	81.5963	74.4025	80.6136	63.7196	79.9412	78.5496	69.5469	71.1674	69.4138
42	85.8448	83.7278	84.5616	82.6625	70.6798	90.4058	65.7065	83.666	77.7565	68.1266	70.1524	72.7424
43	87.8228	85.0122	84.258	82.2762	74.9668	74.4496	70.6473	85.3689	82.026	68.9147	77.0625	71.1187
44	83.603	82.4165	83.1934	82.1949	73.6774	77.7866	61.4422	81.0311	77.776	70.1919	68.8485	69.6303
45	86.0616	83.7281	84.737	76.8032	78.8356	82.4059	69.8307	70.2308	78.918	67.9907	72.3417	70.0092
46	90.8842	85.9857	83.6038	80.8845	73.828	87.2583	64.0495	82.4721	81.1842	66.1428	93.0335	72.5749
47	80.4478	87.4595	86.0946	80.8342	71.1174	76.242	70.0979	72.5976	77.3215	68.772	75.7735	69.5115
48	82.2472	88.3381	84.7	87.9414	69.6021	87.4506	65.9192	79.1212	80.0898	67.3114	72.7134	70.0362
49	82.6708	84.6404	84.8967	84.8857	75.2398	81.3217	61.5832	84.4219	75.6266	65.0559	64.1352	68.1149
50	79.2048	86.1211	83.1405	84.3683	75.2209	80.4825	72.9019	80.0836	76.6434	64.92	75.2657	69.0349
51	82.181	84.2823	84.5722	81.6361	74.901	83.1054	67.3482	81.9775	73.6807	61.7406	83.5937	68.2772
52	84.8557	85.5668	83.5455	81.1693	75.2963	80.2202	72.5723	76.9481	77.186	65.9252	80.2743	65.9282
53	86.57	83.2818	85.7699	84.3461	76.5199	76.8305	68.3932	81.9777	72.0448	65.925	81.1529	65.8958
54	84.6579	87.7974	75.0233	80.0326	76.4069	79.6168	74.6608	85.6395	79.6255	62.8001	72.5309	66.2205
55	88.0774	86.2561	75.4811	80.6516	74.2893	84.3032	71.8568	83.1242	77.3691	63.9688	76.4411	65.3223
56	83.9522	85.8505	70.973	80.1037	73.2821	80.0161	71.472	78.4204	79.8288	66.8082	83.8049	68.1257
57	89.0095	84.8162	70.5736	80.2458	73.4515	72.0159	73.1764	77.8713	83.1969	60.9118	74.9858	69.0891
58	84.8467	85.1475	69.11	82.0228	73.4515	81.8461	64.3244	72.3318	77.9209	68.9007	77.1529	68.4829
59	86.8249	86.6213	72.7931	84.2261	73.2256	80.0454	70.2071	74.0196	79.5186	64.9197	83.3205	64.1638
60	89.1414	88.2029	74.4376	80.8242	68.2468	80.5699	71.8014	66.8903	74.9204	63.8872	75.3033	65.2192
61	85.9301	88.6896	74.4539	79.2508	64.5149	83.3152	76.8599	77.5371	78.0956	63.8327	71.0148	65.7156
62	87.5219	84.5122	74.8424	87.424	64.4961	79.031	72.7361	79.0575	73.6371	63.0718	69.0986	65.4991
63	83.3302	82.0651	78.8555	79.2507	69.2165	73.9104	74.7702	78.0615	74.804	61.0066	72.0608	61.5841
64	83.3392	81.7405	76.9025	83.0275	66.2466	78.1655	73.8906	77.8861	74.7552	63.4522	71.1364	66.8973
65	82.7935	78.1173	76.9027	81.4435	65.2819	88.5871	72.846	79.1923	75.6262	59.1928	69.53	64.0014
66	85.4212	81.7405	76.8916	79.4331	70.2519	82.8429	75.8148	90.4462	73.0224	61.9171	75.1974	69.8468
67	80.7022	81.2538	80.8357	83.8707	62.0489	84.7839	78.0144	88.728	68.0953	66.1155	73.046	64.4255
68	83.2734	77.7386	80.7716	78.54	59.6443	80.4823	74.2755	73.8046	69.3247	59.7228	72.0156	63.7759
69	84.63	79.7667	80.9047	84.3682	67.409	80.663	76.475	78.3561	76.5272	64.8381	73.5461	67.1732
70	85.0535	73.7165	79.8138	80.2458	63.8324	76.1546	73.8361	76.6611	73.9332	63.0108	75.6371	63.9203
71	89.4051	77.6439	78.6699	82.0227	62.1057	73.7063	67.788	70.2729	70.6117	59.2402	68.894	63.9906
72	84.1964	80.3615	78.6909	81.8095	54.1757	69.5532	68.6127	77.3467	71.9523	61.1016	75.6824	65.3187
73	82.4821	82.6869	78.8022	81.6673	60.4205	72.9195	65.3694	81.2144	72.7134	61.387	76.3193	59.5634
74	85.7791	78.9824	79.2125	80.9565	62.4018	74.9741	67.2386	82.5189	72.3541	59.6546	63.6199	62.4863
75	85.2514	78.7188	78.095	76.5498	59.8887	75.6763	72.7919	74.5043	71.7159	57.7727	73.091	60.5377
	HT-V
	1	2	3	4	5	6	7	8	9
-20	109.934	98.0652	89.0819	100.166	101.858	98.6621	100.982	100.936	99.145
-19	99.1899	104.743	99.229	99.0451	99.9559	105.088	101.614	97.6117	99.7594
-18	98.4338	99.5452	92.0938	95.9463	97.8949	104.648	102.053	105.532	99.5603
-17	97.9361	99.798	94.5928	101.054	98.0796	107.367	103.053	96.4269	98.0635
-16	104.287	100.382	95.0584	95.1317	101.594	101.957	99.3799	98.3923	100.815
-15	96.9401	98.2404	101.043	100.431	100.379	106.296	95.0437	102.034	102.078
-14	97.838	102.543	100.199	103.571	98.2384	100.914	102.91	99.7936	101.447
-13	100.373	101.725	95.2874	102.398	97.3133	99.733	100.165	97.6988	101.637
-12	98.2651	101.375	101.934	100.61	104.342	101.792	97.1352	104.896	100.365
-11	99.2525	95.3785	99.7107	99.1829	104.805	99.8428	97.8085	100.387	98.7298
-10	97.2957	98.4743	99.2692	103.423	96.8115	95.8063	99.3382	102.135	101.646
-9	91.7369	101.609	105.561	96.2847	98.582	97.5362	104.91	104.043	98.1932
-8	103.753	98.3962	101.13	101.35	94.6185	94.5157	102.389	95.0394	97.5791
-7	97.9986	99.6811	104.662	103.645	100.405	95.5043	105.409	98.4072	97.7608
-6	86.4891	97.9289	107.484	98.9815	96.3222	99.3486	98.2472	94.577	98.1846
-5	102.25	103.166	105.143	100.399	102.65	96.6577	103.696	103.132	101.213
-4	104.011	99.6811	98.977	101.932	99.995	100.392	101.695	104.678	99.8807
-3	104.856	99.0386	104.165	100.536	100.986	93.8842	93.2684	100.849	101.698
-2	105.736	99.9443	107.389	100.61	102.255	100.24	96.196	95.6175	101.395
-1	103.424	100.285	97.9915	95.3013	102.915	99.8148	94.707	97.8143	100.85
0
16	47.6302	48.886	49.0748	34.6267	69.478	52.9013	48.1545	39.4311	44.2338
17	50.1823	61.5848	50.7068	40.8028	77.7746	56.9168	56.6932	48.1769	54.9551
18	61.0514	69.3869	56.691	49.2216	78.937	67.1386	63.5591	55.526	59.0647
19	62.6939	62.4707	60.1288	56.1173	88.8585	68.7312	63.4573	54.6732	65.7784
20	64.2917	63.6143	69.8192	59.9353	87.3524	76.6945	67.4362	65.3902	73.0467
21	68.5315	73.8989	69.2589	61.6165	92.7162	79.1933	70.0077	61.4587	76.8626
22	75.5578	71.7621	66.5076	60.8765	95.332	76.6942	69.977	76.4819	78.3768
23	72.8809	76.5319	65.5375	61.4899	90.5892	79.1375	75.6392	75.5715	83.8281
24	78.591	79.2381	71.1357	66.6935	99.8102	84.7256	76.1291	73.4474	83.1618
25	79.2429	78.2062	74.66	60.7388	102.373	83.737	78.7714	79.7486	86.6748
26	79.4272	78.1478	74.1712	63.3933	98.7659	86.7846	77.5574	78.8806	89.4004
27	81.384	85.8915	72.8939	64.6895	101.158	83.0368	75.8434	82.8699	90.3696
28	96.0327	84.6847	71.6639	62.1454	98.5688	90.5328	75.272	79.0261	90.4132
29	82.3861	86.8309	75.0069	68.3645	104.315	77.4082	75.4864	78.6218	94.3065
30	82.8424	89.2455	79.0992	65.1388	104.276	83.8334	81.9137	83.9976	97.4561
31	84.1497	89.7809	80.6366	66.8099	101.33	80.2366	82.0566	90.0248	96.063
32	87.9659	87.4149	78.492	66.3233	104.342	87.2792	82.2708	85.184	98.2436
33	93.1777	83.2097	72.9019	66.9579	109.93	89.4756	80.414	89.2298	99.031
34	89.5491	90.2092	68.3444	80.9501	109.322	87.2651	79.7713	83.3911	90.3534
35	93.0949	88.2132	67.1144	84.2817	106.416	86.6339	82.2708	86.8879	91.798
36	79.9432	92.2237	74.6839	82.5253	104.131	85.1927	81.9137	83.3771	92.5161
37	100.889	87.8773	74.8572	82.0922	101.991	81.9665	82.6279	78.5929	94.039
38	97.2515	91.7088	73.5878	89.5375	102.044	89.0644	84.4133	92.712	94.2377
39	99.2439	94.4539	70.5915	85.1907	107.711	87.2381	83.9134	91.9764	91.2617
40	105.257	93.7229	67.8714	88.9771	104.487	91.6588	81.0568	88.1171	92.9056
41	102.055	90.491	71.5299	89.1571	110.934	87.2521	86.9128	86.5277	99.6973
42	100.222	89.5765	63.4244	98.6852	104.528	81.2385	88.6269	88.0308	92.0835
43	101.582	93.5282	66.4442	97.8404	103.603	89.6679	87.0557	92.7563	90.9072
44	107.338	88.6415	71.4904	95.0477	104.792	87.4574	88.7697	88.5227	97.7334
45	100.913	90.3937	68.3603	86.788	112.07	83.2156	86.413	85.2269	90.3789
46	102.713	97.1309	72.3816	87.2957	105.003	85.5493	86.2701	85.3864	92.5417
47	110.158	88.9531	73.4538	87.4861	105.98	81.403	90.4122	82.7624	99.5155
48	100.285	91.417	68.2816	90.0774	100.828	81.6096	87.6269	88.1179	94.6097
49	106.706	94.8428	73.8953	90.1937	100.274	85.3575	89.7695	89.3311	98.183
50	95.037	91.4847	71.1515	85.1382	96.918	86.8808	89.6267	86.5123	86.5808
51	101.545	89.6152	64.1026	90.2572	99.8245	85.0553	89.5548	80.3848	92.2736
52	98.5207	89.3234	62.628	90.659	101.568	78.8636	85.9129	87.8141	91.8582
53	99.8837	93.7333	68.0607	87.3168	104.038	88.9952	86.27	83.2469	90.2578
54	111.127	89.7127	64.8989	88.4379	102.044	83.8059	87.5555	78.3046	95.7433
55	100.542	93.645	65.025	86.1643	108.292	83.243	86.5965	87.4098	93.6666
56	100.649	95.2906	66.3102	86.3229	105.294	87.5679	87.6983	80.5295	92.2129
57	97.4353	91.8928	68.991	94.9111	101.912	88.158	88.2697	84.8647	93.4586
58	102.339	90.3652	66.6098	86.8199	107.856	83.6965	85.3518	89.1422	94.0036
59	94.3072	94.5026	57.716	84.9478	104.633	81.994	90.1266	96.9166	88.8297
60	106.021	96.4003	70.4969	90.8915	103.735	76.8041	88.9125	85.6024	89.2277
61	100.249	99.5548	73.1463	92.2774	106.879	87.4992	88.4022	83.622	86.6668
62	98.3546	95.5539	81.5591	88.7025	107.091	85.5909	83.1275	80.7025	93.0952
63	93.391	95.7289	81.9377	86.6402	105.558	81.4448	87.627	84.9524	89.6517
64	101.263	93.5384	80.8577	80.0564	105.294	81.541	85.9844	81.3673	91.3992
65	102.813	97.8804	86.2505	85.3499	104.831	79.0972	86.4844	86.4265	93.4585
66	109.116	94.5408	87.7724	85.4239	104.989	83.2161	88.1269	86.7296	95.3362
67	98.8171	94.1911	82.5712	95.0591	103.603	78.8362	86.1987	83.8396	91.4516
68	95.4637	95.6026	85.9903	90.8496	100.908	77.5046	84.0562	82.712	83.0756
69	98.2123	91.8646	86.1559	84.9055	104.713	83.6145	88.6268	87.1926	80.7313
70	94.7788	89.0608	86.1638	87.4861	101.304	81.5956	88.0555	86.889	89.1329
71	105.754	95.6712	83.9088	90.7436	102.784	84.2316	87.9123	88.0597	85.5419
72	100.756	91.1739	82.4107	83.7317	105.28	82.4197	88.7693	86.4993	79.9612
73	108.989	94.9898	81.0547	84.9691	101.436	80.9781	85.4844	88.5507	91.3736
74	87.3875	90.8809	84.366	86.175	103.298	80.9781	91.0549	90.2421	92.974
75	100.234	88.9539	86.6685	85.5828	100.987	80.8682	88.9839	89.2881	87.5235
	HT-D
	1	2	3	4	5	6	7	8	9	10
-20	96.9058	101.932	101.636	105.922	98.8265	96.1785	99.89	99.8165	103.851	108.706
-19	95.6849	99.2219	99.1313	100.937	97.8203	97.2947	102.271	101.766	102.365	113.154
-18	103.91	99.7203	103.472	93.7175	96.3422	106.779	111.516	98.8097	102.22	98.7185
-17	100.373	98.4266	100.92	96.0211	98.2322	106.515	118.556	101.127	98.9571	97.0747
-16	101.106	98.4769	99.3072	101.464	98.9489	97.5585	102.495	102.382	101.812	108.662
-15	103.045	95.3306	101.233	100.945	97.6529	106.076	96.0942	99.9764	99.8602	106.469
-14	98.2103	103.227	98.2582	106.906	100.428	97.1444	97.9721	101.814	101.404	78.3481
-13	98.859	98.0919	98.0261	97.4034	102.989	96.6426	103.813	99.8644	101.229	103.546
-12	94.1079	99.6586	102.163	100.669	105.58	98.4365	94.6158	100.8	98.5785	96.0851
-11	92.9917	97.4324	88.0384	101.498	104.742	98.022	95.9743	101.255	96.0877	97.8449
-10	99.41	101.25	96.6738	99.7358	96.0833	104.144	95.4549	99.1294	99.4232	95.3391
-9	95.7895	100.094	102.685	100.03	101.068	101.422	94.2962	96.8441	101.579	91.6698
-8	110.9	101.013	99.7342	104.66	98.6895	94.5222	94.9754	97.7549	103.269	96.6479
-7	107.803	102.618	105.664	100.151	105.976	100.718	98.5071	98.4102	101.317	95.1409
-6	100.261	100.404	100.683	94.5009	92.7296	105.286	96.3738	99.8006	93.8884	101.779
-5	102.849	103.5	95.5114	97.5329	100.58	103.705	102.487	101.99	96.9762	99.5563
-4	92.7895	99.2234	99.093	97.1873	108.263	98.8123	109.223	101.846	99.8601	105.449
-3	99.2635	99.8818	99.5156	96.9714	100.885	96.467	98.1719	98.099	97.0636	95.5364
-2	97.6589	100.28	104.345	104.66	97.0436	97.3828	95.6147	100.408	101.288	102.312
-1	108.082	100.217	103.909	99.0879	97.1197	96.8935	91.699	98.1071	98.9716	107.96
0
16	55.7298	53.3159	26.2	43.3155	35.7779	57.6924	48.8927	45.0018	45.8011	57.064
17	64.7997	61.2486	32.1879	48.5796	44.671	60.1253	58.8493	53.5753	48.5031	65.0878
18	63.1809	63.4368	40.766	58.9865	47.0127	65.3306	70.3858	59.7039	62.5437	77.2685
19	73.5064	67.9379	42.503	63.0497	56.1896	69.897	61.7847	60.8871	62.7768	75.7149
20	79.0108	76.0688	46.5075	66.4763	62.2047	69.0565	66.5261	66.7437	72.4774	80.3738
21	74.3642	70.649	51.3563	72.034	55.9151	74.6639	69.5225	67.9183	74.3273	76.5065
22	81.7947	80.0232	56.9931	69.4853	65.2599	73.109	53.8869	71.0105	72.783	82.2617
23	84.599	80.4707	59.5173	70.9253	65.8541	78.7656	68.6839	70.8675	80.0222	79.7645
24	85.2897	72.7379	64.3286	77.6636	69.662	77.8878	76.355	72.7045	77.8373	72.9883
25	84.9403	80.3971	65.2159	68.2468	69.7417	75.4925	71.6329	70.0601	80.2187	82.7328
26	87.6196	85.7183	67.4884	78.4552	71.4336	77.3742	66.4252	69.0223	80.2989	79.9771
27	91.6734	78.8305	65.529	74.2081	76.2204	79.268	66.5345	68.5749	80.794	74.6786
28	90.8707	82.0135	68.1009	79.8233	78.1412	79.5571	74.1017	74.1759	82.0321	80.0371
29	100.744	84.5869	70.1361	80.0968	74.4673	82.6305	74.9807	78.4028	79.7162	74.4197
30	92.9707	83.5798	68.9502	80.975	70.0007	77.6879	71.5873	77.9873	83.2993	81.3326
31	95.6218	73.459	71.9296	82.2421	64.9213	77.2865	59.0281	83.4844	79.2647	88.7782
32	88.6379	81.4535	71.1752	82.398	70.9002	77.9136	74.2775	79.0346	82.236	82.4883
33	91.7638	80.8199	70.9807	83.221	68.1714	77.0481	64.1637	79.0344	79.4831	79.078
34	88.0243	75.0755	69.804	83.5379	68.3697	80.4352	70.2264	75.2064	80.8377	80.616
35	91.366	78.8368	68.0767	81.5938	70.1714	81.9024	67.0539	81.2714	80.7722	76.8406
36	83.3008	82.6596	69.5568	80.4997	69.8635	83.1322	68.676	89.6619	80.9178	78.485
37	84.417	78.731	74.3587	78.5703	68.644	80.159	78.4088	81.3274	79.6433	71.6189
38	87.7033	77.8109	74.7952	82.3141	76.754	77.6754	64.8086	91.6756	84.1223	85.9905
39	85.0802	81.1302	75.7871	79.3911	74.9246	80.6104	61.8519	78.5467	79.1626	79.992
40	92.936	79.4393	75.7441	82.2995	71.7537	77.8007	63.5301	84.6838	85.2511	73.1409
41	86.9635	77.9721	75.3078	83.9699	65.5221	76.7719	59.6009	79.3939	85.4332	81.5291
42	86.3496	76.1568	77.8697	76.1515	67.5464	80.6108	66.2012	82.3904	81.3838	75.1348
43	93.2152	77.8225	76.4845	80.0676	70.7752	81.0373	70.6496	85.0194	83.7945	77.2365
44	86.2101	80.2598	70.8626	81.7234	75.5191	75.6055	63.2903	76.8207	82.6584	73.9934
45	85.8473	81.7271	74.6009	80.9895	70.5799	78.9047	70.7376	88.0958	82.2506	74.2063
46	87.5356	79.6133	75.3838	90.1989	68.8879	74.6646	64.2492	80.6085	84.7559	69.2359
47	88.4568	84.2134	78.3822	87.348	69.5737	76.1325	63.1222	76.6052	79.5122	68.3755
48	86.3704	76.2936	74.2782	86.216	66.9367	76.1448	61.732	81.104	87.4651	73.7191
49	88.1987	72.7379	74.677	85.7264	71.1655	80.9243	57.0571	79.9295	79.5996	67.873
50	87.6262	76.679	77.5661	90.3912	65.8178	81.8397	51.9426	74.4875	82.7167	77.4493
51	90.0262	75.5231	79.6348	91.3652	68.8268	79.1422	65.3678	76.9567	82.4108	71.6636
52	90.8145	75.2247	77.7938	90.3338	68.1104	79.7446	65.6474	79.5938	79.1846	77.3274
53	86.1472	73.1109	79.6537	93.2999	71.7386	81.3252	65.7112	74.5914	86.9626	75.1425
54	88.4565	76.0946	75.9054	83.8143	72.7599	81.4003	53.7141	81.3676	82.8259	70.5677
55	80.6986	76.9898	76.9967	88.937	68.0495	76.044	49.2257	81.2159	78.1286	62.1863
56	86.1193	80.3838	73.9698	89.9915	66.8147	79.8701	60.565	73.7444	84.6903	68.7869
57	90.3547	78.1462	74.2448	82.631	69.9092	75.128	59.8141	79.0983	81.1582	71.9305
58	84.7798	77.9343	73.8273	93.1704	63.839	71.5534	72.0159	81.3436	80.2914	68.3294
59	93.9335	75.1003	76.4084	92.652	66.4641	74.0495	68.0366	70.3084	80.1679	81.834
60	87.6336	79.6374	68.997	88.4622	68.9031	79.9951	66.047	76.5171	81.4059	69.4413
61	78.5637	76.2438	71.322	90.8231	67.8666	74.2376	66.047	81.4235	78.3981	80.783
62	90.2777	76.3307	72.6555	87.6701	65.5952	77.6121	66.047	73.3207	79.6362	70.7651
63	86.2103	77.8966	74.8142	89.0236	57.0892	77.5742	63.0904	75.9977	78.7986	75.0284
64	82.7426	72.3645	72.8783	93.3548	67.3483	78.8534	61.6121	76.6609	79.3375	80.9968
65	87.6894	73.5457	74.0361	86.9503	64.1806	74.3252	64.2248	84.6437	77.8884	73.2928
66	87.6611	72.8987	74.017	89.0669	61.1745	73.5355	64.4645	74.3754	79.6801	75.851
67	84.9054	69.0326	74.7572	88.6926	64.7563	73.7234	58.6154	80.2886	78.6966	80.2508
68	85.5406	78.5438	69.9226	96.4704	62.2107	75.705	57.7764	86.6415	77.6262	76.9018
69	82.0101	72.6133	70.9854	95.5892	57.7842	73.999	58.8152	78.4268	76.337	83.1278
70	82.7775	73.0233	69.2723	89.0956	59.863	79.6437	59.3347	72.6818	77.1021	71.6489
71	92.1063	75.9574	69.8607	88.9374	61.0828	70.2611	59.3347	82.8618	75.6526	73.0644
72	81.3199	71.9669	72.4229	89.1963	58.095	74.5889	58.6155	69.7889	78.2307	78.3324
73	85.8612	76.6288	69.0636	88.2983	60.0614	67.7399	58.2559	80.5525	76.8177	73.9935
74	84.8084	76.741	66.0652	92.8248	58.2751	74.852	66.0867	76.8846	73.9265	73.8409
75	84.5914	79.1157	70.0125	91.0969	57.1743	76.4831	56.4579	69.9008	78.653	68.269
C
	NMDA/AMPA ratio DCS oral ad					Tau (ms) DCS oral ad
	WT-V	WT-D	HT-V	HT-D		WT-V	WT-D	HT-V	HT-D
1	0.345735	0.407834	0.189136	0.257256	1	133.018	137.18	78.8336	117.545
2	0.207971	0.277079	0.0396575	0.231784	2	118.454	105.131	142.304	154.944
3	0.267846	0.00781184	0.255435	0.309865	3	120.396	129.658	143.598	141.405
4	0.295283	0.195857	0.195656	0.316333	4	86.2361	149.994	102.316	82.3871
5	0.203951	0.256451	0.195242	0.30524	5	142.425	146.87	128.693	95.6617
6	0.457124	0.440655	0.243805	0.817669	6	107.637	179.304	136.733	76.1406
7	0.530299	0.248338	0.117387	0.15123	7	124.175	147.33	124.838	89.4839
8	0.508696	0.248568	0.214353	0.204199	8	89.1866	139.958	136.748	132.951
9	0.331469	0.143858	0.298151	0.398371	9	110.532	116.485	133.638	114.914
10		0.287813	0.203852	0.527825	10		136.261	123.411	87.6384
11		0.338747	0.0479679	0.213292	11		155.808	156.402	106.908
D
	Long term depression (LTD) with DCS oral administration, fEPSP slope (% of baseline)															fEPSP slope last 5 min (% of baseline)
	WT-V															WT-V	WT-D	HT-V	HT-D
	1	2	3	4	5	6	7	8	9	10	11	12	13	14	1	72.5501	90.525	82.6577	89.1123
-20	94.0801	99.5459	94.1781	99.4113	96.1991	101.306	99.8857	100.767	85.2518	103.955	97.7778	103.999	99.5828	99.9135	2	87.7606	89.5625	82.8165	72.1882
-19	98.0374	97.0323	96.0998	97.2971	99.3939	106.727	107.932	102.222	91.8847	103.286	94.3515	102.88	99.1604	101.279	3	75.5285	89.1224	110.229	83.9548
-18	98.0379	97.36	98.1029	98.6735	95.4388	101.903	101.257	99.4272	102.61	99.6175	97.5121	106.484	95.3935	101.608	4	71.6743	81.4475	91.9907	80.5769
-17	101.656	93.5051	100.334	98.1627	93.2705	97.4774	97.3251	101.345	109.714	105.987	100.032	104.801	101.427	99.1122	5	82.3956	73.8427	107.752	67.3746
-16	100.866	97.3005	99.1824	103.32	99.4827	96.7803	100.539	106.512	109.173	99.3525	98.6784	100.389	99.8409	97.0389	6	88.2724	65.5046	83.5022	65.6772
-15	99.1696	93.2328	101.993	97.1552	99.3052	93.7265	97.7698	101.936	98.6838	97.7977	99.928	98.4611	102.287	107.45	7	94.5047	50.6284	77.4774	83.4626
-14	103.806	99.4268	100.966	97.8363	100.104	95.4089	103.309	97.2017	97.7957	93.6232	101.844	103.643	100.935	101.042	8	76.8949	62.3077	106.113	72.9803
-13	110.024	97.052	99.6451	96.0485	101.435	104.945	101.166	100.165	104.857	103.213	100.178	103.198	96.675	103.823	9	88.0347	80.6303	80.2715	95.5851
-12	98.0945	100.39	99.2411	96.1336	99.9264	104.79	101.506	96.3794	101.015	102.487	104.197	105.315	99.7312	103.352	10	67.9784	76.811	102.09	75.347
-11	100.3	100.166	97.0178	108.91	99.394	106.727	101.31	89.7155	100.772	94.6189	102.407	99.5085	102.029	95.7671	11	77.714	80.2234	86.9954	66.9067
-10	108.44	104.146	100.305	103.668	101.08	98.1634	97.9406	98.4889	85.3077	101.523	102.594	91.4176	99.9498	103.116	12	79.4151	81.2943	86.579	94.1698
-9	97.9816	104.723	100.79	105.292	100.37	104.558	97.9405	98.4668	87.0838	103.302	99.9905	94.1925	101.591	102.504	13	74.9822	81.8791	97.4525	84.2403
-8	103.127	102.328	106.146	98.4606	104.719	96.7587	97.6662	94.2284	102.47	100.821	99.9488	99.8539	98.5979	101.891	14	74.7484			75.7499
-7	88.2008	103.391	98.427	99.0992	104.896	98.1196	97.1175	103.36	106.536	96.7571	97.0539	91.5514	100.247	100.902	15				64.3258
-6	102.334	99.8242	103.989	98.9431	100.991	96.5153	98.032	103.56	102.617	99.5239	98.6205	100.611	103.1	98.3114
-5	102.448	100.331	104.517	106.193	101.258	96.6918	99.9524	101.641	91.5517	98.0629	103.437	105.838	103.069	100.478
-4	101.77	101.891	105.28	98.2194	98.7478	99.9558	100.775	107.451	95.2704	97.1815	98.4702	93.835	100.06	100.007
-3	98.039	105.17	103.549	96.6302	102.5	98.9816	101.141	121.434	114.028	100.56	102.728	99.9091	99.3479	94.9197
-2	99.3945	103.977	96.079	98.1627	100.32	98.5396	99.9524	81.5964	103.845	98.9118	99.3032	97.4244	99.1138	92.6586
-1	94.193	99.2082	94.1565	102.384	101.169	101.925	97.4833	94.1018	109.533	99.4176	100.949	96.6888	97.8631	94.826
0
16	58.3474	43.0634	27.0736	42.2282	38.8053	34.195	52.033	40.1863	42.6906	52.4102	39.8423	35.6251	45.0698	43.3392
17	63.8886	54.0492	39.5977	51.6219	55.2256	49.6961	57.6241	44.8525	62.107	60.6692	41.0902	44.0668	49.0952	47.0136
18	72.9342	61.4069	50.3792	54.8035	60.7535	62.2598	65.8147	56.3569	72.1805	63.901	46.9219	62.1877	59.0282	54.7861
19	67.7331	66.6745	53.7605	59.7518	68.1829	60.3792	68.2444	63.1636	75.8644	68.6017	55.7387	57.0872	62.6399	58.3665
20	71.0117	74.3609	66.3875	63.8384	72.4167	74.9068	73.0644	66.0896	76.4542	71.9968	59.071	64.6932	66.5707	58.9315
21	74.1785	73.246	70.6252	71.9832	77.0822	81.9984	73.9531	69.8912	82.6149	74.4451	64.6579	65.6963	69.533	66.6091
22	77.6278	74.6529	76.9099	74.3529	78.806	83.2603	81.5431	72.2955	89.6082	74.567	70.25	69.0956	71.2289	67.7867
23	81.755	76.5646	74.8741	77.205	79.6926	79.3489	77.4807	78.0319	90.2742	73.1065	74.2644	70.115	72.3231	68.3048
24	80.5102	73.1933	77.413	79.4752	82.1779	88.2723	80.525	76.6823	90.2742	71.956	74.0562	69.6896	73.7453	68.211
25	87.8602	76.9461	80.9938	78.9502	80.4026	78.4693	82.6148	84.2322	92.2168	73.8083	73.1604	71.2071	75.8791	74.711
26	82.942	78.3232	77.2956	80.3408	83.2424	89.2017	77.2991	86.763	90.6908	79.9532	74.5507	78.7853	78.2315	80.5055
27	83.3375	79.9623	75.4171	79.5887	82.7987	85.6167	84.4712	82.8086	95.9632	74.7877	79.4815	80.1954	78.6065	74.947
28	80.9068	79.204	73.6561	81.5894	89.0108	91.2153	84.1319	81.0584	98.5163	74.4492	82.0587	80.6412	74.7769	70.9425
29	78.3621	82.0431	76.0663	82.4408	84.6623	89.9649	84.5892	80.9001	98.544	75.5102	77.9819	80.3066	78.0126	75.7477
30	83.3374	79.4128	80.168	81.3482	89.4545	87.4088	87.593	83.1355	100.403	76.2204	75.4465	84.3855	76.9736	76.7841
31	85.7123	83.2712	75.5052	86.045	88.6558	92.0893	81.479	87.6276	98.1833	73.2781	78.9503	76.6068	79.4349	73.4398
32	84.5818	81.7571	77.2662	81.8374	86.9698	89.3679	87.515	88.1973	96.7957	76.4569	84.7657	78.8356	77.3014	78.3382
33	80.5112	80.6782	79.0126	82.6604	89.1883	94.0815	85.2293	83.9161	97.6283	77.526	81.309	77.7211	74.519	75.5114
34	80.0964	84.4674	78.8952	83.0084	85.816	88.5268	81.1142	82.5553	98.5163	76.0609	79.6844	79.3482	79.3103	73.4384
35	82.4333	81.6794	81.889	81.9584	86.4372	92.7535	82.8252	88.4601	95.2767	79.9456	77.5809	85.5328	81.1314	76.4065
36	82.6585	86.1526	78.6457	81.0644	89.5433	95.2101	86.3253	78.4957	100.154	78.2478	75.7063	78.5291	79.5755	78.7155
37	83.2241	89.8089	81.0525	83.3489	91.6731	93.4175	87.1497	83.019	98.5163	76.7955	78.9345	81.711	83.3192	71.9781
38	79.8886	91.0012	84.5599	82.9942	85.5498	93.3398	86.3524	83.4831	100.292	75.6938	83.7249	79.9723	78.2861	77.3965
39	75.2525	90.6833	80.4655	82.3699	89.7208	83.5151	88.1556	78.8753	107.979	75.8234	82.0171	79.6937	82.1708	75.7002
40	84.3554	89.495	83.2391	78.6094	92.2944	90.1974	88.3385	90.9802	103.428	79.7335	84.5372	75.7376	82.3897	78.3853
41	81.415	90.2877	79.8638	79.9502	91.1407	105.102	87.1497	65.0405	102.179	78.444	77.4353	84.1519	78.9973	76.4069
42	89.3307	87.1341	77.5597	77.017	88.7446	86.7345	85.6865	82.0064	99.4598	79.4235	86.4325	78.5236	80.0924	74.475
43	85.2594	93.0439	76.5911	81.7881	92.0281	92.654	90.4418	77.9467	93.6321	75.4245	82.2878	77.5038	81.3498	74.9465
44	81.7545	89.7891	76.2242	82.9517	88.2122	102.037	85.5951	68.2354	101.042	78.4686	80.8923	81.3881	76.3717	75.3238
45	79.3794	88.6782	78.9099	79.1914	90.342	92.831	91.5392	66.9809	100.709	76.1099	78.1849	77.9719	76.0978	76.5482
46	74.4046	90.0772	79.761	80.1989	89.632	92.8747	93.551	66.5272	99.1823	78.6398	78.8723	83.1155	78.3955	75.7469
47	78.645	92.9585	83.1364	80.3124	92.2056	93.1181	92.8194	67.6659	102.79	78.7867	77.9299	77.944	78.5054	72.1202
48	78.9274	94.1608	78.7484	77.8151	92.8269	90.3966	87.1497	74.1823	105.926	70.7321	75.1807	76.629	80.3658	73.1561
49	78.1925	92.6803	77.413	77.6448	86.6147	91.1047	87.8813	63.5537	97.8922	72.7967	81.5588	73.6427	80.4748	75.8883
50	73.4434	87.9549	84.6626	79.2624	85.816	91.7907	86.8754	61.2445	104.455	75.9793	80.8506	78.8917	78.0673	76.6899
51	83.1114	90.2839	81.5661	74.2453	88.9221	95.2098	85.9609	56.0986	102.873	74.6246	76.2065	72.5781	75.3319	75.323
52	77.9102	88.0941	84.0497	76.0619	87.2359	91.6358	88.0642	71.9149	101.68	72.7312	80.4341	76.6183	86.2738	78.8564
53	83.111	91.0768	81.3606	77.9916	87.8571	93.4058	90.1675	64.5867	102.096	75.0979	76.0346	78.4566	79.7632	75.606
54	82.3766	93.0518	81.5368	75.9914	84.6623	95.7521	94.0997	68.7835	98.322	74.6083	82.1628	74.6398	83.6474	79.563
55	82.0937	90.6972	82.9603	77.5734	85.2836	95.8183	87.3454	67.7604	97.0177	70.4624	79.7777	76.5736	79.4354	83.4733
56	80.2845	89.4055	83.7821	78.2332	88.3896	90.0316	99.8609	64.6923	97.4895	68.5038	82.4697	76.4729	83.812	77.1606
57	86.4467	93.648	81.2286	76.6441	88.2121	86.3691	94.3741	94.894	97.656	71.5075	81.533	74.8351	81.2964	77.2539
58	85.599	90.6138	81.3313	69.7902	86.7922	91.8794	90.7161	61.8085	101.014	70.0016	81.9229	73.1076	77.5753	76.1238
59	75.5354	89.5823	78.8365	77.6724	84.8398	94.7783	93.2767	66.5591	92.1061	67.0309	79.4135	75.8266	77.5758	76.0767
60	82.9983	93.1474	75.9748	76.5802	87.8571	94.4023	97.6661	64.3553	98.0445	66.8022	78.6223	75.2248	77.7938	80.8816
61	74.8006	95.4325	76.87	76.3315	86.6147	89.8876	87.6982	65.6308	95.4636	68.716	73.8268	72.1489	70.6271	82.7192
62	83.4505	95.5519	78.2348	78.2545	88.0346	89.1571	92.728	68.1295	95.6579	69.8096	77.1017	77.6324	75.8794	78.244
63	75.4786	92.6705	77.1048	79.1981	85.9935	89.7327	95.38	64.3553	94.3258	68.1447	78.2886	80.4854	81.6232	77.5837
64	77.458	86.7288	82.975	79.0562	83.0527	86.5904	96.7517	69.3847	92.2445	72.8945	84.1831	78.9024	75.4417	75.8407
65	85.9383	90.4825	78.3962	80.7381	84.3073	86.1699	97.849	53.8119	82.9135	72.4374	74.0176	78.4627	75.4965	83.4733
66	84.4677	86.405	70.9629	76.6657	86.4372	84.2005	97.3918	53.5329	93.2435	75.2122	81.5063	80.485	76.4816	74.0507
67	82.3201	91.1899	70.1339	75.9562	84.4848	84.4882	94.6484	70.1018	89.5527	75.3428	80.2	79.1257	74.2382	75.6994
68	82.2637	93.5648	76.0626	74.8494	85.1061	82.8506	96.7521	65.3461	91.412	73.2045	82.1728	79.7779	71.6669	84.6034
69	82.4326	85.8565	74.1108	73.3379	81.645	84.0677	95.5628	68.9004	92.6331	72.1602	75.5397	77.4871	71.7213	76.7357
70	81.5285	89.1055	78.9793	76.268	79.9086	84.0234	98.1239	68.3099	94.0761	69.173	77.1431	80.3461	72.3777	77.6787
71	73.8959	89.5942	74.3458	70.5074	81.4675	89.567	92.7284	70.5657	91.8838	70.6585	79.7674	79.7494	76.044	73.8622
72	73.274	90.5442	71.0585	72.0182	80.6058	89.5227	96.203	65.0932	88.6369	66.9001	79.8094	79.8831	78.3959	72.5441
73	73.8956	88.3286	78.3079	68.68	82.6212	91.9681	93.381	107.335	90.3575	68.7489	71.8533	77.8996	73.5813	76.6891
74	69.09	86.6673	76.5177	73.494	81.9112	86.2363	94.5569	70.2291	87.6101	64.3131	77.7165	78.0108	74.0194	73.4859
75	72.5951	83.6687	77.4127	73.6717	85.3723	84.0679	95.6543	71.2518	81.6855	69.2714	79.4237	81.5328	72.8701	77.1606
	WT-D
	1	2	3	4	5	6	7	8	9	10	11	12	13
-20	95.5906	102.078	105.174	100.406	96.032	93.9642	98.0209	99.1533	104.695	96.8574	103.55	100.039	106.923
-19	96.1068	100.362	100.911	89.0753	94.9814	105.633	94.2949	103.12	100.139	98.4248	103.55	97.37	106.36
-18	100.505	100.175	96.927	100.32	101.388	105.294	89.333	99.4231	104.739	97.134	104.048	101.796	100.441
-17	97.2995	99.5497	101.547	101.235	99.597	100.186	85.1043	103.642	100.161	102.021	100.683	105.441	102.132
-16	98.6208	99.0653	103.665	99.4648	97.272	102.65	97.7023	102.895	100.14	101.675	99.1882	101.145	101.944
-15	99.1371	97.9715	101.216	100.035	90.1936	102.672	100.369	100.754	99.9252	104.372	96.0731	103.228	101.85
-14	100.662	100.784	106.42	98.4944	99.2525	100.251	98.5766	99.2792	101.944	102.113	99.439	99.2576	93.3941
-13	101.92	97.9933	102.837	100.102	98.0298	96.6915	104.516	99.7289	102.637	98.1482	95.1663	99.4528	96.1189
-12	95.4632	100.897	100.841	104.91	103.575	92.1397	100.68	104.181	99.1052	93.5606	98.1924	98.5416	97.9041
-11	98.7572	90.5775	95.9939	100.594	107.209	102.879	107.301	99.5853	98.9183	91.9016	99.562	102.967	100.535
-10	100.785	98.184	94.4683	98.1943	104.781	102.787	103.509	99.0906	96.6241	98.46	105.545	101.275	93.4074
-9	106.236	100.381	94.6512	101.306	102.714	91.6214	103.546	102.427	99.7656	99.7973	99.7762	97.8907	97.6222
-8	106.459	98.5652	94.8344	97.9462	102.886	98.1891	103.198	103.165	98.3569	99.4621	106.417	95.1017	98.5618
-7	102.804	98.0028	103.316	100.161	103.885	100.693	108.041	97.3226	103.71	96.9496	105.17	100.364	97.8101
-6	97.9667	104.153	102.523	102.791	97.9264	95.3623	102.531	99.999	101.328	102.46	98.371	96.1334	99.9712
-5	100.123	101.678	96.1162	105.858	97.272	100.113	109.285	97.3902	99.061	103.185	99.8479	101.926	99.1255
-4	98.4827	101.89	100.727	106.006	101.405	103.338	102.531	96.0593	100.822	107.911	97.7841	98.7369	97.6223
-3	101.127	102.175	92.9691	100.52	100.355	101.961	102.427	100.701	95.3857	103.888	97.7656	99.4528	98.9376
-2	101.228	102.765	110.273	93.5422	99.7692	102.334	96.0875	93.8107	96.6401	104.049	108.999	98.9321	103.448
-1	100.726	102.753	94.5902	99.0388	101.474	101.243	92.9477	98.2716	95.9023	97.6301	80.8732	100.95	105.891
0
16	43.6587	42.0639	46.2663	39.6826	45.5012	36.4867	36.2703	37.3933	42.7466	48.2208	60.5615	66.455	64.4674
17	52.3628	51.7933	56.4484	52.4958	53.6043	47.8247	39.3265	44.1389	50.8624	51.2926	68.8748	71.2992	61.9304
18	57.2435	63.9917	64.992	54.0034	59.6579	52.1854	48.2584	49.8686	55.2203	55.943	72.168	72.5266	76.5736
19	62.8616	70.3564	71.8878	67.134	66.9601	56.087	54.3314	52.9313	58.3781	56.9802	63.4277	78.821	78.225
20	64.4032	77.721	77.4411	70.3132	69.2723	58.5829	51.443	56.457	62.7469	58.6973	70.9927	83.8319	74.5209
21	67.5415	82.9027	75.7414	70.4857	69.8109	67.0175	54.3906	55.9219	63.9573	61.6365	75.2659	85.2638	86.6272
22	71.8916	83.2558	81.1636	77.0782	69.2637	69.8924	56.6202	60.2434	69.6356	68.966	75.5859	86.11	83.313
23	73.7341	83.4245	83.9098	80.5044	77.5177	69.341	59.2491	63.1576	71.8863	66.8566	67.1659	91.5773	86.7231
24	79.0716	85.8305	78.7321	81.2824	74.3406	74.1611	62.093	63.5533	73.3111	70.9249	79.6273	92.0329	82.401
25	83.3362	87.0778	85.2788	83.0786	72.4373	74.7348	59.1678	63.9851	71.9685	71.2719	76.6365	88.0626	84.6959
26	80.9131	90.4966	84.9476	81.9859	77.7074	73.8454	61.1897	64.6146	72.7608	65.7735	82.6179	87.6721	87.3809
27	81.922	89.2525	87.5542	84.412	78.1551	80.0027	58.279	57.9904	77.9827	65.5312	77.1351	84.0277	92.9232
28	83.1789	92.0963	81.5833	86.6899	70.5513	76.5995	63.1595	66.3954	77.2288	68.1016	75.5152	88.7135	85.7557
29	82.1668	92.8776	93.6738	83.7638	68.0456	76.3701	64.1595	69.4535	75.9961	65.4859	82.4041	89.5595	91.7969
30	82.7638	93.5964	88.7312	85.538	78.5168	77.6897	60.027	68.3562	80.5191	67.7445	79.093	95.4825	89.5409
31	82.8535	94.487	91.0065	88.0789	78.0001	76.2194	63.2781	69.6334	79.5175	68.5746	80.4102	92.0981	90.5749
32	85.356	94.7839	83.6665	87.3751	79.0335	79.2389	57.4719	69.274	79.3195	78.9242	89.471	93.9855	86.3464
33	89.0341	95.2839	87.0225	85.2454	78.3274	80.3578	62.5748	65.6716	75.9081	78.6592	66.9165	94.4411	87.5678
34	92.4153	94.862	85.8635	89.8939	79.0507	75.4425	63.9151	69.0218	78.5386	76.1123	84.6119	96.3938	85.7826
35	87.6299	94.0339	84.0938	89.0753	77.0012	79.9943	68.6105	67.2049	78.3457	82.3578	88.4031	94.5061	86.5352
36	85.7026	95.0026	95.9317	90.3679	79.4985	74.9644	67.3219	66.3909	74.9725	79.5242	92.9614	92.6187	82.1452
37	90.3599	93.7995	84.9481	90.3606	74.2284	75.9971	67.3961	68.3967	75.072	86.1735	94.082	90.7962	84.1187
38	90.3967	93.6589	83.2399	86.7974	73.9875	77.5351	64.5222	64.8124	74.4995	84.5954	91.8392	96.0683	87.1776
39	90.8489	91.8463	89.5246	94.3052	76.0196	78.0228	64.7	66.5664	81.3227	77.7258	90.9669	91.1216	83.0986
40	88.2373	91.9244	82.4466	94.0089	76.7257	75.4518	61.4833	67.5744	75.8755	75.6512	88.8487	93.4648	88.8842
41	89.903	93.5182	82.8127	96.3498	78.3962	71.4261	58.5899	70.6774	75.1818	81.149	92.7638	93.7251	85.3533
42	88.0128	94.2995	88.9758	94.0942	73.264	72.4875	63.515	69.8135	79.1434	77.7948	92.1578	89.4294	88.481
43	92.5611	94.0495	84.2774	93.8162	78.5685	74.6912	59.0417	69.9212	72.8929	77.1257	93.0666	88.388	83.5285
44	93.8261	94.612	90.6841	95.3979	76.3468	79.6523	57.9456	67.3354	76.4363	76.4813	88.5994	88.8437	88.1991
45	94.3071	95.0277	88.9758	89.7272	74.7279	75.5094	60.9966	71.7023	76.5245	78.5789	91.5895	88.5181	89.6353
46	90.8746	94.237	90.5015	95.1497	72.7645	74.0846	61.0341	70.3709	78.2853	80.6308	85.2349	89.6898	84.3603
47	87.1695	95.0558	82.5075	84.7307	77.3629	70.6993	58.39	65.8783	78.0544	79.6285	87.2287	89.5596	84.2257
48	91.9279	95.5558	84.3819	85.2899	81.7202	74.9642	62.6263	67.8166	75.0224	82.9474	85.9288	88.7785	86.5204
49	93.608	96.0995	87.5112	94.5831	81.7718	75.6241	60.7599	71.1538	76.2989	70.2343	82.2615	88.4531	86.936
50	91.269	92.3713	85.0097	87.5901	80.9107	68.8632	60.2859	67.6906	80.1334	72.2869	87.9938	86.11	89.3797
51	90.6453	93.5338	84.9487	88.0346	80.1013	71.1199	59.5453	67.0071	73.5092	69.8316	87.4595	87.0212	89.1646
52	91.1247	96.0964	84.2774	92.4422	82.5641	76.1121	58.9527	66.8092	73.9493	71.2719	90.0947	86.3703	90.3846
53	91.9344	92.2307	88.6097	87.6829	83.7696	71.5216	59.2787	66.2875	76.0842	73.981	92.9608	84.2225	88.225
54	90.4432	92.4869	93.6132	90.5531	79.929	71.3307	59.2491	64.3268	72.9812	73.1046	82.1721	83.832	83.0575
55	93.9143	92.8307	90.1353	89.005	82.7363	70.1445	56.45	65.8918	79.4736	76.4467	89.3468	80.0944	88.923
56	89.6127	93.7495	86.9015	90.7755	77.2424	66.9887	61.1154	66.4674	73.8613	74.7291	87.7624	82.2517	86.8172
57	92.0866	93.4588	84.0943	91.6755	79.4813	71.2634	55.4943	65.3162	73.4651	72.5335	89.7208	81.6477	88.4129
58	91.6857	90.7556	84.4605	89.0679	79.1196	67.1035	56.8792	70.191	75.9744	70.9033	88.101	82.0746	82.347
59	89.3899	91.7838	90.7456	89.5606	78.844	67.7634	59.4266	66.8992	79.0334	72.7471	85.359	79.6114	85.018
60	93.2409	92.2963	85.803	89.5606	78.2929	65.9656	53.5315	65.7838	75.6663	75.1559	74.6949	83.042	80.7757
61	91.1839	89.0056	90.6235	88.4901	77.5351	63.7279	47.8067	65.622	80.684	70.0277	80.98	80.122	81.0986
62	90.9963	91.615	89.342	89.0864	78.1207	68.4137	53.3241	67.187	80.9703	69.0818	75.7644	77.5759	81.9039
63	95.2049	92.8463	87.3287	82.9346	76.4501	67.1227	52.2578	67.3668	75.9301	71.4451	82.6177	78.5793	86.3583
64	95.9103	90.7025	87.3287	87.8234	73.884	69.0256	48.4956	68.662	78.4611	75.8478	79.378	78.6456	86.1043
65	96.0065	90.2994	87.8164	88.3308	75.3479	66.4438	52.465	68.2123	77.4047	68.5058	80.072	75.8282	81.1524
66	92.7439	93.6807	86.9626	87.4049	78.6548	65.5161	49.9025	65.7167	74.2575	74.4301	82.6181	78.6634	86.4269
67	88.5611	92.8151	88.3051	87.1604	77.234	66.5967	50.421	66.4943	78.4507	78.2553	81.3719	73.9398	87.3808
68	89.1367	90.765	89.8918	75.9227	68.3728	68.7962	48.525	58.7413	81.0142	74.2458	77.9531	78.0404	84.843
69	89.0324	90.315	87.6948	85.264	71.1456	70.7264	54.124	63.0136	79.5835	75.1211	81.6211	77.4082	82.963
70	92.2469	92.487	91.5389	80.9159	75.6926	67.0749	49.7767	65.0643	78.3515	73.6462	78.9862	80.7272	86.8296
71	90.2027	89.8681	88.1215	80.6674	74.3145	67.8494	50.0656	64.9208	80.1558	75.6745	76.6366	83.1722	84.2247
72	91.4213	88.6868	90.4404	81.3933	76.967	63.5844	54.7165	61.9164	82.1586	76.3545	75.2384	81.7774	84.2927
73	89.6176	88.065	90.4404	80.3194	71.6106	65.3535	52.0501	59.9151	83.876	76.7581	87.869	79.6487	78.5211
74	92.9443	91.315	85.742	84.4083	73.7462	67.5912	45.2073	63.2655	76.2602	77.6573	85.1103	81.5641	82.0373
75	88.4392	89.8775	90.8677	80.4489	72.5751	63.1445	51.1023	61.5209	80.701	77.6107	76.2627	80.3091	80.3198
	HT-V
	1	2	3	4	5	6	7	8	9	10	11	12	13
-20	100.597	98.384	96.1261	102.029	96.1804	99.7851	102.453	96.3162	89.4441	97.6238	102.052	99.9203	94.7084
-19	101.55	96.6354	96.2256	98.7442	109.331	107.453	99.4937	99.5136	99.6642	101.971	97.9661	97.2143	101.784
-18	99.1099	97.4893	100.104	103.23	99.077	100.943	103.636	103.795	101.258	104.244	100.138	98.0328	100.358
-17	100.863	102.453	99.8558	103.569	100.371	102.935	101.526	96.7313	88.386	98.315	98.4878	98.7022	96.9727
-16	100.482	94.5608	98.4634	102.975	104.019	105.371	101.365	102.574	97.775	105.627	100.748	99.0198	100.17
-15	99.5292	100.257	97.2699	101.447	96.7104	103.619	99.1304	95.1559	103.454	101.675	104.312	97.2143	93.9778
-14	99.6055	102.453	98.9607	100.059	99.2734	102.883	99.7604	106.469	96.9449	95.5488	100.313	96.1068	94.0471
-13	98.5763	101.477	103.337	104.63	92.3105	94.771	100.219	96.2161	98.4317	103.453	100.574	97.8883	101.942
-12	99.2624	101.273	103.486	103.187	102.934	94.3873	97.5838	97.5057	100.976	95.7459	96.6865	98.3362	106.723
-11	101.778	103.064	102.839	103.569	93.4438	93.967	96.1416	99.2933	99.3826	103.255	98.4876	99.4051	98.3685
-10	100.597	102.616	103.685	101.259	108.023	96.6729	100.047	99.9677	101.365	97.6239	102.485	101.379	100.003
-9	100.33	104.446	102.193	96.8104	94.9347	99.4396	96.5049	100.892	106.012	86.953	100.71	102.467	101.184
-8	99.7961	96.6756	102.243	98.2774	100.37	99.8305	101.431	103.097	108.986	100.588	104.486	102.097	104.165
-7	100.635	98.1002	97.9164	97.3439	99.3712	94.2977	100.076	98.0579	101.888	98.1178	99.5308	102.829	103.038
-6	99.3768	100.908	98.5131	98.4227	97.7574	97.0263	105.173	105.333	89.377	96.6361	98.6615	103.387	105.109
-5	99.6817	97.5717	97.8169	96.6529	93.9615	98.0264	101.431	98.0882	95.3508	94.9559	99.1832	101.774	101.794
-4	99.3768	100.908	99.8061	96.2105	104.708	99.1762	98.7008	104.507	107.446	102.761	100.922	102.049	102.15
-3	100.52	97.205	101.248	95.9924	97.0919	103.995	97.5549	98.6726	109.039	101.279	97.68	97.9124	94.7134
-2	98.7669	102.86	100.254	97.5803	106.484	103.018	101.335	94.8761	102.758	105.133	97.7421	102.232	92.8778
-1	99.5673	100.663	99.6569	98.0105	103.648	102.402	96.438	102.938	102.061	108.492	98.8354	102.034	105.916
0
16	40.095	43.6409	30.5529	39.9185	49.6918	58.3115	44.4958	55.1729	64.5033	61.0641	49.721	38.3611	42.8334
17	50.7732	56.6382	47.119	51.8288	58.1958	66.2346	53.7692	59.7343	63.9809	69.8581	58.6744	47.5643	56.2056
18	61.4462	62.6188	59.8995	57.8004	62.953	73.6699	61.4389	68.6447	70.7457	72.5257	61.7411	52.2911	65.6092
19	63.7558	68.1521	67.3338	63.7345	68.9427	78.12	65.0475	71.5767	77.0683	72.9215	64.9204	59.3592	76.8382
20	68.3194	73.8483	73.2019	70.0533	64.0558	79.4882	66.9089	75.9869	86.8192	75.9849	70.0112	67.6744	71.551
21	68.331	76.7371	80.1145	70.9896	71.6541	83.5474	73.8244	79.0238	84.3814	86.7554	72.5814	71.902	71.1179
22	70.2918	76.4523	81.1801	74.905	70.3223	80.8262	74.2918	85.337	86.3504	89.7191	72.8176	75.7154	81.8055
23	71.8547	80.3176	87.6449	80.4086	74.4639	84.3742	72.9461	84.487	88.9756	84.6802	78.6913	77.3621	88.4954
24	73.5261	81.05	84.4691	84.5303	77.6189	85.156	72.8222	89.3143	77.6841	80.2334	77.8343	79.0377	97.5051
25	75.6285	86.7056	88.8168	87.8155	84.4224	90.2677	71.8005	89.3592	85.6268	86.2606	81.969	82.6971	102.505
26	83.9756	82.4338	90.8913	87.6035	76.4727	90.3579	73.5046	92.8991	88.8819	82.9006	79.2997	85.668	107.902
27	76.124	85.3629	88.9513	86.2396	87.5772	86.5693	74.5736	90.42	82.6001	81.7159	78.4057	85.2347	111.058
28	75.5522	87.0719	90.3792	87.5245	82.746	87.772	70.9416	93.5279	80.6705	87.0521	76.295	88.764	110.888
29	77.6869	88.2115	90.7554	86.8336	89.2351	87.7119	67.9398	89.3749	81.7023	82.4077	80.926	85.2635	109.053
30	78.6399	85.933	96.0764	86.7244	85.482	92.6432	69.9202	93.6411	88.6005	84.2855	81.2736	89.8955	113.113
31	80.6983	88.3336	96.325	86.5549	92.0634	88.1629	69.8914	91.6701	83.7252	92.2886	76.1464	88.9566	113.723
32	79.9359	89.4729	100.204	87.0216	87.2317	88.644	71.8006	97.1799	82.5329	93.573	78.7789	87.464	117.013
33	81.1558	81.6213	96.3748	85.4881	93.6902	87.5013	69.1468	94.346	86.1629	85.273	80.5787	88.0322	116.988
34	81.537	91.3042	97.8666	88.6702	81.4645	86.6069	69.925	94.1109	80.8316	87.2491	86.1422	88.2874	120.812
35	83.2523	86.097	102.392	88.84	96.8206	88.6139	70.5648	99.703	77.7637	88.7309	81.6218	87.5121	120.431
36	82.5662	87.9687	102.342	91.5129	89.3766	90.5685	70.7698	95.4509	83.1354	89.2255	80.8415	87.5074	122.597
37	81.232	90.3282	101.198	91.0526	95.0707	88.6735	75.1035	100.052	78.273	91.6957	78.9892	87.5363	116.388
38	81.7657	93.2572	101.696	88.9431	91.2006	88.2531	76.2867	96.8602	78.6745	87.5453	78.3443	88.3888	117.597
39	81.232	81.7031	106.022	92.2282	102.095	86.7798	75.5187	99.4529	84.2337	90.3119	78.978	88.9422	113.215
40	81.88	89.1075	105.525	88.731	91.2992	88.8471	76.688	101.195	79.6937	84.9766	78.5066	88.5667	106.091
41	84.5102	91.264	109.951	90.3857	98.3735	87.4714	76.9072	105.121	80.1481	90.7077	83.3107	89.9581	98.5622
42	84.5865	87.5211	110.349	89.1432	93.2406	90.2378	74.6646	102.696	86.3504	89.3239	79.5369	89.987	91.9045
43	83.6716	80.2383	109.652	88.2761	100.814	86.9	77.8909	103.689	80.3357	88.6326	81.0257	89.9341	86.6241
44	83.6716	84.917	102.442	86.3124	96.5249	88.5237	76.5541	97.036	78.7012	89.0279	82.2184	88.3259	87.673
45	81.6513	91.0605	107.564	87.367	99.1619	86.2385	75.1465	105.916	76.8801	90.8061	85.36	88.2199	87.7762
46	82.6805	84.3072	105.077	87.5307	92.0883	90.2678	74.8314	107.242	77.9248	88.3354	86.4039	86.6935	92.0143
47	82.9474	89.5148	102.74	92.1373	98.7182	85.6973	78.9305	99.2848	84.4075	84.581	85.7086	86.5817	90.7861
48	82.8711	90.2473	104.033	94.465	96.5245	87.6594	76.3779	108.409	83.7106	93.2768	81.6728	88.0947	90.0096
49	82.1468	89.9217	104.303	94.0831	97.9674	90.3579	78.9307	102.695	82.1298	93.9688	79.6473	88.4225	93.9551
50	83.3667	88.0501	108.21	94.7135	101.11	89.8768	76.3444	105.742	84.5691	96.9327	80.7548	88.9711	93.1176
51	83.1379	83.9405	108.658	93.3678	102.662	91.7857	78.9313	102.982	81.2192	99.4025	79.9223	86.9921	96.6333
52	82.9855	82.8831	106.917	92.2465	92.6797	87.4714	78.6162	104.325	86.5379	95.1535	82.9016	91.6916	93.055
53	84.3959	81.9066	108.509	93.0043	102.798	87.351	75.7526	101.058	87.3267	98.0192	81.9717	92.1827	91.1231
54	83.2523	85.7711	109.851	90.8827	106.188	90.8992	77.9571	105.499	86.7514	95.3514	85.4487	88.3597	94.8264
55	82.9473	83.9817	113.382	89.5188	99.8397	85.8777	77.7191	105.226	79.7471	94.8577	82.7163	86.901	93.5036
56	82.0325	88.1314	110.995	91.507	114.297	92.9435	77.943	103.309	88.8819	97.5255	86.6647	88.5281	98.8751
57	82.7949	85.5685	112.288	91.8344	102.49	88.366	77.5661	97.6941	92.8197	110.864	81.3503	90.8537	92.6068
58	83.4429	85.5274	101.405	92.2829	103.205	97.0333	78.8451	106.628	88.867	104.738	83.5106	88.8843	96.0177
59	84.7008	84.8759	111.84	93.1012	104.881	90.9593	78.3724	102.68	79.532	105.134	83.884	89.4623	88.6123
60	83.4048	88.9032	110.846	97.0774	101.208	86.5692	76.2919	108.363	85.1042	107.406	85.8705	88.4126	90.9563
61	84.0909	86.5039	107.415	92.877	103.895	87.5013	79.7093	104.476	83.7511	104.245	83.3616	87.6565	94.8721
62	82.6805	84.0219	108.757	93.3437	107.332	82.9908	76.8503	104.407	81.8358	100.292	90.9236	91.1908	91.1618
63	83.9766	84.9564	109.901	95.1499	115.099	86.4111	77.1368	107.614	85.7065	100.391	81.7349	87.9263	92.26
64	84.7771	79.0584	108.409	94.2043	102.564	82.3745	77.8525	101.309	83.1219	103.651	87.0119	89.3853	90.3651
65	83.8241	80.3197	105.823	90.9008	108.8	89.1094	75.2753	108.674	87.4884	97.4273	84.8396	87.3773	90.6494
66	82.6424	85.0794	104.431	91.9009	108.984	80.7134	78.9552	106.742	87.6626	90.3119	86.2306	84.0168	94.9485
67	83.7097	84.6322	105.972	90.8826	113.015	81.0064	79.1118	106.076	81.5344	98.4154	85.7209	85.7358	93.2294
68	84.8914	83.7371	106.619	89.5129	105.669	81.6006	76.4971	105.189	91.0377	99.6988	88.6633	86.6069	97.3185
69	82.9474	85.649	107.116	90.4706	111.919	80.9308	76.0006	102.604	90.6358	86.5573	84.3178	89.65	97.5776
70	83.7097	83.4111	107.066	91.3251	105.497	80.8636	76.9975	110.213	85.319	105.429	84.492	86.5009	98.9564
71	84.129	83.4921	107.962	93.804	110.279	83.5172	77.9287	104.316	73.5443	106.121	84.5785	85.5187	95.4341
72	85.082	86.2581	112.288	92.1557	100.814	80.4803	77.5997	107.879	78.3271	104.046	85.8824	86.7417	98.9024
73	82.5662	78.8943	111.343	90.5068	111.585	85.1861	76.8217	106.765	83.0683	103.454	87.9696	87.1269	96.0904
74	81.7276	81.2546	107.663	93.2466	108.047	83.1113	77.528	105.317	85.4659	98.5136	91.2722	87.0787	97.7536
75	79.7835	84.1834	111.89	90.2401	108.036	85.2161	77.5089	106.288	80.9518	98.3161	85.2742	86.4287	99.0819
	HT-D
	1	2	3	4	5	6	7	8	9	10	11	12	13	14	15
-20	100.508	96.3345	96.1396	96.0873	100.804	95.1352	98.0972	102.832	95.7353	99.5613	97.5784	104.728	97.6366	103.48	97.4606
-19	98.9386	97.6446	103.835	94.9118	106.732	104.883	104.034	104.541	95.8306	100.278	102.667	99.2159	95.4692	96.9695	97.5059
-18	101.009	99.6379	97.3088	102.879	102.286	99.5439	97.263	100.807	97.8346	105.502	99.7684	98.8277	92.2174	94.427	100.432
-17	103.872	96.7792	102.568	104.267	100.392	104.64	103.004	100.439	94.2403	97.9224	102.537	90.6763	97.3164	99.2585	96.9187
-16	100.141	98.4469	105.588	102.581	89.9324	102.257	104.574	101.753	96.4032	100.022	101.636	98.5172	107.578	101.756	101.454
-15	102.512	103.315	101.594	106.935	100.756	102.292	96.4287	98.729	99.3722	100.176	103.181	94.4803	99.4837	104.668	99.3586
-14	104.807	100.948	101.262	98.188	96.6609	99.37	107.679	95.1263	98.9051	98.9764	105.437	107.756	94.5122	93.9071	98.1834
-13	95.6335	102.163	101.303	106.444	95.9207	101.074	108.401	98.6764	101.121	99.3053	108.013	99.9923	95.978	99.3327	99.7674
-12	99.7067	101.321	100.927	97.9753	100.45	95.9614	96.1343	110.17	100.22	96.6425	99.5108	96.8869	92.2184	101.651	100.764
-11	101.701	103.616	97.3924	117.125	103.743	98.7439	98.1947	105.199	98.4812	97.6814	106.725	94.7131	101.014	94.531	100.297
-10	103.145	99.765	97.9903	97.6863	105.062	98.7438	108.107	97.5192	103.603	101.815	100.54	101.933	102.989	94.3682	102.296
-9	100.383	101.687	102.568	101.02	104.944	97.822	97.0176	99.6232	103.157	102.788	102.151	100.147	99.4838	103.257	102.488
-8	99.2141	101.337	102.081	95.0467	91.5558	99.4916	101.286	99.2157	100.177	100.791	95.4519	96.8869	100.695	102.171	103.938
-7	98.4378	100.13	105.393	97.8985	100.556	94.8745	100.354	100.886	105.458	101.968	95.8389	98.6725	101.587	99.8827	101.242
-6	102.561	98.0656	99.6885	97.8696	103.732	97.0396	94.9565	95.3364	103.083	100.842	99.4462	107.678	99.803	100.998	99.7286
-5	99.4056	99.0027	104.127	99.0736	90.1087	101.787	94.1223	99.7811	98.2796	97.7911	99.3819	106.979	106.431	108.519	98.8525
-4	97.5863	101.306	93.9966	92.1565	98.956	95.6484	95.6436	98.203	98.407	98.7931	98.8667	101.001	100.95	98.6196	100.999
-3	93.3623	99.4475	97.8377	101.116	102.38	104.831	96.961	100.728	103.209	100.33	93.9067	99.4489	101.778	98.7378	99.8111
-2	105.299	101.059	91.298	95.3357	106.073	98.2829	95.3491	98.3609	102.881	100.637	96.0327	100.07	105.537	101.131	99.8361
-1	91.7768	97.994	97.1012	95.4034	98.956	107.578	102.393	92.0752	103.602	98.1785	91.3299	101.39	107.324	102.335	98.6688
0
16	39.9361	43.9266	52.9203	43.4231	52.7422	36.7233	52.2828	35.8664	52.3189	44.0455	49.2703	65.3682	50.7307	53.7456	37.1447
17	50.2708	55.9376	60.7826	53.3514	56.0243	49.0158	64.2145	40.9135	59.0518	50.6521	53.329	71.5006	58.506	60.3447	44.0235
18	58.0342	57.1329	66.7805	64.7195	66.0243	53.5115	73.6152	45.159	63.6003	58.9484	59.5127	77.6338	59.1437	67.6289	50.2002
19	64.028	59.1139	68.1164	61.6274	71.0012	56.3807	75.5847	51.7711	71.075	62.0722	64.5364	82.5246	72.5916	75.6401	58.4175
20	67.1581	66.0862	73.9334	60.9818	69.2486	60.6585	80.1339	51.3372	78.2952	66.784	68.3365	79.9627	67.1098	78.4496	62.6013
21	73.1349	67.5316	79.2768	74.8735	64.7249	58.2415	84.5506	55.2297	84.6034	69.0886	66.9196	81.0495	69.5317	79.3857	68.126
22	76.8001	69.7868	83.2982	69.1802	74.1898	66.0616	85.1392	62.0343	87.7204	72.1615	72.3304	81.5931	72.3359	79.2813	70.7637
23	78.4772	74.3927	80.9324	79.8452	69.7314	63.9974	87.2002	60.8379	88.9078	74.0052	72.9094	83.0681	74.3116	79.0735	73.6388
24	85.9568	74.6786	82.8389	76.8776	66.1839	62.5198	88.6233	63.2311	90.5403	76.7196	76.3883	88.9682	80.3024	78.0329	73.0052
25	85.7816	76.2033	83.7158	79.4211	71.7903	64.6584	88.6233	63.3827	96.5523	78.4608	72.7069	91.2196	79.2189	86.2527	75.8607
26	85.723	75.8856	83.2288	87.2632	72.8957	72.5707	89.0159	64.3094	97.8882	79.0754	75.4865	89.5893	82.0232	77.5129	78.5365
27	87.3592	76.7433	85.6218	79.2573	73.7019	66.7454	88.1326	62.4292	95.1417	82.7627	76.9675	82.3693	83.9984	70.2298	79.188
28	86.0737	76.2351	85.2178	77.051	70.5193	65.5104	88.2798	68.4909	97.8876	79.8436	78.5778	90.6762	88.7142	80.7377	81.3852
29	87.3592	77.5057	86.0533	73.5829	75.7193	71.4228	90.2917	71.9425	97.9617	79.3315	75.5871	87.5708	81.3849	77.0967	83.3146
30	85.0218	76.5209	85.1074	86.7139	70.2486	68.0408	93.236	66.3672	98.0151	81.7898	78.3207	86.3288	85.9104	76.1603	83.2119
31	86.1321	76.2668	86.2065	82.0702	71.7958	67.6843	87.1511	69.7205	97.7389	79.4851	73.7561	79.0311	84.699	82.7149	83.3907
32	87.3592	79.2844	93.1504	76.1838	76.8138	67.4238	88.8687	72.0611	97.9618	83.0701	78.9645	90.2879	88.9686	81.6746	78.2682
33	90.0472	82.6356	95.3212	76.1487	67.4845	60.415	89.2122	72.5999	99.5955	82.8653	77.8696	87.105	84.8903	77.2008	79.6735
34	90.4818	80.3486	94.2984	90.9239	78.8846	56.2847	88.4761	74.3229	99.8175	81.6362	76.2598	89.3564	83.6798	86.8763	79.3157
35	94.1376	77.9186	93.1364	79.2473	74.908	71.4056	92.1564	72.6397	98.5763	84.6066	82.5718	87.5713	90.3717	79.8018	82.4072
36	91.0494	77.8868	93.3177	84.0645	85.9307	60.7104	88.4761	70.904	101.005	84.4529	75.164	90.0551	85.0814	76.8886	80.5549
37	90.9409	77.8233	90.45	84.7006	78.8011	66.9191	91.3713	73.1129	98.8524	84.2481	76.7098	90.5985	91.1355	72.7561	81.1297
38	94.8388	74.5833	87.0128	90.24	82.155	60.1224	90.6352	72.9093	99.7435	86.2968	72.1367	90.2104	84.0609	79.5925	80.6698
39	91.4167	77.728	91.1325	79.3822	80.7312	71.8232	90.9787	70.2465	98.4816	83.8896	79.2866	91.8407	89.7334	77.617	79.9545
40	92.5015	76.7115	91.0063	77.0511	74.6545	64.3367	91.0278	74.2572	99.0648	82.5068	78.2564	82.6799	85.0819	79.3704	78.8942
41	93.787	76.775	90.9651	85.4228	82.2248	66.6497	87.3474	74.494	98.2591	86.5527	77.9343	93.471	86.1021	88.9577	78.7281
42	88.3698	79.618	95.2659	99.6708	74.8486	67.2145	90.6352	73.1132	102.267	82.9165	79.6089	88.2695	89.5423	81.7492	79.1872
43	96.2997	78.6968	95.8221	84.0165	74.9314	71.3016	89.4575	72.5016	99.7429	82.3019	79.093	93.0052	87.3121	84.7955	75.3432
44	95.4231	78.268	97.2553	88.5446	69.8841	60.9887	90.4389	71.4364	104.567	84.5042	78.7714	74.0625	89.8608	82.2993	75.9561
45	94.9895	74.9168	92.0366	79.7774	74.59	73.9445	87.6418	71.9098	100.443	83.4285	71.4283	81.6707	84.4441	83.2357	76.9274
46	100.507	74.4403	94.012	81.675	76.284	66.9452	89.4575	76.2034	96.7744	84.1457	74.2628	94.6356	87.1846	75.7886	78.0136
47	96.7672	73.9003	91.7307	82.3404	74.6133	67.58	89.9973	68.5106	98.6296	83.9408	76.3885	86.2515	91.709	82.2238	74.6599
48	91.8002	75.7268	94.2775	89.7871	68.3191	66.0237	87.4456	75.6771	97.8881	83.6335	77.934	96.2658	82.0227	86.2525	73.8483
49	94.5466	76.1556	92.8153	84.5076	75.2016	70.9453	87.6909	73.9352	95.0142	82.4043	73.1026	93.3157	89.2872	83.0567	74.6982
50	94.7804	72.6297	94.6115	80.7313	75.7079	70.7451	90.5371	77.2947	101.079	85.0163	76.645	97.1979	82.977	77.929	76.8256
51	94.2545	76.6956	91.3552	65.5099	77.3664	72.3102	85.8753	74.6648	101.672	86.1434	72.5877	91.2977	81.8949	81.823	72.1625
52	93.9623	78.9668	98.5075	81.666	77.9193	65.58	86.5623	72.929	104.568	81.9947	73.8111	90.3656	93.1748	81.5706	73.9252
53	93.378	75.6315	94.0688	79.8159	68.378	69.0061	82.5384	71.9822	103.826	78.3075	70.4622	94.0926	93.621	78.2415	74.7118
54	91.7172	78.665	93.3454	87.9856	71.4544	72.5881	84.4522	71.1472	101.599	83.019	69.6246	89.1234	85.2093	84.4985	71.1601
55	97.4683	78.4109	85.2744	82.629	73.9075	67.3799	85.3846	68.4055	100.114	80.9703	70.784	91.763	89.6706	82.9227	72.8787
56	96.5589	75.9492	88.9344	83.6116	64.8718	70.7104	86.4151	73.4025	102.193	84.709	66.6619	88.27	90.1163	72.6231	72.495
57	98.9877	76.0445	94.4866	101.761	66.5895	64.7975	88.1326	74.2968	96.8595	82.0458	65.6958	90.2107	79.2189	83.0271	70.8534
58	92.5191	74.6945	88.5293	134.632	63.3248	65.8643	84.7466	72.7387	101.154	80.6119	67.306	93.9367	89.7334	73.3212	70.6938
59	97.6436	73.6462	95.9478	79.7097	68.2956	70.9189	80.0921	70.5094	100.189	80.7143	70.6559	93.859	87.2493	77.929	69.7928
60	99.6889	75.2345	90.8825	80.0951	71.2839	64.2845	82.9944	71.5219	97.2944	74.9785	71.4929	96.0328	83.8072	78.3894	68.6687
61	90.0472	73.6939	88.1824	81.0779	65.4014	62.954	81.9987	75.5064	98.2591	78.5632	67.6924	96.0334	92.3464	81.6747	71.9904
62	94.6635	74.8533	89.8247	79.0645	69.3136	63.4757	83.2049	79.136	96.997	77.0784	65.6958	97.3527	88.8426	74.8818	74.0858
63	89.755	77.0927	88.4193	82.1184	64.1308	63.5802	81.1509	75.0857	96.4775	76.0537	68.7229	97.7412	83.4885	85.8364	72.6998
64	93.0858	75.9492	92.5384	79.9797	65.4427	70.9535	82.7633	79.9381	97.3681	77.6926	69.4958	98.6724	87.1218	75.6693	70.4064
65	86.0157	75.6315	91.3696	80.5288	68.1957	64.4063	84.7963	83.8831	97.8873	78.8705	68.1436	94.3249	81.3221	78.9695	68.6627
66	88.002	77.0768	89.2955	74.5077	68.6128	66.467	83.2745	86.0266	98.8528	72.8276	66.211	98.0516	86.8027	81.8827	70.5984
67	92.9689	75.0756	89.755	76.2322	62.601	64.3453	82.7347	75.7564	94.3996	74.6197	70.5267	97.8184	87.313	81.9868	70.4195
68	91.2743	73.2174	90.9935	75.057	63.6484	66.2845	82.4894	76.611	96.997	76.4122	68.0144	96.2658	81.3854	77.6462	68.0688
69	89.4044	73.8209	88.558	71.4054	68.025	65.5511	84.5013	85.5267	100.04	74.6709	64.2145	98.9829	85.2735	78.0331	66.0056
70	84.7882	73.0109	89.1425	79.2959	64.4486	64.728	83.9618	79.3595	96.4775	72.0078	69.1094	97.1974	88.8421	80.9015	68.8994
71	90.9822	75.2503	88.8227	93.6398	62.6189	62.3628	82.742	77.2487	95.4385	74.3124	66.1466	95.7229	78.7733	77.2897	61.8666
72	87.3008	70.9939	85.038	82.3112	65.6251	64.9974	83.5764	73.9349	94.6964	75.9001	67.5636	94.7907	87.4391	77.4679	65.8205
73	88.4695	75.9333	81.0159	77.9373	71.5078	68.9099	84.9362	72.1729	93.2126	76.5147	65.3094	92.7728	86.8659	68.966	65.501
74	89.6382	67.8492	80.9876	73.1011	69.649	64.3452	85.3358	68.9315	97.5913	75.2855	66.2111	97.3525	85.4637	79.6978	63.9365
75	89.1707	70.9145	83.9098	75.8951	67.4721	67.771	80.7228	72.6134	96.9868	74.7222	69.3026	90.2104	82.6597	75.328	64.5045
E
Paired-pulse ratio DCS oral administration
	WT_V													WT_D
	1	2	3	4	5	6	7	8	9	10	11	12		1	2	3	4	5	6	7	8	9	10	11	12
25	2.35855	1.87204	2.11491	1.99561	2.29611	1.57449	2.16656	2.00351	1.73596	1.55878	1.61727	1.6023	25	1.91585	2.07339	1.61435	1.43181	1.85057	1.66666	1.61911	1.62959	1.46128	1.74816	1.5028	1.73092
50	2.44198	1.75047	2.03787	2.0021	2.37294	1.71795	2.29626	1.83726	1.85486	1.57132	1.71114	2.04333	50	1.67419	2.2183	1.64629	1.66451	2.00096	1.87747	1.595	1.68939	1.66775	1.91376	1.65408	1.75267
75	2.63531	1.80571	2.02866	2.01327	2.10114	1.76226	1.85003	1.83627	1.82474	1.6283	1.73495	1.78594	75	1.67384	2.11386	1.53251	1.67689	1.87552	1.76136	1.80753	1.68191	1.82742	1.81921	1.45682	1.73114
100	2.03668	1.74422	1.86827	1.78266	2.12913	1.9119	1.92954	1.74192	1.74844	1.52996	1.60426	1.77053	100	1.64487	1.93009	1.43196	1.6336	1.82705	2.0114	1.6583	1.88776	1.6557	1.70957	1.4706	1.70444
200	1.8984	1.53054	1.71167	1.50231	1.6114	1.45192	1.56007	1.41962	1.48847	1.37061	1.52777	1.4552	200	1.61406	1.66681	1.34302	1.41377	1.56815	1.6646	1.55343	1.53084	1.47649	1.48263	1.3061	1.43472
300	1.53255	1.27706	1.40491	1.34582	1.50425	1.3353	1.32549	1.34284	1.28583	1.22849	1.33395	1.35813	300	1.36502	1.71274	1.19756	1.24632	1.34497	1.3064	1.31382	1.37281	1.39426	1.41357	1.13128	1.39213
	HT_V													HT_D
	1	2	3	4	5	6	7	8	9	10	11			1	2	3	4	5	6	7	8	9	10	11	12
25	1.98556	1.71582	1.54716	2.09796	1.6345	1.77663	1.88521	1.86441	1.7424	1.52277	2.07732		25	1.98199	2.03861	1.66949	1.96148	1.941	1.68721	1.79973	1.98116	1.8247	1.59745	1.58552	1.39509
50	2.12569	1.86642	1.70341	1.91763	1.75768	1.72963	1.89048	1.84552	1.76224	1.31691	2.25957		50	2.11572	2.01118	1.68228	2.03867	2.072	1.89154	1.93911	2.05066	2.00473	1.54452	1.75381	1.67689
75	1.9963	1.83639	1.58608	1.92336	1.70836	1.67033	1.78034	1.77643	1.72387	1.56601	2.1872		75	2.08646	1.9374	1.6122	1.95302	2.07807	1.72196	2.039	1.95284	1.99106	1.59274	1.73467	1.56623
100	2.091	1.7453	1.41152	1.7386	1.68037	1.7604	1.81605	1.7053	1.67925	1.48972	1.96949		100	2.12081	1.66133	1.6215	2.47689	1.82584	1.5837	1.78987	1.9014	1.82454	1.47032	1.7282	1.51684
200	1.58498	1.43634	1.2868	1.45955	1.41636	1.43844	1.58236	1.39168	1.44961	1.24631	1.60078		200	1.62296	1.6102	1.32541	1.54826	1.52166	1.35713	1.42918	1.51044	1.52285	1.24472	1.48	1.41862
300	1.48241	1.29246	1.03154	1.39989	1.20876	1.23883	1.43369	1.33432	1.29739	1.15316	1.27832		300	1.57104	1.36774	1.11421	1.48466	1.47567	1.2694	1.45946	1.50867	1.3121	1.15544	1.3384	1.18005
F					G					H					I
	Closed-arm entry number with DCS					Time in closed arm (s) with DCS					Open-arm entry number with DCS					Time in open arm (s) with DCS
	WT-V	WT-D	HT-V	HT-D		WT-V	WT-D	HT-V	HT-D		WT-V	WT-D	HT-V	HT-D		WT-V	WT-D	HT-V	HT-D
1	23	21	20	30	1	273.868	284.411	273.534	273.335	1	25	16	13	5	1	54.3199	70.5357	98.8301	17.5505
2	28	21	11	21	2	192.788	182.579	136.867	253.715	2	21	15	16	17	2	78.8772	139.069	195.058	99.8978
3	26	25	18	21	3	337.931	287.214	137.001	192.054	3	7	13	15	15	3	42.9087	50.9166	111.376	103.701
4	33	17	3	21	4	181.778	236.431	33.7664	110.975	4	13	11	6	23	4	108.306	103.501	305.633	198.595
5	18	28	14	20	5	209.271	264.192	272.066	392.05	5	25	8	17	8	5	111.776	54.8537	58.5907	25.9587
6	23	31	20	11	6	211.34	331.858	324.651	308.502	6	28	10	6	4	6	96.0941	61.1932	59.7252	118.116
7	27	26	39	10	7	188.651	260.655	312.572	451.802	7	14	26	4	0	7	78.8104	68.9342	59.6584	0
8	20	32	18	20	8	242.104	272.4	238.953	176.028	8	25	14	3	14	8	111.576	60.7928	156.544	175.427
9	16	27	18	22	9	231.026	234.763	63.4545	151.075	9	15	17	7	28	9	109.908	127.725	290.316	197.826
10	28	18	12	16	10	240.769	221.684	185.487	256.554	10	20	15	5	7	10	62.3277	126.457	238.598	155.667
11	26	30	39	29	11	200.529	339.198	168.96	257.703	11	12	7	12	12	11	75.5406	25.8253	79.1418	64.1924
12	31	35	7	34	12	274.735	257.185	133.99	310.257	12	16	16	29	13	12	95.4935	85.9508	164.284	46.7721
13	37	33	11	23	13	275.27	238.3	164.623	262.716	13	9	10	17	6	13	119.917	92.4906	185.243	65.7957
14	29	12	28	22	14	342.628	446.93	228.143	300.4	14	13	1	24	7	14	29.6922	12.2776	75.4694	68.9947
15	24	29	12	20	15	254.183	238.44	54.9641	373.143	15	3	13	18	6	15	35.7683	89.9575	349.396	35.0322
16	16	35	13	28	16	256.554	306.415	152.74	158.078	16	7	12	18	15	16	155.667	38.4353	209.927	114.439
17	32	27	12		17	306.415	184.575	65.8605		17	14	26	12		17	54.7837	84.8138	158.545
18	22	31			18	227.008	226.408			18	22	13			18	65.4602	105.364
19	32				19	173.909				19	15				19	78.3457
J
	Distance moved in open field (m) with DCS
	WT-V
	1	2	3	4	5	6	7	8	9	10	11	12	13	14	15	16	17	18	19	20	21	22	23	24	25
10	59.0965	49.3345	51.5437	46.8898	40.8058	49.3826	46.5704	58.4179	56.1541	67.2183	52.481	53.8727	59.7846	56.403	68.7691	54.4658	59.7902	61.8971	50.6044	44.7871	56.5283	46.8442	71.5299	56.2016	60.4707
20	35.7924	34.266	40.068	32.9788	32.1973	36.0281	38.9734	37.4596	44.0015	32.3261	32.0247	38.8452	43.9022	44.951	47.7201	39.9219	38.6727	38.1697	32.2816	28.9791	42.3561	34.6166	40.8311	39.4071	45.4117
30	34.5695	39.1255	36.8655	29.6578	32.8981	33.8737	38.1223	33.2373	30.9159	31.3619	31.9395	41.2222	41.1473	42.2653	42.6938	36.6071	42.7085	29.0042	33.9314	31.9328	35.609	30.4722	44.5718	33.9195	35.9734
40	35.2407	33.0952	29.8503	28.891	32.468	32.3425	39.7791	28.2013	34.2491	29.504	35.3845	45.7322	34.5562	45.8278	40.5718	34.8209	36.4658	28.4907	27.8153	24.3128	32.4272	25.4551	49.661	42.9141	30.6655
50	24.3548	32.8889	40.4958	24.3959	25.9671	29.8075	31.9287	31.7675	30.4789	28.0372	32.5512	44.9932	42.2457	29.29	30.3156	23.36	38.2532	34.7473	23.7102	23.5957	36.3502	23.369	38.1436	35.9745	31.7897
60	21.8165	27.0213	25.2656	18.2317	30.8394	27.5463	34.1247	26.0937	28.4826	23.6378	22.0672	41.9211	32.1171	33.7683	30.4733	22.7277	26.5017	34.8681	23.443	31.2923	35.4588	25.3372	32.8015	35.5931	27.3761
	WT-D
	1	2	3	4	5	6	7	8	9	10	11	12	13	14	15	16	17	18	19	20	21	22	23	24
10	51.793	52.6919	47.3096	55.8603	40.6368	61.3144	40.0608	59.489	54.6582	53.5793	54.2036	63.218	48.3985	49.6376	56.7998	49.7701	66.4538	55.4078	41.1136	49.6901	52.1084	52.3881	51.3678	49.0499
20	39.4165	47.9024	32.9335	43.6764	34.7733	42.4653	39.3695	33.0822	39.2389	36.0681	38.4922	45.778	31.2519	35.8215	36.2972	41.7172	46.7794	34.4442	23.6499	35.2919	31.3368	39.5942	39.3163	37.6547
30	30.4989	34.4447	32.3738	40.9005	43.0744	42.0488	38.4011	34.2553	38.3256	29.558	34.8952	34.7633	23.3152	25.5866	34.8836	39.0069	38.98	37.0445	19.5489	30.0609	38.6626	35.563	43.1356	40.6143
40	32.021	32.2404	28.143	35.6517	33.9437	35.965	39.0175	28.6153	36.7876	34.4841	36.5308	28.7015	23.4714	29.6691	33.4019	39.1376	35.4331	46.1455	18.5226	27.7441	31.4677	33.5955	33.3452	29.0505
50	33.8867	38.0334	25.8245	31.5001	35.4108	34.8403	35.111	23.8063	31.5261	20.9159	27.5163	35.912	26.2634	24.7459	37.2981	32.8312	38.3533	31.9614	17.9542	28.4023	34.4851	30.0451	35.2169	41.7641
60	26.6374	32.8687	31.6418	31.3232	27.704	28.0154	34.1722	23.2558	29.0134	23.3462	39.1407	27.0601	27.9964	26.747	25.0499	27.4428	30.4817	35.2124	27.3246	25.0732	32.7763	28.2252	30.7382	37.8495
	HT-V
	1	2	3	4	5	6	7	8	9	10	11	12	13	14	15	16	17	18	19	20	21	22	23	24	25	26
10	43.9165	22.7087	44.2782	46.2681	37.7221	34.3397	45.793	46.9703	44.0106	46.8191	56.8326	21.3439	24.9159	26.7263	26.5093	30.7856	21.8071	35.939	35.1912	36.8161	44.2507	49.3484	40.0404	49.6363	43.1977	24.2763
20	37.3152	23.5721	33.6661	20.8815	26.4451	17.9775	28.1642	30.4107	35.5003	27.4047	36.4034	19.4893	21.1753	24.2638	21.0464	26.3888	18.299	25.4252	21.9074	27.3687	32.7156	37.8652	33.2174	38.4965	33.304	25.1868
30	22.7727	21.9648	31.4916	18.1966	20.4843	19.7779	27.1625	26.2083	31.4222	17.2481	21.3884	14.8813	15.6159	21.4393	22.369	28.2994	14.5593	17.7089	20.2412	27.7124	38.2203	37.124	22.7886	33.9898	26.6851	25.541
40	30.2187	16.8698	35.1316	21.7335	21.2297	15.1042	26.9466	25.664	27.3054	22.8754	36.1085	16.5979	16.4294	17.0891	22.2526	26.6079	17.5804	18.3814	18.4271	19.6021	33.6551	28.7821	24.1996	27.3369	23.1116	30.3062
50	23.0356	18.4859	25.373	13.1796	22.6935	10.5569	22.2947	17.3508	16.2405	14.5078	21.3035	20.005	16.7143	21.4306	26.1928	21.9886	11.432	13.4315	16.5012	19.0844	32.2456	27.164	22.8481	23.7959	19.5446	31.0504
60	22.2251	12.6625	29.9722	19.6703	21.1376	18.5345	15.8455	19.166	24.3893	20.7176	20.8017	23.0373	17.1989	17.7465	22.7055	18.6988	16.9197	24.3006	20.0533	17.2966	30.5869	25.2679	31.7531	21.2666	22.4733	20.1464
	HT-D
	1	2	3	4	5	6	7	8	9	10	11	12	13	14	15	16	17	18	19	20	21	22	23	24	25
10	62.9004	31.385	32.1698	50.3299	33.951	47.1696	35.5066	42.9407	41.6262	73.2738	48.6098	36.6962	46.6713	46.2831	32.6564	33.2264	33.8345	45.2052	42.64	37.7237	60.5487	57.9807	49.6663	40.6471	33.8496
20	48.0468	22.4136	30.88	35.5233	26.0738	29.9563	27.6868	26.4076	26.2441	53.0461	34.5695	28.8137	29.5933	32.9987	30.483	23.8033	26.1467	17.3393	27.2322	34.8121	31.4047	38.4976	38.6036	31.8508	22.6102
30	46.1107	26.6118	30.4163	27.542	25.9612	23.7783	22.8569	17.9328	26.2913	29.0459	35.5033	22.4723	33.7934	27.1352	29.9276	19.9096	26.8806	17.5551	26.5367	30.5161	22.7951	21.5082	30.2292	28.3848	22.327
40	36.4361	23.0771	29.6942	31.9223	19.0081	26.1395	19.9123	18.5804	20.9903	23.7662	31.1538	19.5987	23.6184	25.4977	25.7552	15.7311	28.0966	21.6769	25.164	22.975	27.4714	34.1129	30.6381	21.8033	18.1017
50	28.3733	16.2442	26.2862	20.7669	27.24	19.071	24.655	16.951	22.3555	17.9886	20.5656	13.2851	22.7562	32.0581	20.6782	18.0743	23.4734	14.5024	26.1823	24.492	25.5498	25.5556	25.817	22.8715	17.208
60	33.4788	14.7842	23.4643	16.213	24.6158	17.9798	19.6986	19.7194	21.3671	12.8816	21.8163	16.3762	20.2968	29.0825	24.5013	22.8176	30.2604	13.4923	19.6689	26.5204	30.4444	22.0121	23.0014	17.2637	17.192
K
	Total distance moved in open field (m)
	WT-V	WT-D	HT-V	HT-D
1	21087	21425.3	17948.4	25534.6
2	21573.1	23818.2	11626.4	13451.6
3	22408.9	19822.6	19991.3	17291.1
4	18104.5	23891.2	13993	18229.7
5	19517.6	21554.3	14971.2	15685
6	20898.1	24464.9	11629.1	16409.5
7	22949.9	22613.2	16620.7	15031.6
8	21517.7	20250.4	16577	14253.2
9	22428.2	22955	17886.8	15887.5
10	21208.5	19795.2	14957.3	21000.2
11	20644.8	23077.9	19283.8	19221.8
12	26658.7	23543.3	11535.5	13724.2
13	25375.3	18069.7	11205	17672.9
14	25250.5	19220.8	12869.6	19305.5
15	26054.4	22373	14107.6	16400.2
16	21190.3	22990.6	15276.9	13356.2
17	24239.2	25648.1	10059.8	16869.2
18	22717.7	24021.6	13518.7	12977.1
19	19178.6	14811.4	13232.1	16742.4
20	18490	19626.2	14788	17703.9
21	23873	22083.7	21167.4	19821.4
22	18609.4	21941.1	20555.2	19966.7
23	27753.9	23312	17484.7	19795.6
24	24401	23598.3	19452.2	16282.1
25	23168.7		16831.6	13128.9
26			15650.7
L
	Center time (s) with DCS
	WT-V
	1	2	3	4	5	6	7	8	9	10	11	12	13	14	15	16	17	18	19	20	21	22	23	24	25
10	39.2384	28.9617	39.3719	71.6034	37.0363	81.413	67.9999	53.1187	51.5171	74.0058	48.5142	36.102	30.2296	35.3975	43.173	67.7269	60.9208	79.0656	68.6672	60.9263	108.636	43.6414	79.075	45.7087	59.5899
20	54.787	24.7576	43.3342	38.7713	114.137	90.2217	117.915	81.0126	103.635	101.499	52.1177	70.6025	46.6457	69.0294	73.5343	83.4075	47.8425	84.9371	108.773	55.9881	121.315	73.7366	115.043	56.1182	108.23
30	59.5917	43.5093	40.6524	39.7055	125.431	125.294	74.6731	214.944	87.5524	75.1402	79.7447	94.0632	53.6236	62.1312	41.9719	67.1925	64.7909	74.3283	116.485	55.1874	127.121	47.2448	104.499	53.9162	73.809
40	35.1678	38.0372	100.861	130.778	110.041	114.925	171.285	94.2923	91.8736	158.072	48.4474	82.4933	39.0672	77.7404	75.6696	95.9526	51.7126	91.3424	125.352	59.6584	87.1494	68.1313	113.174	63.2581	127.643
50	20.0158	85.5504	90.6888	91.239	210.806	100.244	127.992	131.662	99.0467	253.264	92.4868	122.065	64.3296	101.763	65.1933	51.2456	117.504	95.279	207.333	25.3544	123.07	45.5766	123.136	101.16	152.422
60	37.307	94.8262	45.5112	45.5112	115.388	112.856	209.272	134.474	129.994	127.792	160.637	105.641	19.2855	73.8034	206.08	65.7251	106.629	93.4775	66.2687	106.308	82.0585	28.7606	253.354	60.0796	182.44
	WT-D
	1	2	3	4	5	6	7	8	9	10	11	12	13	14	15	16	17	18	19	20	21	22	23	24
10	32.4318	70.3355	52.9852	62.261	35.4347	35.9685	63.3954	55.3876	46.7791	43.3091	34.5004	40.7065	36.5691	49.5804	80.2047	36.9673	92.6212	75.4072	76.0722	65.4621	86.2793	68.4629	80.8743	68.196
20	62.3944	68.734	81.413	79.8115	105.17	55.7212	79.0359	73.8056	75.6741	42.3748	28.9617	88.0862	20.5535	45.0427	63.1228	64.8233	157.149	166.096	109.571	136.73	80.6742	99.8555	85.4786	118.976
30	41.3738	106.438	77.676	105.904	73.443	58.9621	81.9469	41.9077	81.8134	56.4553	46.312	83.2148	42.3748	110.839	70.0623	88.9302	156.348	188.318	37.5023	108.236	96.7678	139.832	119.109	115.852
40	50.3827	45.1108	36.8361	75.5406	90.3174	95.1888	82.4808	59.5917	179.576	44.2937	35.0343	68.0666	25.6918	57.9216	70.3284	160.335	98.8939	135.049	28.6272	104.633	129.24	82.0087	140.062	140.584
50	67.9332	47.313	81.8802	51.9842	215.011	42.7085	52.3846	62.261	221.217	98.4461	9.54268	87.3522	28.895	73.2028	159.543	170.69	170.448	239.034	56.9874	141.821	85.4786	167.863	95.4878	128.652
60	49.9911	36.1687	70.8694	47.2463	149.155	55.2541	82.414	34.8341	274.335	90.2305	34.7006	60.7349	49.5819	32.0304	79.6041	92.2181	126.367	250.988	96.2914	123.231	74.9355	124.539	71.0897	132.121
	HT-V
	1	2	3	4	5	6	7	8	9	10	11	12	13	14	15	16	17	18	19	20	21	22	23	24	25	26
10	65.5976	206.736	81.8134	41.6408	33.1658	97.5622	36.0353	33.2315	74.9378	44.6424	44.7078	242.704	183.018	326.871	249.657	190.047	411.991	110.308	105.303	107.098	80.3223	152.674	125.315	136.263	97.6927	402.418
20	55.1874	84.2825	114.579	17.0834	58.3905	24.6241	18.0176	34.6329	51.7825	35.4336	22.7542	138.987	48.6452	170.413	174.425	127.382	256.571	36.1687	38.663	76.7372	76.4217	179.298	111.703	109.17	55.7195	217.018
30	31.0304	76.8753	99.6976	15.9489	66.1981	86.2845	22.6889	58.4555	51.9159	14.4137	26.7579	103.614	378.95	172.179	149.079	48.8769	261.012	47.4465	73.5802	93.219	128.118	131.454	84.0106	121.916	86.8157	184.77
40	32.4318	161.475	98.1628	22.6221	82.414	61.3267	37.3032	49.4469	72.6022	19.2182	40.3037	104.963	364.929	169.967	91.6898	168.068	384.929	38.3042	37.837	96.0216	94.5536	92.485	81.8753	163.956	73.5365	62.1238
50	20.8871	171.251	183.109	6.8734	44.0431	4.60451	36.9028	29.2945	33.7654	23.5557	13.746	127.496	122.635	191.092	134.799	19.9523	218.485	10.3435	54.6535	156.611	65.436	240.53	92.0179	83.546	32.4308	72.0662
60	31.0304	152.816	143.153	80.0117	73.8811	47.1128	48.5142	240.095	137.664	64.4612	17.2158	200.914	225.187	108.89	61.3267	47.0446	79.8758	69.4013	91.7653	255.301	86.7282	110.392	48.4445	64.261	52.5832	43.4399
	HT-D
	1	2	3	4	5	6	7	8	9	10	11	12	13	14	15	16	17	18	19	20	21	22	23	24	25
10	47.313	30.0294	105.17	64.3964	57.1893	86.9644	172.364	104.166	57.1209	28.96	60.4536	97.5593	110.171	161.286	46.7124	146.806	146.192	140.684	130.991	105.897	119.977	80.2738	70.8651	133.527	270.649
20	48.1138	18.1511	65.8645	93.7585	34.0333	81.1335	51.0484	44.242	98.2266	39.8003	59.9201	47.3116	137.125	106.768	52.5181	85.4144	83.9388	163.481	110.772	152.941	167.22	94.8205	73.4008	92.0874	201.919
30	47.7134	68.8007	58.9244	59.9921	39.7723	39.2094	49.18	69.3992	106.034	17.3978	74.1993	91.2449	74.0092	50.181	40.4774	44.4422	119.169	313.812	88.8176	139.607	48.6447	214.13	45.1203	75.4049	210.26
40	114.112	65.8645	127.058	59.258	27.0932	59.4204	124.919	48.1123	186.243	15.2685	45.3737	44.7509	94.0226	102.097	50.078	21.2201	67.8583	255.73	126.787	241.076	116.374	134.123	231.934	47.3116	94.7538
50	32.6319	16.7497	119.18	195.725	81.2796	83.4817	56.1199	90.5526	138.531	5.27151	32.7625	18.0171	179.57	109.571	243.505	52.4692	75.4648	74.8897	121.649	194.512	122.889	87.4804	101.627	85.8815	199.116
60	33.6329	79.0107	98.8339	84.0244	68.5338	75.5406	265.652	77.6737	90.4859	0	31.0943	28.2935	83.6794	67.5975	47.1795	57.4351	74.3305	72.0038	75.872	61.4565	113.486	122.78	35.566	56.5203	149.829
M
	Center time (s)
	WT-V	WT-D	HT-V	HT-D
1	246.108	304.507	323.517	25534.6
2	315.642	374.1	278.606	13451.6
3	360.419	401.66	575.031	17291.1
4	417.608	422.748	557.154	18229.7
5	712.839	668.531	307.901	15685
6	624.954	343.803	425.75	16409.5
7	769.137	441.658	719.283	15031.6
8	709.504	327.788	434.146	14253.2
9	563.619	879.395	676.641	15887.5
10	789.773	375.11	106.698	21000.2
11	481.948	189.052	303.803	19221.8
12	510.967	428.161	327.177	13724.2
13	253.181	203.666	678.577	17672.9
14	419.865	368.617	597.5	19305.5
15	505.622	522.865	480.47	16400.2
16	431.25	613.964	407.787	13356.2
17	449.4	801.827	566.953	16869.2
18	518.43	1054.89	1020.6	12977.1
19	692.879	405.051	401.802	654.889
20	363.423	680.113	784.988	895.49
21	649.35	553.375	531.58	688.591
22	307.091	682.561	906.833	733.608
23	788.281	592.101	543.366	558.513
24	380.241	704.381	679.112	490.733
25	704.134		398.778	1126.53
26			981.836

## Sheet: Fig5
B					C					D					E
	Closed-arm entry number with DCS inj					Time in closed arm (s) with DCS inj					Open-arm entry number with DCS inj					Time in open arm (s) with DCS inj
	WT-V	WT-D	HT-V	HT-D		WT-V	WT-D	HT-V	HT-D		WT-V	WT-D	HT-V	HT-D		WT-V	WT-D	HT-V	HT-D
1	28	31	16	26	1	286.121	270.84	269.876	235.03	1	18	12	11	11	1	84.1415	70.8631	138.207	113.578
2	28	21	27	4	2	300.868	381.284	312.115	217.266	2	15	7	12	7	2	54.5819	34.4317	11.3448	245.025
3	33	22	14	7	3	308.293	377.457	296.957	49.2482	3	10	8	9	7	3	80.2762	11.1429	108.973	373.699
4	20	19	20	5	4	290.726	283.443	262.908	475.651	4	11	22	10	0	4	58.8524	75.8652	156.878	0
5	22	27	32	25	5	390.025	398.045	383.407	191.721	5	3	11	8	21	5	9.74229	6.0057	30.6939	130.461
6	22	32	32	7	6	246.293	312.096	394.107	185.788	6	20	21	12	6	6	102.961	59.9235	4.40418	237.773
7	27	22	7	24	7	250.356	303.154	121.79	292.736	7	25	13	5	11	7	107.028	64.4612	323.593	58.4537
8	32	31	10	23	8	338.424	288.816	68.0626	375.679	8	15	21	7	11	8	44.0378	52.5181	346.719	11.0101
9	31	34	21	13	9	319.093	325.433	209.519	16.1487	9	8	9	9	17	9	29.2936	19.9516	174.355	339.589
10	30	29	9	0	10	329.082	363.823	139.399	0	10	10	8	15	3	10	50.1097	44.2433	255.843	469.846
11	21	33	21	36	11	268.329	249.37	338.675	307.082	11	23	23	15	15	11	80.0784	83.1456	51.7856	58.2535
12	34	26	23	29	12	227.89	287.081	263.175	371.353	12	17	12	17	15	12	62.5279	87.5524	139.862	13.8798
13	24	25	7	21	13	283.603	147.536	76.2057	235.883	13	22	15	13	7	13	103.765	95.1541	330.047	112.036
14	26	26	14	26	14	268.722	315.385	152.345	413.326	14	15	17	14	1	14	79.9425	45.7795	115.176	1.00095
15	21	20	14	20	15	247.842	219.875	364.714	241.63	15	16	15	22	17	15	77.2756	102.23	51.8445	108.77
16	25	26			16	369.495	224.82			16	6	16			16	32.4317	116.648
17	23	14			17	252.802	345.482			17	15	9			17	68.388	32.366
18	41	28			18	233.235	270.873			18	31	21			18	106.774	74.9423
F
	Distance moved in open field (m) with DCS inj
	WT-V
	1	2	3	4	5	6	7	8	9	10	11	12	13	14	15	16	17	18	19	20	21
10	53.7513	47.4997	41.6641	41.2908	37.8284	33.9284	50.1776	50.2907	37.304	41.6085	46.7824	50.6911	49.5752	54.217	40.7469	59.0964	39.577	41.1184	44.538	46.3184	42.7142
20	28.8676	26.2392	23.0159	25.7911	27.9088	26.5763	31.408	38.6474	21.386	19.235	34.0639	34.0366	29.6048	46.1059	29.7983	41.4602	14.8776	35.036	24.3518	33.7485	29.5454
30	37.7382	39.3668	20.4123	18.4978	19.3889	29.4454	28.5175	32.3267	24.7423	26.497	28.8153	27.1812	28.0511	45.123	31.3231	45.9822	26.9303	28.2411	26.1572	18.1002	28.4758
40	24.7762	22.7376	17.0079	22.3681	27.0909	30.2407	30.1876	28.1404	23.3935	18.0473	28.8895	30.516	26.2051	29.4782	29.5449	42.8654	20.7271	30.5104	29.2497	32.6689	22.7647
50	24.423	37.2174	10.8282	22.0969	22.9922	30.0177	20.7609	27.7031	22.2377	18.4291	25.4962	30.5703	25.6957	39.5655	25.1093	50.1942	20.1207	34.828	25.8754	23.6633	20.0088
60	30.3928	38.6684	20.3663	17.1193	24.3915	23.7541	24.5415	19.6667	23.9844	21.2243	25.4073	25.5525	27.1699	29.784	30.7311	21.2585	21.1194	30.9467	23.0399	16.7269	23.683
	WT-D
	1	2	3	4	5	6	7	8	9	10	11	12	13	14	15	16	17	18	19	20	21	22
10	60.5529	49.101	48.3648	60.995	55.4332	66.6334	45.4373	51.9186	48.0725	49.0271	58.1501	50.052	54.1798	54.2373	35.3238	52.1478	32.2426	83.8006	46.94	40.0703	41.2565	33.8246
20	32.2405	33.2418	40.2378	46.445	31.4518	36.3415	35.8897	35.7767	34.0674	38.6365	44.7339	36.2046	48.4609	34.5922	29.0556	37.1199	23.7399	49.4652	32.9479	26.5887	22.6345	29.8764
30	29.1452	19.0764	28.1701	37.0368	34.1962	27.1929	25.4706	32.5338	33.2656	35.2528	48.3679	33.6603	44.5371	32.5911	23.5892	35.6238	24.4584	31.9265	30.9498	22.2917	26.6954	22.8224
40	29.4189	24.3135	34.7885	34.2767	33.0388	27.9882	27.7891	28.6614	28.542	26.4498	43.024	30.477	43.7712	16.0593	27.8639	37.7872	20.2345	30.0911	29.1278	18.9993	21.8056	26.45
50	31.4859	23.3859	22.6917	24.3615	27.875	33.4918	29.1947	33.4589	24.6299	30.1652	32.221	30.579	28.2342	27.4295	24.7434	30.3891	27.3501	33.6542	22.992	16.7269	24.5145	29.3832
60	34.4369	11.9447	30.5109	38.3889	29.7716	29.9081	31.4573	22.4733	27.482	23.6688	33.5244	28.3752	27.1166	22.0525	20.7372	19.9418	25.3293	38.4099	22.5177	18.4212	20.5268	16.6355
	HT-V
	1	2	3	4	5	6	7	8	9	10	11	12	13	14	15	16	17	18	19	20	21	22
10	33.964	25.9825	31.6439	32.2564	35.6088	36.2268	36.1713	39.2751	33.051	39.3721	37.5976	43.9689	47.1312	44.2743	37.7556	30.8523	23.4194	41.8806	41.4964	45.5339	47.7447	31.2669
20	26.1856	16.342	22.257	26.1488	19.4859	23.6962	30.2902	29.4939	24.3162	23.9333	19.8011	34.3639	29.6558	23.9702	22.8555	20.04	18.9649	21.5549	20.0231	30.6218	23.6348	30.1
30	24.3341	18.88	15.6101	18.774	22.9128	27.5613	28.4926	26.2797	22.4951	17.0389	24.7235	23.5273	29.9109	22.2086	22.5761	23.135	18.3567	24.2208	23.1411	25.9296	22.5191	29.1127
40	20.4326	12.5699	9.10306	19.007	15.5866	26.1717	21.1204	20.1148	23.6281	21.4792	16.9089	29.0851	19.6413	21.7651	16.55	19.9666	15.9546	22.0691	24.7871	20.8907	19.107	24.2841
50	17.2289	12.1524	13.7613	15.7245	13.7564	26.6883	18.6636	21.7933	20.4548	17.2814	13.9586	17.0795	14.4684	17.9004	19.1835	18.1472	15.0582	13.2478	18.355	17.7806	18.3873	18.6303
60	19.1751	11.4515	9.40261	14.5049	16.5249	22.0627	20.2276	20.1545	17.2716	21.4654	22.778	16.669	16.9419	27.8674	10.4118	19.2096	16.1551	21.2917	20.9008	13.9148	19.456	28.5001
	HT-D
	1	2	3	4	5	6	7	8	9	10	11	12	13	14	15	16	17	18	19	20	21	22
10	47.5326	30.7168	35.1915	40.3833	40.7843	32.6056	36.3675	45.4554	55.1191	38.3379	46.3796	48.1769	45.9048	49.9703	44.0152	30.2736	32.097	42.5118	25.3368	32.0221	39.1752	48.6752
20	31.8603	17.9503	26.771	25.9	35.923	31.1097	33.2848	27.3063	24.9277	27.4854	35.1786	37.2114	29.7194	26.3138	28.186	25.108	23.0384	21.7501	26.1882	23.9099	29.3601	35.6033
30	26.6939	17.7238	12.1694	18.2663	32.0795	21.0437	34.8232	28.777	28.042	20.6027	27.72	26.3074	21.3376	22.7764	21.6548	23.8514	26.136	22.5489	16.8617	20.7637	25.2924	21.517
40	20.8247	15.8816	31.3168	11.0086	27.233	18.9451	32.9877	24.4047	27.0567	30.1227	31.6974	27.7714	28.6283	19.8289	20.2086	20.4367	18.6094	23.3679	21.5643	11.5334	28.1078	17.9649
50	17.7247	22.2205	24.9699	6.06525	24.4144	15.5854	24.1792	22.0691	17.6385	27.0324	17.2336	20.96	18.2274	21.4937	21.1517	18.9798	15.5466	16.7163	21.5969	8.88962	19.3475	15.414
60	14.6343	14.812	18.2539	11.3915	21.6198	14.6402	31.5179	17.5175	26.1382	19.4234	25.1589	19.5886	23.692	17.9311	18.2685	17.8114	17.45	18.4699	14.0495	14.2502	31.6036	11.7565
G
	Total distance moved in open field (m)
	WT-V	WT-D	HT-V	HT-D
1	199.949	217.28	141.32	159.27
2	211.729	161.063	97.3783	119.305
3	133.295	204.764	101.778	148.673
4	147.164	241.504	126.416	113.015
5	159.601	211.767	123.875	182.054
6	173.963	221.556	162.407	133.93
7	185.593	195.239	154.966	193.16
8	196.775	204.823	157.111	165.53
9	153.048	196.059	141.217	178.922
10	145.041	203.2	140.57	163.005
11	189.455	260.021	135.768	183.368
12	198.548	209.348	164.694	180.016
13	186.302	246.3	157.75	167.51
14	244.274	186.962	157.986	158.314
15	187.254	161.313	129.333	153.485
16	260.857	213.01	131.351	136.461
17	143.352	153.355	107.909	132.877
18	200.681	267.348	144.265	145.365
19	173.212	185.475	148.703	125.597
20	171.226	143.098	154.671	111.369
21	167.192	157.433	150.849	172.887
22		158.992	161.894	150.931
H
	Center time (s) with DCS inj
	WT-V
	1	2	3	4	5	6	7	8	9	10	11	12	13	14	15	16	17	18	19	20	21
10	43.1381	29.2927	29.8932	68.8674	67.464	63.7271	71.257	79.1442	52.3132	47.7091	82.3424	58.7909	51.1167	40.8388	58.4537	57.1243	18.6177	27.8923	66.2001	51.9175	35.1136
20	43.2105	19.3505	16.081	196.217	126.114	60.5908	129.036	111.843	33.4965	31.4279	91.4174	74.5396	80.6123	72.9359	56.185	58.459	19.0848	21.4197	38.7725	76.7418	67.7871
30	58.322	35.1646	17.7491	42.2829	47.2504	77.8072	68.5882	137.401	55.9164	73.2651	58.387	64.8635	68.2001	85.2142	63.9922	54.7219	67.0636	34.5773	36.637	42.2414	43.9097
40	30.6291	25.7562	19.7509	114.763	103.365	76.1389	96.9442	145.542	42.0374	188.701	58.0534	72.0038	92.3571	190.447	52.5757	56.3235	38.0361	22.3417	38.7057	77.676	72.6044
50	66.73	36.5658	5.47153	133.21	44.4422	140.533	76.9282	138.536	85.4093	28.2251	93.6861	70.4023	70.0019	187.978	132.57	69.3366	53.0503	40.5706	51.6521	61.0598	43.4425
60	84.4134	43.0383	11.4769	71.1401	49.0465	300.552	93.9418	73.9391	86.6103	191.103	55.2508	66.9322	62.5946	104.966	60.9227	30.5642	50.0475	95.6212	71.4721	84.5494	172.636
	WT-D
	1	2	3	4	5	6	7	8	9	10	11	12	13	14	15	16	17	18	19	20	21	22
10	106.968	54.2482	63.8606	29.4955	32.4308	47.7715	62.3832	99.51	51.0454	94.359	59.0543	33.6329	66.4109	24.4899	27.6279	67.4013	20.6196	35.3477	80.3477	63.464	96.0273	33.4975
20	67.8644	64.0566	64.995	51.784	57.588	70.1227	62.5166	121.732	66.726	93.1579	113.601	40.1059	87.9654	30.8293	36.37	96.4306	28.0933	71.951	49.5166	59.6602	58.8576	40.3704
30	45.7768	30.3607	43.1076	66.1314	75.6718	78.7963	65.4523	83.1896	69.4618	129.66	111.272	64.2629	76.0493	58.6557	86.6875	88.1394	22.2878	136.859	59.8604	140.008	80.8792	29.1601
40	72.0684	106.495	75.138	59.5753	92.688	67.8542	76.261	94.7431	105.16	123.588	108.767	68.2668	100.949	16.0152	75.6764	88.1051	15.4814	41.6323	69.2032	34.1011	115.98	44.5076
50	144.137	82.4066	91.8872	38.5207	85.8815	90.2054	98.2805	121.802	241.948	112.106	184.436	31.2306	91.7061	121.982	61.462	92.6268	35.7673	69.6033	91.3588	36.1698	64.7968	79.9827
60	80.0093	71.6637	111.306	108.306	76.4059	92.5296	107.484	94.8262	45.775	93.829	200.451	159.698	149.088	24.957	79.8806	30.5642	39.5709	102.628	66.8675	78.8796	53.6525	58.8115
	HT-V
	1	2	3	4	5	6	7	8	9	10	11	12	13	14	15	16	17	18	19	20	21	22
10	88.484	106.028	169.299	137.998	126.755	77.0755	167.23	50.7178	198.316	176.878	99.0303	105.773	36.9006	50.4464	30.2954	274.527	67.7309	133.068	76.1344	79.8043	47.5103	83.4125
20	125.847	52.1797	183.071	75.9387	52.6291	59.6584	248.71	30.097	73.601	115.324	58.2822	31.3542	44.3741	45.3083	13.2793	160.686	34.2325	34.368	33.4965	38.234	55.0142	50.6481
30	83.7517	26.6237	36.6774	32.5642	113.316	74.6441	116.914	35.636	70.3313	47.7105	69.3094	40.9855	23.9008	168.421	20.8198	262.382	29.161	54.5884	260.965	48.5098	33	42.9074
40	63.1266	48.7767	5.60549	25.6243	230.065	98.6589	255.3	38.7057	60.0492	48.9784	31.5642	28.7624	54.9049	43.1063	15.6148	67.6642	19.0848	34.2345	50.4449	70.7296	26.0906	39.2372
50	30.9627	9.07474	7.40725	45.71	377.287	145.142	253.665	32.0991	44.8472	48.1776	23.4897	12.8129	195.913	13.8794	21.4203	130.257	73.403	24.4914	25.2224	1.8016	56.185	15.3479
60	59.5899	25.2224	14.8145	47.1781	179.199	121.986	198.194	86.4873	37.4344	38.9024	67.9999	8.80889	63.8587	103.161	11.4108	85.1974	44.6424	42.9443	146.796	15.2135	61.7901	41.8397
	HT-D
	1	2	3	4	5	6	7	8	9	10	11	12	13	14	15	16	17	18	19	20	21	22
10	84.1104	218.341	114.976	43.1756	30.9646	28.1584	150.672	66.1981	88.2144	166.153	108.039	67.464	31.162	95.6298	44.3755	226.682	91.9539	168.683	48.9102	72.0706	137.593	41.5048
20	45.2791	109.971	56.854	18.7517	21.8888	28.2251	153.808	44.9106	184.036	136.459	43.576	46.7777	31.4289	115.65	41.5061	258.707	80.4096	206.517	47.9093	40.84	137.46	58.3203
30	43.0408	23.8226	36.835	26.5593	31.2982	30.2269	128.518	147.249	34.0313	229.211	18.2178	36.9017	24.3557	198.067	29.8283	196.792	27.9599	259.363	20.6851	36.7693	19.1509	59.9217
40	20.8198	13.2793	131.792	3.1364	66.734	19.1504	236.078	71.232	35.1597	128.518	62.3944	53.7844	50.3129	73.0737	18.1506	44.3755	52.3163	107.163	50.178	1.73503	56.6521	20.4855
50	27.426	76.5587	70.8005	4.47104	61.3953	14.0125	105.57	186.783	86.6856	104.806	35.1678	32.7644	56.185	80.0538	39.7711	85.7674	9.80931	39.9021	49.7109	1.13444	89.7492	44.641
60	7.80741	157.931	90.4192	5.93915	239.81	35.4982	82.3668	38.3797	39.0603	134.014	20.7537	16.816	56.2517	60.6558	24.8903	32.8785	33.8988	200.045	33.2295	22.9558	47.844	11.0101
I
	Center time (s)
	WT-V	WT-D	HT-V	HT-D
1	326.443	516.824	451.762	228.484
2	189.168	409.231	267.905	599.904
3	100.423	450.294	416.875	501.677
4	626.48	353.813	365.013	102.033
5	437.682	420.666	1079.25	452.091
6	719.349	447.28	577.165	155.272
7	536.695	472.378	1240.01	857.013
8	686.405	615.803	273.743	554.752
9	355.783	580.116	484.579	467.187
10	560.431	646.7	475.971	899.161
11	439.137	777.581	349.676	288.149
12	407.532	397.197	228.497	254.508
13	424.883	572.169	419.852	249.696
14	682.38	276.929	424.322	623.13
15	424.699	367.704	112.84	198.522
16	326.529	463.267	980.714	845.202
17	245.9	161.82	268.255	296.348
18	242.423	458.021	323.695	981.673
19	303.44	417.154	593.059	250.623
20	394.186	412.283	254.293	175.505
21	435.493	470.193	279.59	488.449
22		286.33	273.393	235.883

## Sheet: FigS2
A				B
	Oocyte expression				MK-801 τon
	WT D+2	C456Y D+3			GluN1 WT/GluN2B WT	GluN1 WT/GluN2B C456Y
1	0.3	0.02		1	1.05171	0.801118
2	0.16	0.02		2	0.927426	0.750082
3	1.51	0.01		3	1.04738	0.747696
4	1.43	0.015		4	0.973488	0.503219
5	0.2	0.01		5	0.85358	0.431878
6	0.08	0.01		6	1.14642	0.44039
7	1.38	0.02		7	0.926958	0.623485
8	4.5	0.01		8	1.0039	0.546572
9	2.23	0.005		9	1.14976	0.458784
10	15	0.03		10	0.860998	0.514332
11	12	0.01		11	1.19471	0.78099
12	10	0.03		12	1.05572	0.931046
13	12	0.005		13	0.80796	1.04424
14	3.6	0.015		14	1.17565	0.830603
15	15	0.025		15	1.1235	0.748637
16	13	0.025		16	1.07749	0.824617
17	11	0.07		17	0.944906	0.746452
18	4.7	0.01		18	0.962197	1.13267
19	11	0.05		19	1.14431	0.677105
20	12	0.02		20	0.965419
21	12	0.03		21	0.800451
22	18	0.06		22	0.806071
23	1.86	0.04
24	0.68	0.04		C
25	1.17	0.03			pH sensitivity
26	1.9	0.03			GluN1 WT/GluN2B WT
27	0.9	0.04			1	2	3	4
28	1.3	0.02		6.3	0.0241626	0.0138678	0.014798	0.0116622
29	1.2	0.03		6.8	0.101796	0.110948	0.100729	0.105109
30	2.64	0.04		7.3	0.42244	0.454442	0.424448	0.424448
31	1.7	0.02		7.8	0.800759	0.821883	0.790831	0.754469
32	1.7	0.03		8.3	0.967102	0.974629	0.970169	0.885401
33	2.7	0.07		9.3	0.99623	0.997858	0.994811	0.898947
34	2.12	0.04			GluN1 WT/GluN2B C456Y
35	5	0.01			1	2	3	4	5
36	4	0.01		6.3	0.0731829	0.10446	0.0793179	0.0856197	0.0766113
37	0.3	0.01		6.8	0.298261	0.287496	0.301559	0.299451	0.28405
38	0.3	0.02		7.3	0.642756	0.623791	0.642921	0.645286	0.634719
39	0.8	0.02		7.8	0.863028	0.854786	0.866721	0.8771	0.870081
40	0.17	0.02		8.3	0.976411	0.967997	0.972335	0.973211	0.961259
41	0.54	0.03		9.3	1.00131	0.993569	1.00177	0.999218	1.00834
42	0.12	0.03
43	0.18	0.06		D
44	0.1	0.07			Spermine potentiation
45	0.5	0.03			GluN1 WT/GluN2B WT	GluN1 WT/GluN2B C456Y
46	4.61	0.1		1	9.48224	2.66898
47	4.61	0.06		2	9.85637	2.76773
48	1.62	0.06		3	10.0217	3.03308
49	1.5	0.1		4	9.09463	2.83675
50	2.6	0.07			8.81352
51	1.7	0.013
52	3.2	0.175		E
53	10.5	0.13			Glutamate dose-response curve
54	7	0.07			GluN1 WT/GluN2B WT
55	1.6	0.02			1	2	3	4
56	13	0.12		0.1	0.0216386	0.0158983	0.00983969	0.0104944
57	8	0.08		0.5	0.137732	0.13616	0.113058	0.104206
58	16	0.03		2	0.562912	0.568529	0.547578	0.534664
59	4.4	0.03		5	0.838228	0.843914	0.829138	0.835125
60	11.6			10	0.927316	0.926618	0.929918	0.927103
61	15			30	0.973677	0.964233	0.965518	0.973869
62	16				GluN1 WT/GluN2B C456Y
63	3				1	2	3
64	14			0.1	0.033574	0.026241	0.02864
65	8			0.5	0.166333	0.142197	0.160742
66	8			2	0.498343	0.511094	0.555452
67	10			5	0.769885	0.766232	0.801332
68	5.2			10	0.890504	0.880632	0.918463
69	10			30	0.956851	0.96473	0.973104
70	11
71	10			F
72	11				Glycine dose-response curve
73	7				GluN1 WT/GluN2B WT
					1	2	3	4
H				0.1	0.12839	0.199167	0.115398	0.088796
	DCS sensitivity			0.3	0.417727	0.492988	0.388455	0.356196
	GluN1 WT/GluN2B WT	GluN1 WT/GluN2B C456Y		0.5	0.632572	0.677974	0.603878	0.546342
1	0.536497	0.393563		1	0.811432	0.828845	0.77909	0.869624
2	0.56951	0.393103		2	0.889223	0.898149	0.848493	0.938172
3	0.571396	0.396921		10	0.960476	0.963529	0.961051	0.959371
4	0.574091	0.430031			GluN1 WT/GluN2B C456Y
5	0.579095	0.410336			1	2	3	4	5	6	7	8	9
6	0.570319	0.406988		0.1	0.077032	0.10135	0.063391	0.049824	0.07825	0.028904	0.077739	0.030135	0.044864
7	0.591429	0.376439		0.3	0.183889	0.252661	0.196611	0.16862	0.13074	0.122529	0.178358	0.141138	0.153826
8	0.578947	0.372966		0.5	0.303405	0.369761	0.313667	0.271852	0.258433	0.245825	0.278465	0.238827	0.246198
9	0.581466	0.381516		1	0.51126	0.548556	0.494356	0.482824	0.475687	0.44766	0.648712	0.643649	0.65767
				2	0.685772	0.706486	0.680582	0.656004	0.642979	0.627562	0.814268	0.818625	0.832428
				10	0.908601	0.906341	0.920363	0.911237	0.902552	0.905282	0.930528	0.936912	0.945415
				G
					Zinc dose-response curve
					GluN1 WT/GluN2B WT
					1	2	3	4	5	6	7	8	9	10	11
				0.3	0.664717	0.670372	0.683933	0.687168	0.679283	0.707693	0.673237	0.652919	0.680859	0.67714	0.667
				1.1	0.363952	0.362692	0.396372	0.422323	0.384907	0.391748	0.389456	0.378418	0.378855	0.39621	0.412886
				5.1			0.148575	0.194444	0.1699	0.14174	0.171456	0.14776	0.151627	0.164726	0.210029
				20.1			0.0239152	-0.0105105	0.0298774	0.0203001	0.0292509	0.0142732	0.00297619	-0.018259	0.00257317
					GluN1 WT/GluN2B C456Y
					1	2	3	4	5	6	7	8	9	10	11
				0.3	0.701693	0.684778	0.665057	0.75726	0.752483	0.772049	0.762712	0.753918	0.734212	0.736111	0.736274
				1.1	0.413364	0.372661	0.299527	0.512195	0.497338	0.528981	0.488546	0.458725	0.445623	0.46408	0.42617
				5.1				0.301984	0.289494	0.324573	0.22508	0.214734	0.217018	0.193487	0.185321
				20.1				0.0905771	0.102041	0.0961039	0.0172228	0.0721003	0.0545366	0.0513189	0.0557347

## Sheet: FigS4
A
Expression level (% of WT)
HT-P14
	GluN1			GluN2A			GluN2B
	WT	HT		WT	HT		WT	HT
1	1.25815	0.689972	1	0.814959	0.482453	1	0.881591	0.304105
2	1.11436	0.610739	2	1.08348	0.985897	2	1.04818	0.567002
3	0.533766	0.504446	3	0.861485	0.751909	3	0.893098	0.363125
4	1.09373	0.567765	4	1.24008	0.879484	4	1.17713	0.59723
HT-P21
	GluN1			GluN2A			GluN2B
	WT	HT		WT	HT		WT	HT
1	1.08843	0.750463	1	0.837227	1.29563	1	1.03197	0.631316
2	0.757473	0.411712	2	1.01088	0.901884	2	0.802831	0.511893
3	0.891242	0.59846	3	0.970867	0.758547	3	1.03773	0.536473
4	1.26285	0.66105	4	1.18103	0.835333	4	1.12747	0.508071
HT-P28
	GluN1			GluN2A			GluN2B
	WT	HT		WT	HT		WT	HT
1	0.710814	0.897545	1	1.45798	1.29322	1	0.979464	0.879502
2	1.195	0.910978	2	0.584651	0.716263	2	1.00062	0.584619
3	1.24576	0.725633	3	1.08018	0.913315	3	1.17335	0.491302
4	0.848432	0.974131	4	0.877187	0.949731	4	0.84657	0.623452
HT-P56
	GluN1			GluN2A			GluN2B
	WT	HT		WT	HT		WT	HT
1	0.434286	0.317238	1	0.842295	0.798823	1	0.950659	0.529803
2	0.533564	0.429736	2	0.952463	0.88936	2	1.07782	0.539576
3	0.352398	0.372755	3	0.629183	1.03528	3	0.711962	0.611723
4	2.67975	1.61534	4	1.57606	2.49141	4	1.25955	0.855974
B
	Grin2b Exon 3				Grin2b Exon 4				Grin2b Exon 11				Grin2b Exon 14
	WT	HT	KI Homo		WT	HT	KI Homo		WT	HT	KI Homo		WT	HT	KI Homo
1	1.03175	1.3262	1.60672	1	1.13622	0.866446	1.75431	1	0.956206	0.983196	2.02282	1	0.751158	0.801346	1.01606
2	1.24956	0.786327	1.13111	2	1.30664	1.01694	1.38557	2	0.774372	1.02498	1.39602	2	1.25371	0.780598	0.698561
3	0.752402	1.05145	0.910337	3	0.654068	1.08993	0.762384	3	0.728814	1.14594	1.02948	3	0.639851	1.4718	0.845023
4	0.966285	1.12048		4	0.903074	1.02035		4	1.54061			4	1.35528
	Grin1 Exon 3				Grin1 Exon 7				Grin1 Exon 12
	WT	HT	KI Homo		WT	HT	KI Homo		WT	HT	KI Homo
1	1.36315	1.53125	1.92742	1	1.13236	1.57815	1.37844	1	1.35876	0.85582	1.48263
2	0.602407	1.87774	0.641732	2	1.30847	2.15832	1.08256	2	1.28924	1.00536	1.22253
3	0.998341	2.06269	0.971821	3	0.55917	0.633044	0.518097	3	0.630441	2.25962	0.877981
4	1.0361	1.15373		4				4	0.721562	0.800035

## Sheet: FigS5
A							B
	mEPSC frequency			mEPSC amplitude				mIPSC frequency			mIPSC amplitude
	WT	HT		WT	HT			WT	HT		WT	HT
1	0.175	0.0833333	1	22.8811	38.1268		1	7.80833	4.71667	1	62.4738	34.2117
2	0.166667	0.191667	2	35.7606	33.1597		2	5.15	5.23333	2	40.9488	29.1647
3	0.0666667	0.216667	3	36.7969	23.9779		3	4.63333	4.76667	3	39.6677	37.9516
4	0.133333	0.116667	4	29.2088	32.66		4	6.35833	8.76667	4	41.9826	39.4218
5	0.141667	0.0583333	5	26.7581	30.7992		5	6.55833	7.45833	5	52.859	50.608
6	0.15	0.175	6	27.0938	32.3711		6	5.61667	6.95	6	28.1253	42.0338
7	0.425	0.266667	7	35.4045	23.3507		7	6.06667	6.86667	7	41.5603	40.133
8	0.116667	0.125	8	36.969	33.8664		8	7.08333	4.3	8	53.0161	40.791
9	0.125	0.133333	9	35.605	26.1251		9	7.025	6.19167	9	47.0048	46.6251
10	0.0916667	0.075	10	28.4662	27.1603		10	8.3	4.81667	10	47.2541	52.5654
11	0.133333	0.175	11	25.8829	30.722		11	6.00833	6.31667	11	44.8931	28.7979
12	0.141667	0.125	12	41.4577	34.1368		12	7.45	7.01667	12	50.8392	46.095
13	0.0416667	0.0916667	13	30.897	24.7505		13	6.94167	8.375	13	42.3301	44.5844
14	0.216667	0.2	14	47.1129	37.8911		14	8.20833	6.55	14	49.3092	40.6113
15	0.175	0.141667	15	35.094	29.8138		15	6.43333	8.40833	15	43.0877	44.7291
C							D
	sEPSC frequency			sEPSC amplitude				sIPSC frequency			sIPSC amplitude
	WT	HT		WT	HT			WT	HT		WT	HT
1	0.183333	1.16667	1	44.7569	36.3998		1	4.63333	4.45	1	59.4757	51.4952
2	1.71667	1.05	2	29.4234	37.2393		2	3.56667	4.23333	2	47.1937	39.3776
3	0.691667	0.0666667	3	102.234	17.3144		3	4.66667	6.19167	3	39.1551	81.8685
4	0.866667	0.5	4	34.6532	18.8327		4	2.375	5.49167	4	50.3238	49.6917
5	0.558333	0.241667	5	29.418	32.5423		5	4.11667	6.16667	5	48.397	66.0076
6	0.358333	1.06667	6	29.8795	37.9614		6	4.03333	3.5	6	43.8149	39.9482
7	0.708333	0.675	7	46.0295	49.4501		7	4.70833	6.95	7	39.8574	52.5951
8	0.441667	0.675	8	33.5863	59.5582		8	6.425	5.03333	8	62.4736	44.4857
9	1.15	0.683333	9	49.5486	48.5474		9	4.55833	5.90833	9	44.6466	55.5417
10	0.291667	0.558333	10	33.5724	29.78		10	5.55833	2.64167	10	55.3775	44.9158
11	0.233333	0.425	11	32.1506	20.0664		11	6.11667	7.425	11	48.6951	59.1368
12	0.616667	0.966667	12	30.5349	35.0502		12	4.125	3.7	12	43.1153	42.4547
13	0.416667	0.508333	13	28.2723	26.7828		13	3.94167	4.29167	13	43.7607	58.0782
14	0.85	1.19167	14	46.0481	33.4348		14		3.54167	14		40.0133
15	0.533333		15	24.4951			15		5.66667	15		54.6332
							16		5.5	16		46.1036
E							17		3.025	17		34.3807
	IPSC/EPSC ratio						18		5.575	18		56.0911
	WT	HT
1	0.524278	0.554256
2	0.620479	0.629871
3	0.580314	0.518531
4	1.21308	0.731498
5	0.682157	1.18605
6	0.42434	0.445168
7	0.616652	0.457878
8	0.190156	0.570084
F
	F-I curve
	WT
	1	2	3	4	5	6	7	8	9	10	11	12	13
0	0	0	0	0	0	0	0	0	0	0	0	0	0
30	0	0	0	0	0	0	0	0	0	0	0	0	0
60	1	0	2	0	0	2	0	2	3	2	0	0	0
90	4	2	6	4	3	4	2	6	6	5	3	0	0
120	5	5	9	6	7	6	4	8	8	7	4	2	3
150	7	7	10	8	9	8	6	10	10	8	6	4	6
180	8	8	11	9	11	9	8	11	11	10	7	6	7
210	9	9	13	10	13	10	9	12	12	10	8	7	8
240	10	10	14	11	14	11	10	13	13	11	9	8	10
270	10	11	14	12	15	11	11	14	14	11	9	9	11
300	11	11	15	13	16	12	11	15	14	12	10	10	12
330	11	12	16	13	16	13	12	15	15	12	10	11	12
360	12	13	16	14	17	13	13	16	15	12	11	11	13
	HT
	1	2	3	4	5	6	7	8	9	10	11	12	13
0	0	0	0	0	0	0	0	0	0	0	0	0	0
30	0	0	0	0	0	1	0	0	0	0	0	0	0
60	0	0	3	0	0	5	2	0	2	0	2	0	0
90	3	5	7	1	3	7	5	3	5	3	4	3	0
120	5	7	9	3	6	9	7	5	7	5	5	5	1
150	7	9	10	5	8	10	8	7	8	6	6	7	4
180	8	10	12	7	9	11	9	8	9	7	7	8	6
210	9	12	12	8	10	12	10	9	10	8	8	9	7
240	9	12	13	9	11	13	11	10	11	9	8	10	8
270	10	12	14	10	11	14	12	10	11	10	9	11	9
300	10	13	14	11	12	14	12	11	12	11	9	11	10
330	10	13	14	12	12	15	12	11	12	12	9	12	11
360	10	13	15	12	12	15	13	12	12	12	10	12	11

## Sheet: FigS6
A
	MWM Escape latency (sec)
	WT
	1	2	3	4	5	6	7	8	9	10	11	12
1	42	60	60	60	47.6667	60	43	60	60	45.3333	60	60
2	49	15.3333	35.3333	42	34.3333	36	11	35	49.6667	31.6667	57.6667	59.6667
3	45.6667	45	17.3333	27	60	40.6667	46.3333	43.3333	40.3333	60	60	50.3333
4	37.6667	13.6667	60	26.6667	45	34	40.3333	26.3333	36	49	56	22.3333
5	23.3333	47.6667	46.3333	45.6667	37	50.3333	16.3333	8.33333	25.3333	34.6667	50.6667	30
6	38	33	51.6667	34	28.3333	30.6667	12	11	24.6667	39.3333	39.6667	27.6667
7	23	9	60	13.6667	7	49	17.3333	28	25	7.33333	34.6667	55.3333
8	31	6.33333	25.3333	9.66667	11.6667	33.3333	9	5	36.3333	20.3333	23.3333	60
10	48	39.6667	39	25	24	30.6667	21	10.3333	35.6667	23.3333	38.6667	43
11	36	17.6667	55.6667	41	44.6667	47.3333	46.3333	12	53.3333	41.6667	60	26.3333
12	32.3333	9.66667	37	9	34.6667	47	11	18	28.3333	26.3333	38.6667	48
13	11.3333	24.6667	31.6667	6	44.6667	27.3333	26.6667	17	45.6667	6	45.3333	31
14	12.3333	28.6667	20.3333	22.6667	42.6667	12.3333	12	8.66667	40	56	32	40.3333
15	12.3333	16	21	5.33333	16.6667	32	7.66667	11	17	20.3333	23.3333	47
	HT
	1	2	3	4	5	6	7	8	9	10	11	12
1	43.6667	46.3333	60	60	60	46	60	60	60	60	60	60
2	27	47.6667	34.3333	60	54.3333	29.3333	49.6667	51	13.3333	60	32.3333	43.3333
3	19	39.6667	33	60	42.6667	22.6667	26.3333	42	37.6667	25.6667	21.3333	41
4	51.3333	44.6667	25.6667	60	52	22.6667	42	40	45.3333	60	22.3333	60
5	36.6667	26	7.66667	43.3333	39.3333	28.6667	18.3333	43	23	35.3333	22.3333	39.6667
6	22.6667	19.3333	8.66667	52	40	16.6667	32	17.3333	22.6667	41.3333	9.66667	41.3333
7	18.6667	35.3333	4.66667	59.3333	32.6667	50.3333	34.3333	15.3333	31.6667	30.6667	23.3333	38
8	12.3333	24.6667	12.3333	41.6667	40.3333	13	8.33333	6.33333	8.33333	42.6667	10	8.66667
10	22.3333	43.3333	30.3333	21.3333	60	28.6667	20	44.3333	35.6667	49	42	30.3333
11	44.3333	34	29.6667	27.6667	53.3333	26.3333	33.6667	11.6667	33	60	29.6667	50.6667
12	4.66667	44.3333	16	18.3333	43.6667	8.33333	13.3333	10	15	60	22.6667	17.3333
13	19	20.3333	9.33333	17.3333	45	5	51.3333	12.6667	9.66667	60	39.3333	23
14	44.6667	31.3333	31.6667	55.6667	51.6667	25	22	18	22.3333	60	28.6667	8.33333
15	8	10	15.6667	5.33333	36	13.3333	9.33333	10.3333	10	40	11.6667	9.66667
B									C
	Probe test (day 9), Quandrant Occupancy (% total), Learning phase									Platform crossing number
	WT				HT					WT	HT
	Taget	Opposite	Right	Left	Taget	Opposite	Right	Left	1	6	7
1	67.5662	17.2392	10.8439	4.72685	53.1075	13.3464	21.6878	12.2342	2	7	3
2	53.1075	33.088	10.2879	3.8927	31.4197	35.5903	17.2392	16.1269	3	3	6
3	23.0782	25.3025	24.7465	27.2488	58.1125	13.0684	20.8537	8.3415	4	9	1
4	53.9417	9.4537	24.7465	12.2342	29.1952	18.9073	15.8489	36.4245	5	6	3
5	42.2637	11.4001	36.4245	10.2879	38.927	12.2342	38.649	10.5659	6	3	3
6	25.8587	21.4098	17.7952	35.3123	31.6977	23.9123	22.244	22.522	7	3	4
7	59.2247	19.1855	13.3464	8.61955	43.6538	11.9561	20.8538	23.9123	8	6	7
8	56.1662	27.527	10.2879	6.39515	49.2148	29.7513	15.2927	6.1171	9	2	0
9	46.1563	21.6878	15.5708	16.961	11.122	4.72685	46.7123	37.8148	10	2	3
10	30.5855	27.805	28.9172	13.0684	67.01	12.7903	14.1806	6.39515	11	2	2
11	24.1903	23.3562	31.6977	21.1318	28.3612	19.4635	30.0293	22.522	12	0	2
12	20.0197	24.1903	23.6343	32.5318	20.5757	5.28295	10.8439	63.6735
D									E
	Probe test (day 16), Quandrant Occupancy (% total), Reversal phase									Platform crossing number
	WT				HT					WT	HT
	Taget	Opposite	Right	Left	Taget	Opposite	Right	Left	1	4	2
1	40.5953	28.083	15.2927	16.4049	39.205	21.966	12.7903	26.4147	2	2	5
2	45.0442	37.8148	6.95125	10.5659	35.8685	23.3562	22.522	18.6293	3	4	9
3	30.5855	21.4098	19.7415	28.6392	66.732	22.8002	8.8976	1.94635	4	8	3
4	58.9467	24.7465	6.39515	10.2879	39.205	17.7952	15.2927	28.083	5	5	2
5	38.3708	31.6977	8.61955	21.6878	43.6538	30.5855	9.73175	16.4049	6	2	4
6	48.1027	30.0293	16.683	5.561	58.9467	21.4098	6.39515	13.6244	7	2	3
7	44.21	26.6928	12.7903	16.683	29.7513	38.0928	6.39515	26.1367	8	5	2
8	51.1612	10.5659	27.805	10.8439	15.5708	44.766	8.3415	31.6977	9	3	6
9	49.771	31.4197	12.7903	6.39515	42.2637	23.9123	13.3464	20.8537	10	2	0
10	41.7075	32.8098	14.1806	11.6781	28.9172	23.6343	22.8002	25.0245	11	3	5
11	29.4733	10.0098	41.4295	19.4635	32.2538	28.6392	23.9123	15.5708	12	3	4
12	21.966	39.7612	22.8002	15.8489	30.3075	24.1903	28.9172	16.961
F
	Novel object preference (%)
	WT	HT
1	57.3038	50.9167
2	52.7616	84.8485
3	41.0104	49.4465
4	48.5267	48.8255
5	58.3873	55.2448
6	64.4879	71.4286
7	64.1071	71.3389
8	58.9753	52.4954
9	64.3939	38.9985
10	48.0534	57.4895
11	58.5739	81.1751
12	64.3606	55.2632

## Sheet: FigS7
A					B					C					D
	Sniffing time (s), Bright condition					Sniffing time (s), Bright condition					Time spent in chamber (s), Bright condition					Time spent in chamber (s), Bright condition
	WT		HT			WT		HT			WT		HT			WT		HT
	Ob	S1	Ob	S1		S1	S2	S1	S2		Ob	S1	Ob	S1		S1	S2	S1	S2
1	31.87	146.34	40.38	239.01	1	49.06	83.22	92.07	125.73	1	222.418	321.448	146.143	402.728	1	257.252	258.653	268.796	271.399
2	22.05	166.86	27.94	171.03	2	41.43	69.35	62.85	106.44	2	149.279	387.046	107.505	408.133	2	317.644	207.27	239.635	262.39
3	42.92	153.29	34.86	165.97	3	34.81	184.16	67.58	107.82	3	211.474	352.412	218.814	340.467	3	181.911	364.49	202.265	346.206
4	22.52	159.82	32.91	130.77	4	49.53	108.15	58.87	103.03	4	152.483	355.481	121.119	446.571	4	224.62	305.032	283.811	275.136
5	33.96	139.27	17.23	169.44	5	31.77	109.85	58.34	152.72	5	170.1	321.048	233.896	317.578	5	133.597	337.597	209.005	354.147
6	28.23	175.7	30.93	138.82	6	32.94	84.47	44.13	72.16	6	124.188	413.605	201.264	306.767	6	204.667	303.297	224.82	287.081
7	43.77	187.4	28.45	170.42	7	120.91	171.44	41.48	195.79	7	204	351.544	194.991	328.722	7	235.43	318.178	170.834	407.599
8	19.88	165.57	25.45	101.88	8	45.23	79.07	38.39	71.08	8	137.668	367.96	237.432	277.739	8	238.167	225.287	232.294	301.695
E					F					G					H
	Sniffing time (s), Dark condition					Sniffing time (s), Dark condition					Time spent in chamber (s), Dark condition					Time spent in chamber (s), Dark condition
	WT		HT			WT		HT			WT		HT			WT		HT
	Ob	S1	Ob	S1		S1	S2	S1	S2		Ob	S1	Ob	S1		S1	S2	S1	S2
1	22.02	129.94	18.8	126.13	1	88.93	59.71	17.13	108.26	1	190.453	310.037	133.197	377.703	1	195.058	293.154	166.163	342.135
2	40.72	108.28	18.29	144.77	2	17.95	71.63	49.15	155.95	2	164.561	323.183	109.641	385.844	2	206.869	272.533	139.203	345.338
3	19.37	136.29	18.59	186.79	3	51.74	66.72	62.69	113.72	3	94.4258	443.768	107.038	398.524	3	236.165	265.46	283.211	224.954
4	34.83	105.03	33.56	164.92	4	22.99	136.96	51	65.87	4	148.279	326.787	152.416	353.546	4	91.89	447.438	264.859	237.432
5	19.75	159.63	30.14	158.26	5	34.19	137.96	30.4	125.71	5	161.358	349.876	136.667	350.143	5	139.403	391.784	161.692	318.845
6	17.15	109.38	16.89	239.16	6	21.99	119.32	41.87	108.46	6	108.907	390.182	83.3483	472.062	6	138.335	371.697	261.723	277.005
7	29.43	101.31	37.76	168.56	7	34.05	71.69	35.61	101.82	7	233.162	271.132	173.17	348.808	7	178.642	313.307	130.061	386.712
8	25.69	134.92	10.38	122.35	8	19.71	67.99			8	152.616	343.269	96.361	413.939	8	175.839	266.728
I			J			K
	Total social interaction (s)			Nose-to-nose sniffing (s)			Following (s)
	WT	HT		WT	HT		WT	HT
1	76.5	86.58	1	5.72	8.09	1	10.96	18.38
2	75.25	71.06	2	7.03	7.05	2	18.25	10.92
3	67.74	79.4	3	6.5	7.87	3	8.42	10.82
4	79.19	77.12	4	5.2	10.09	4	22.91	9.23
5	49.65	82.37	5	6.78	7.75	5	8.53	9.89
6	66.96	88.89	6	9.89	14.54	6	9.28	12.49
7	86.68	94.44	7	9.01	6.52	7	29.42	18.39
8	97.63	138.28	8	10.34	8.48	8	26.14	42.02
9	108.9	93.59	9	9.46	10.25	9	15.77	30.43
10	59.53	53.44	10	9.08	8.51	10	10.7	16.86
11	64.04	80.84	11	7.77	10.94	11	18.15	17.01
12		81	12		7.64	12		23.88
13		131.08	13		15.49	13		25.5
L			M			N
	Number of calls			Duration of calls (ms)			Latency to first call (s)
	WT	HT		WT	HT		WT	HT
1	286	4	1	0.01067	0.00135	1	1.3091	95.906
2	633	22	2	0.03006	0.01124	2	28.1192	117.478
3	1410	1341	3	0.02299	0.05194	3	0.0284	0.0168
4	1088	123	4	0.02912	0.01163	4	1.5488	61.0314
5	317	201	5	0.01479	0.00747	5	28.365	4.9121
6	198	111	6	0.03574	0.00708	6	32.6745	52.5701
7	264	1336	7	0.01157	0.05158	7	7.7378	0.0058
8	1711	1411	8	0.03603	0.03475	8	0.9169	8.964
9	9	1319	9	0.00144	0.05143	9	81.3573	0.0811
10	1365	1502	10	0.03502	0.03594	10	0.0017	0.4083
11	1771	1575	11	0.03264	0.03223	11	10.6759	0.0012
12	793	2145	12	0.0174	0.02457	12	0.3532	3.36
13	1016	386	13	0.01237	0.008	13	0.0302	3.936
14	1359	1969	14	0.04319	0.03093	14	0.075	0.2191
15	1541	1617	15	0.0359	0.02386	15	0.065	0.0007
16	813	1591	16	0.03197	0.04583	16	0.1315	0.0015
17	1559	1114	17	0.03163	0.03133	17	0.0007	0.0391
18	1362		18	0.03551		18	0.0307
19	936		19	0.03667		19	0.0087
20	496		20	0.01622		20	0.4305
21	1250		21	0.02492		21	0.0012
O			P			Q
	Grooming time (s)			Digging time (s)			Grooming time (s)
	WT	HT		WT	HT		WT	HT
1	12.93	15.17	1	125.55	189.27	1	39.12	32.71
2	48.26	29.45	2	114.41	177.4	2	14.47	10.85
3	21.88	23.88	3	111.85	105.91	3	35.06	79.81
4	1.32	29.15	4	53.85	169.11	4	2.57	14.24
5	25.24	43.47	5	86.96	47.86	5	44.19	17.2
6	18.59	31.2	6	73.73	79.43	6	52.7	8.92
7	21.07	48.48	7	85.16	55.19	7	32.3	5.97
8	8.42	29.6	8	104.54	48.61	8	16.05	28.89
9	13.66	5.92	9	69.8	164.25	9	43.86	11.82
10	9.68	11.32	10	76.26	36.7	10	77.68	22.37
11	29.46	41.67	11	35.93	19.6	11	42.93	76.8
12	13.66	20.65	12	130.84	66.13	12	32.9	58.57
13	18.04	22.13	13	79.9	51.71	13	27.23	33.32
14	21.51	9.59	14	38.37	55.8	14	7.69	16.59
15	12.57	16.55	15	63.4	118.77	15	5.88	26.25
16	13.66	13.9	16	62.35	51.74	16	5.56	15.22
17	3.57	57.11	17	46.08	21.21
18	24.85		18	25.94
19	8.67		19	69.42
20	21.09		20	137.74
21	16.52		21	67.12

[truncated: 5 more sheets: FigS8, FigS9, FigS10, FigS11, FigS12]
